1 **The fungal root endophyte *Serendipita vermifera* displays inter-kingdom**  
2 **synergistic beneficial effects with the microbiota in *Arabidopsis thaliana* and barley**

3 Lisa K. Mahdi\*<sup>1</sup>, Shingo Miyauchi\*<sup>2</sup>, Charles Uhlmann<sup>2</sup>, Ruben Garrido-Oter<sup>2,3</sup>, Gregor  
4 Langen<sup>1</sup>, Stephan Wawra<sup>1,3</sup>, Yulong Niu<sup>2</sup>, Senga Robertson-Albertyn<sup>4</sup>, Davide  
5 Bulgarelli<sup>4</sup>, Jane E. Parker<sup>2,3</sup> and Alga Zuccaro<sup>1,3</sup>

6 \* These authors contributed equally

7 <sup>1</sup> University of Cologne, Institute for Plant Sciences, Cologne, Germany

8 <sup>2</sup> Max Planck Institute for Plant Breeding Research, Department of Plant Microbe  
9 Interactions, Cologne, Germany

10 <sup>3</sup> Cluster of Excellence on Plant Sciences (CEPLAS)

11 <sup>4</sup> University of Dundee, Plant Sciences, School of Life Sciences, Dundee, United  
12 Kingdom

13 **Abstract**

14 Plant root-associated bacteria can confer protection against pathogen infection. By  
15 contrast, the beneficial effects of root endophytic fungi and their synergistic interactions  
16 with bacteria remain poorly defined. We demonstrate that the combined action of a fungal  
17 root endophyte from a widespread taxon with core bacterial microbiota members provides  
18 synergistic protection against an aggressive soil-borne pathogen in *Arabidopsis thaliana*  
19 and barley. We additionally show early inter-kingdom growth promotion benefits which are  
20 host and microbiota composition dependent.

21 **Highlights**

- 22 • The root endophytic fungus *Serendipita vermifera* can functionally replace core  
23 bacterial microbiota members in mitigating pathogen infection and disease symptoms.
- 24 • *S. vermifera* additionally stabilizes and potentiates the protective activities of root-  
25 associated bacteria and mitigates the negative effects of a non-native bacterial  
26 community in *A. thaliana*.
- 27 • Inter-kingdom synergistic beneficial effects do not require extensive host  
28 transcriptional reprogramming nor high levels of *S. vermifera* colonisation.

- 1 • Inter-kingdom protective benefits are largely independent of the host while synergism  
2 leading to early inter-kingdom growth promotion is driven by host species and  
3 microbiota composition.

#### 4 **Introduction**

5 Plant pathogenic fungi limit crop productivity globally. These threats are expected to  
6 increase with global warming (Delgado-Baquerizo et al., 2020). Decades of advances in  
7 agrochemicals and plant breeding have expanded farmers' toolkits with fungicides and  
8 resistant varieties to limit detrimental effects of these organisms on crop yield. Yet, current  
9 tools are becoming environmentally unsustainable or ineffective against rapidly evolving  
10 pathogens (Delgado-Baquerizo et al., 2020). A key example of this scenario is  
11 represented by the soil-borne plant pathogen *Bipolaris sorokiniana* (syn. *Cochliobolus*  
12 *sativus*, hereafter *Bs*), the causal agent of spot blotch and common root rot diseases that  
13 threaten cereal production in warm regions (Delgado-Baquerizo et al., 2020; Duveiller and  
14 Gilchrist, 1994; Manamgoda et al., 2014). Root rot normally originates from inoculum  
15 carried on the seed or from soil-borne conidia, but the fungus can infect plants at any  
16 developmental stage. However, as the importance of root-inhabiting pathogenic fungi has  
17 often been underestimated, very little is known about the molecular mechanism behind  
18 the detrimental interaction of *Bs* with roots (Sarkar et al., 2019).

19 Microbial communities living at the root-soil interface, collectively referred to as the plant  
20 root microbiota, have gained center-stage in pathogen protection (Bulgarelli et al., 2015).  
21 Past studies across a variety of plant species employed environmental sampling or  
22 controlled conditions in the field and laboratory to characterise the root microbiota (Duran  
23 et al., 2018; Edwards et al., 2015; Fitzpatrick et al., 2018; Lundberg et al., 2012; Thiergart  
24 et al., 2020a), with an overall greater focus on bacteria than on filamentous fungi (Whipps,  
25 2001). Microbial diversity and abundance gradually decrease between the soil and vicinity  
26 of the root (rhizosphere), and further between the rhizosphere and root internal  
27 compartments (endosphere). Moreover, a number of bacterial taxa (e.g., Proteobacteria,  
28 Actinobacteria, Bacteroidetes and Firmicutes) consistently occur in the root endosphere  
29 of different examined plant species (Fitzpatrick et al., 2018). This latter feature underpins  
30 the "bacterial core microbiota" concept, in which strains from specific taxa are commonly

1 selected as endophytes across plant species, soil types and environmental conditions  
2 (Lemanceau et al., 2017). By contrast, studies of geographically distinct populations of  
3 *Arabis alpina* and *Arabidopsis thaliana* (hereafter *Arabidopsis*) showed that few fungal  
4 taxa are prevalent in the root endosphere, and that endophytic fungal communities are  
5 strongly influenced by location and climate (Almario et al., 2017; Thiergart et al., 2020a).

6 The functions and benefits of root microbiota members in the context of abiotic or biotic  
7 stresses have been extensively investigated under laboratory conditions using single  
8 microbial strains and, more recently, synthetic bacterial communities (SynComs) (Vorholt  
9 et al., 2017). Several bacterial and fungal isolates have the capacity to directly increase  
10 plant biomass via growth hormone production and/or by providing plants with limiting  
11 macro- or micro-nutrients (Almario et al., 2017; Franken, 2012; Harbort et al., 2020;  
12 Hermosa et al., 2012; Hiruma et al., 2016; Spaepen et al., 2007). Although diseases  
13 caused by pathogens have been shown to be directly or indirectly reduced by the addition  
14 of single or multiple beneficial microbes (Pieterse et al., 2014; Vlot et al., 2020), how fungal  
15 root microbiota members with beneficial functions influence and are influenced by  
16 bacterial colonisation remains less understood.

17 Sebaciniales fungi (Basidiomycetes) are a remarkable group of plant mutualists with  
18 worldwide occurrence in soils and as endophytes. While single Sebaciniales strains can  
19 interact with roots in the absence of differentiated structures, they can also form  
20 specialized interactions with distinctive morphological characteristics on relevant hosts,  
21 as in orchid- or ectomycorrhiza symbioses (Weiss et al., 2016a). Root colonisation by  
22 these fungi improved host growth and development, increased grain yield and enhanced  
23 root phosphate uptake in several plant species (Fesel and Zuccaro, 2016; Oberwinkler et  
24 al., 2013; Zuccaro, 2020; Zuccaro et al., 2014). The positive effects of Sebaciniales on the  
25 host plant extend well beyond growth and development and cannot be explained by  
26 enhanced host nutrition alone (Oberwinkler et al., 2013; Tedersoo et al., 2014; Weiss et  
27 al., 2016b). Recently, it was shown that fungal derived effector molecules (called  
28 effectors) contribute to the establishment of the Sebaciniales-host interactions (Nizam et  
29 al., 2019; Nostadt et al., 2020; Rafiqi et al., 2013; Wawra et al., 2016). These effectors  
30 suppress plant defense responses and modulate plant metabolism to promote  
31 compatibility in the roots, but their contribution to beneficial outcomes is unclear. Similarly,

1 the nature of host transcriptional programs and signalling networks which lead to a  
2 mutually beneficial fungus-plant partnership are not well understood.

3 In the past few years, microbe-microbe interactions have emerged as an additional  
4 important element shaping plant host-microbe interactions. Using a soil-based split-root  
5 system, we demonstrated that both local and systemic colonisation by the Sebaciniales  
6 endophyte *Serendipita vermifera* (syn. *Sebacina vermifera*, hereafter *Sv*) afford protection  
7 against *Bs* infection and disease symptoms in *Hordeum vulgare* (barley) (Sarkar et al.,  
8 2019). Here, we explore how *Sv* and *Bs* colonisation capacities in two plant species,  
9 barley and Arabidopsis, are modulated by the presence of individual members of the core  
10 bacterial microbiota or SynComs isolated from the barley rhizosphere (Robertson-  
11 Albertyn et al., 2021) or Arabidopsis roots (Bai et al., 2015). The finding that *Bs* also infects  
12 and causes disease symptoms in Arabidopsis roots motivated us to develop a set of  
13 physiological measurements to characterize disease severity and plant growth in  
14 Arabidopsis under different microbe treatment regimes. These measurements include ion  
15 leakage (quantified *via* electric conductivity) and photosynthetic activity (measured using  
16 pulse amplitude modulation fluorometry) as readouts for host cell death progression and  
17 biotic stress during the host-microbe interaction. Analyses of inter-kingdom activities in  
18 barley and Arabidopsis revealed that *Sv* can functionally replace root-associated bacteria  
19 by mitigating pathogen infection and disease symptoms in both hosts. Additionally, we  
20 show that cooperation between bacteria and beneficial fungi leads to inter-kingdom  
21 synergistic beneficial effects. Finally, RNA-seq experiments with selected bacterial strains  
22 alone or combined with *Sv* and/or *Bs* provide insights to how microbes synergistically  
23 protect plants. We conclude that plants have evolved to preferentially accommodate  
24 communities that support their health and that root-associated prokaryotic and eukaryotic  
25 microbes can act synergistically with the plant host in limiting fungal disease.

## 26 **Material and Methods**

### 27 Plant, fungal and bacterial materials

28 Barley (*Hordeum vulgare* L. cv Golden Promise) and *Arabidopsis thaliana* Col-0 were  
29 used as plant host organisms. *Serendipita vermifera* (MAFF305830) and *Bipolaris*  
30 *sorokiniana* (ND90Pr) were the fungal models used in this study. The *AtSynCom* consists

1 of four bacterial strains from the *AtSphere* collection (Bai et al., 2015). The *HvSynCom*  
2 consists of 26 bacterial strains of an existing collection (Robertson-Albertyn et al., 2021)  
3 as described in Figure S1.

#### 4 Growth conditions and microbe inoculations

5 Barley seeds were surface sterilized in 6 % sodium hypochloride for one hour under  
6 continuous shaking and subsequently washed each 30 min for 4 h with sterile water. The  
7 seeds germinated on wet filter paper in darkness and room temperature for 4 days,  
8 transferred to 1/10 PNM (Plant Nutrition Medium, pH 5.7) (Wawra et al., 2016) in sterile  
9 glass jars for growth at a day/night cycle of 16/8 h at 22/18°C, 60 % humidity under 108  
10  $\mu\text{mol m}^{-2} \text{s}^{-1}$  light intensity post inoculation.

11 *Arabidopsis* seeds (Col-0, hereafter *At*) were surface sterilized in two times 70 % and 100  
12 % EtOH respectively for 5 min each and sown on ½ MS (Murashige-Skoog-Medium  
13 including vitamins, pH 5.6) with 1% sucrose after ethanol removal. Following two days of  
14 stratification at 4 °C and darkness, the seeds germinated at a day/night cycle of 8/16 h at  
15 22/18°C, 60 % humidity and a light intensity of 125  $\mu\text{mol m}^{-2} \text{s}^{-1}$  for seven days. Growth  
16 matched seedlings were transferred to 1/10 PNM medium in 12x12 cm square petri dishes  
17 1 day prior to microbe inoculation.

18 Single bacterial strains were grown separately in liquid TSB medium (Sigma Aldrich) (15g/  
19 L) at 28°C in darkness shaking at 120 rpm for 1 to 3 days depending on growth rates.  
20 Final OD<sub>600</sub> was adjusted to 0.01 prior to inoculation of single strains or mix in equal  
21 amounts for SynComs constitutions to a final OD<sub>600</sub> of 0.01.

22 *Sv* was propagated on MYP medium (Lahrmann et al., 2015) and *Bs* on modified CM  
23 (Sarkar et al., 2019) medium both containing 1.5% agar at 28 °C in darkness for 21 days  
24 and 14 days pre inoculation respectively. *Sv* mycelial and *Bs* conidia suspensions were  
25 prepared as described in (Sarkar et al., 2019).

26 *Arabidopsis* roots were inoculated either with *Sv* mycelium (1g/50ml), *Bs* conidia ( $5 \times 10^3$   
27 spores/ml), bacteria (OD<sub>600</sub> = 0.01) or a mixture of organisms contained in 0.5ml sterile  
28 water equally spread across individual plates. Barley roots were inoculated with 3ml of *Sv*  
29 mycelium (2g/50ml), *Bs* conidia ( $5 \times 10^3$  spores/ml), bacteria (OD<sub>600</sub> = 0.01) or a respective

1 mixture of organisms per jar. Sterile water was used as a control treatment. Arabidopsis  
2 and barley roots were harvested at 6 dpi. Roots of both plants were cut, washed  
3 thoroughly to remove extraradical fungal hyphae and bacteria and snap-frozen in liquid  
4 nitrogen. Per repeat of each experiment and treatments, roots from 60 Arabidopsis plants  
5 or 4 barley plants were pooled.

#### 6 Pulse-Amplitude-Modulation (PAM) fluorometry and ion leakage measurement

7 For PAM fluorometry and ion leakage assays, Arabidopsis seedlings were harvested at 7  
8 dpi. The plant roots were washed carefully and thoroughly to remove extraradical fungal  
9 hyphae and bacteria and subsequently transferred to a 24 well plate containing 2 ml sterile  
10 water. Five seedlings of the same treatment were pooled in one well. PAM fluorometry  
11 and ion leakage were measured every 24 hours for 4-7 days as previously described  
12 (Dunken et al., submitted).

#### 13 RNA isolation for RNA-seq and RT-PCR

14 RNA extraction for quantification of fungal colonisation and RNA-seq, cDNA generation  
15 and RT-PCR were performed as described previously (Sarkar et al., 2019). Primers used  
16 are listed in Table S1.

#### 17 Genomic and transcriptomic data analysis

18 Stranded mRNA-seq Libraries were prepared according to the manufacturer's instructions  
19 (Vazyme Biotech Co., Nanjing, China). Qualified libraries were sequenced on a HiSeq  
20 3000 system instrument at Genomics & Transcriptomics Laboratory, Heinrich-Heine  
21 University, Germany (<https://www.gtl.hhu.de/en.html>) to generate 50 million reads with a  
22 150-bp read length from two to three biological replicates). Reads with Illumina adaptors  
23 and the sequence quality lower than 15 were removed using fastp (Chen et al., 2018).  
24 Reads were mapped to the annotated genomes of the three organisms (barley: IBSC  
25 Morex v2, *Bipolaris sorokiniana*: Cocsa1, *Serendipita vermifera*: *Sebacina vermifera*  
26 MAFF 305830 v1.0, Table S2). Count per gene files were generated using an in-house  
27 multi-organism mapping pipeline (Niu et al. in preparation). Read count per transcript was  
28 converted into read count per gene using R package tximport (Soneson et al., 2015).  
29 Potential batch effects were excluded with Combat-seq function in SVA package (Zhang

1 et al., 2020). We selected 25,172 of 39,734, 10,178 of 12,250, and 13,376 of 15,312 genes  
2 having more than averaged five reads per condition for *H. vulgare*, *B. sorokiniana*, and *S.*  
3 *vermifera* respectively for the analysis (Table S3-5). The log<sub>2</sub> fold difference of the gene  
4 expression between conditions was calculated with R package DESeq2 (Love et al.,  
5 2014). Genes with statistical significance were selected (FDR adjusted p value < 0.05).  
6 The consistency of normalized transcription from two to three biological replicates was  
7 confirmed by visualizing the distribution of read counts. Normalized read counts of the  
8 genes were also produced with DESeq2, which were subsequently log<sub>2</sub> transformed.  
9 Functional annotation sets were combined using Carbohydrate Active Enzyme database  
10 (CAZy,(Lombard et al., 2014), the Gene Ontology (GO; The Gene Ontology Consortium,  
11 2015(Gene Ontology, 2015)), Kyoto Encyclopedia of Genes and Genomes (KEGG;  
12 (Ogata et al., 1999)), and EuKaryotic Orthologous Groups (KOG;(Tatusov et al., 2003),  
13 PFAM (Finn et al., 2016), Panther (Thomas et al., 2003), MEROPS (Rawlings et al., 2018).  
14 KOG, GO, KEGG, PFAM, Panther, MEROPS, best *O. sativa* hit homologues, best  
15 *Athaliana* TAIR10 hit homologues were obtained from Phytozome, JGI  
16 ([https://phytozome.jgi.doe.gov/pz/portal.html#!bulk?org=Org\\_Hvulgare\\_er](https://phytozome.jgi.doe.gov/pz/portal.html#!bulk?org=Org_Hvulgare_er)). CAZymes,  
17 MEROPS, and GO terms were obtained based on KEGG, GO, PFAM, IDs using R  
18 packages KEGG.db, GO.db, and PFAM.db (Carlson, 2016; Carlson, 2019; Carlson et al.,  
19 2018). Fungal genomes and functional annotations were obtained from MycoCosm, Joint  
20 Genome Institute (<https://myco cosm.jgi.doe.gov/myco cosm/home>). The latest CAZy  
21 annotations were provided from CAZy team ([www.cazy.org](http://www.cazy.org)). Theoretically secreted  
22 proteins were determined with Secretome pipeline described previously (Pellegrin et al.,  
23 2015). We identified the genes coding for CAZymes, lipases, proteases, small secreted  
24 proteins (less than 300 amino acid) as a subcategory. Fungal effectors were previously  
25 identified, which were combined with the predicted secretome information in this study  
26 (Sarkar et al., 2019). We sorted significantly differentially regulated genes specific to the  
27 conditions (> 1 log<sub>2</sub> FC; FDR adjusted p < 0.05) and visualized with R package UpSetR  
28 (Gehlenborg and Conway, 2019). Such genes were grouped using K-means clustering  
29 with R package, pheatmap (Kolde, 2019). Networks of k-means clustered genes  
30 visualised with R package, ggraph (Pedersen, 2020). Genes expressed differently among  
31 the conditions were identified based on principal coordinates calculated with R package  
32 Vegan (Oksanen et al., 2020). The first three principal coordinates were used to select

1 high loading genes coding for glycosyl hydrolases and effectors of *B. sorokiniana*.  
2 Comparative analyses with a previous transcriptomic dataset (Sarkar et al., 2019) showed  
3 that 37 of the 50 top induced barley genes in response to *Bs* in soil are again detected to  
4 be significantly induced in the Barley\_*Bs* vs Barley comparison in PNM (this study),  
5 indicating a large overlap of the highly responsive host genes to the pathogen in soil and  
6 PNM. Data are deposited to the NCBI under the BioProject accession number:  
7 PRJNA715112.

### 8 Gene co-expression analysis

9 A self-organizing map (SOM) was trained with the normalized read count of the selected  
10 replicates using Rsomoclu and kohonen (Peter Wittek, 2017; Ron Wehrens, 2007). The  
11 total of 1015 nodes (35 x 29 matrix was used with a rectangular shape (four neighbouring  
12 nodes). The resolution of 25 genes per node was applied for clustering, which was  
13 empirically optimised (Miyachi et al., 2016; Miyachi et al., 2017). The epoch of 1000  
14 times more than the map size was applied (i.e., 1,015,000 iterations of learning, being  
15 1015 map size times 1000). The genes showing similar regulation trends were grouped  
16 based on the mean transcription of the nodes. We examined genome-wide condition-  
17 specific transcriptomic patterns in graphical outputs (i.e. Tatami maps). Mean transcription  
18 values were calculated from the grouped genes per condition in each node (i.e. node-wise  
19 transcription). Then, using the node-wise transcription values, highly-regulated genes  
20 specific to each of the conditions were determined by fulfilling either of two criteria: 1) >  
21 12.6 log<sub>2</sub> reads (above 95th percentile of the entire transcribed genes); or 2) over ± 2 log<sub>2</sub>  
22 transcriptional differences between testing conditions and a control. The process above  
23 was performed in a semi-automated manner using co-gene expression pipeline  
24 (SHIN+GO; (Miyachi et al., 2020; Miyachi et al., 2016; Miyachi et al., 2017; Miyachi  
25 et al., 2018). R was used for operating the pipeline (R Core Team, 2013).

## 26 **Results**

### 27 **Sebacinales associate with healthy Arabidopsis plants in diverse European** 28 **locations**

29 By monitoring root-associated microbial communities in natural *A. thaliana* populations,  
30 Thiergart et al. (Thiergart et al., 2020b) showed that microbial community differentiation



1 in the roots is explained primarily by location for filamentous eukaryotes and by soil origin  
2 for bacteria, whereas host genotype effects are marginal. We re-analysed this dataset,  
3 including lower abundance operational taxonomic units (OTUs), and found that fungal  
4 OTUs of the order Sebaciales were significantly enriched in the rhizoplane compartment  
5 of healthy *Arabidopsis* plants in diverse European locations (Figure 1). These  
6 environmental sampling data complement cytological studies which show that  
7 Sebaciales isolates colonize *Arabidopsis* by forming a loose hyphal mesh around roots  
8 with intracellular colonisation limited to the root epidermis and cortex layer (Lahrmann et  
9 al., 2015). The frequent occurrence and enrichment patterns of Sebaciales OTUs in the  
10 roots of native *Arabidopsis* suggest a functional endophytic association with this host in  
11 nature. This finding motivated us to investigate the functional relevance and resilience of  
12 these fungi in a community context in the roots of *Arabidopsis* and to compare these with  
13 the beneficial effects observed in barley using bacterial synthetic communities.

#### 14 **Protection mediated by *S. vermifera* and bacteria is synergistic and largely** 15 **independent of the host**

16 We reported that *Sv* acts as an extended plant protection barrier in the rhizosphere which  
17 reduces barley root infection and disease symptoms caused by the hemibiotrophic  
18 pathogen *Bs* on defined plant sugar-free minimal medium (PNM) and in natural soil  
19 (Sarkar et al., 2019). Here we confirmed the protective activity of *Sv* during *Bs* infection  
20 of barley root tissue (Figures 2A-D) and additionally we observed enhanced *Sv*  
21 colonization through the presence of *Bs* at 6 days post inoculation (dpi) on PNM (Figure  
22 2B).

23 To establish whether *Sv* antagonizes root infection by *Bs* in other plant hosts, we  
24 assessed fungal colonisation and disease symptoms in root tissues of *Arabidopsis* with  
25 *Sv*, *Bs* or both fungi on PNM (Figure 3A). *Bs* infected *Arabidopsis* seedlings displayed  
26 prominent disease symptoms at 6 dpi such as reduced main root length, rosette diameter  
27 and lateral root number compared to mock inoculated controls (Figures 3B, S2B and  
28 S2C). *Bs* inoculated roots exhibited characteristic tissue browning (Figure S2G),  
29 increased ion leakage and a reduced photosynthetic active leaf area over time, indicative  
30 of host cell death progression (Figures 3E-I and S2F). As shown for barley and in  
31 accordance with their growth rates in axenic cultures (Sarkar et al., 2019), *Bs* generated

1 more endophytic biomass than *Sv* upon separate inoculations of *Arabidopsis* roots,  
2 determined by a quantitative reverse transcription PCR (RT-qPCR) test displaying the  
3 ratio between constitutively expressed single copy fungal (*TEF*) and plant (*UBI*) genes  
4 (Figures 3C and 3D). Notably, *Bs* endophytic biomass and disease symptoms were  
5 substantially diminished in roots that were co-colonized by *Sv* (Figures 3B, 3C and S2).  
6 In contrast, *Sv* endophytic colonisation was enhanced by the presence of the pathogen  
7 also in this tripartite interaction (Figure 3D). The enhanced *Sv* colonization in both hosts  
8 could be explained by the plant actively recruiting *Sv* to suppress the soil-born pathogen  
9 or *Sv* feeding on *Bs* and/or necrotic plant tissues.

10 Next, we determined whether bacterial strains isolated from the rhizosphere of barley  
11 (*HvSynCom*) or the endosphere of *Arabidopsis* roots (*AtSynCom*) can also protect barley  
12 and *Arabidopsis* from *Bs* infection. Both SynComs were able to reduce *Bs* colonisation  
13 and largely rescue plant growth phenotypes caused by the pathogen in both hosts  
14 (Figures 2A, 2C, 3B, 3C and S2). Interestingly, the *HvSynCom* alone, but not the  
15 *AtSynCom*, caused increased ion leakage and reduced photosynthetic active leaf area in  
16 *Arabidopsis* (Figures 3E-H and S2A). This points towards an induction of host cell death  
17 in *Arabidopsis* by the non-native bacterial SynCom.

18 To clarify whether the observed host protection against *Bs* infection is a general property  
19 of root-associated bacterial strains or requires a community context, we inoculated  
20 functionally and taxonomically-paired bacterial strains from the *Hv*- and *At*-SynComs  
21 (Figure S1) individually or in combination with *Bs* on barley. We observed a strong  
22 reduction of the pathogen infection with the Proteobacteria strains bi08 (*Pseudomonas*  
23 sp.) and Root172 (*Mesorhizobium* sp.) but not with the Firmicutes strain bi80 (*Bacillus* sp.)  
24 and only marginally with Root11 (*Bacillus* sp.) irrespective of the host species origin  
25 (Figure 2A). This indicates that not all bacterial strains in the SynComs have the ability to  
26 protect the roots from *Bs* infection but the overall protection effect is maintained in a  
27 community context.

28 Next, we interrogated whether the observed beneficial effects on the plant hosts mediated  
29 by *Sv* or the bacterial strains are retained or altered during inter-kingdom interactions. For  
30 this, we co-inoculated barley and *Arabidopsis* roots with *Sv* and *Bs* in combination with a

1 single bacterial strain or the SynComs. We found that *Sv* colonisation was only marginally  
2 affected by the presence of the bacteria (Figures 2B and 3D). The combined presence of  
3 *Sv* and bacterial strains led to a stabilized (reduced biological variation) or potentiated  
4 host protection against *Bs* infection (Figure 2A, 3C and S2). Potentiated protection to *Bs*  
5 infection was most evident during co-inoculation of *Sv* with Root11 in barley (Figures 2A  
6 and 2C). These data show a robust inter-kingdom protective effect of *Sv* with bacteria  
7 against an invasive fungal root pathogen.

8 Finally, to measure whether the host plant contributes to the effects displayed by *Sv* and  
9 the examined bacterial strains in limiting pathogen biomass, we additionally performed  
10 direct microbe-microbe confrontation assays on PNM. In these assays we largely  
11 recapitulated the antagonism observed against *Bs in planta* (Figure 2E and 2F). We  
12 therefore concluded that microbe-microbe interactions rather than the host plant are most  
13 important for conferring the root protective properties of *Sv* or the tested bacteria. This  
14 notion is also supported by *in planta* cytological analyses in which we observed a direct  
15 interaction between *Bs* and Root172 at the rhizoplane of Arabidopsis and extensive lysis  
16 of the fungal extracellular polysaccharide matrix surrounding *Bs* hyphae (Figure 4).

### 17 ***S. vermifera* confers plant growth promotion in cooperation with selected root-** 18 **associated bacteria**

19 *Sv* promotes plant growth in different host species at late stages of colonisation (Barazani  
20 et al., 2005; Ghimire et al., 2009; Waller et al., 2008). At an early colonisation time point  
21 of 6 dpi in barley, neither *Sv* alone nor any of the single bacterial strains or SynComs led  
22 to a significant change in root fresh weight (Figure 2C). By contrast, a combination of *Sv*  
23 and bacterial strains Root11, bi08 or bi80, significantly increased barley root fresh weight  
24 at 6 dpi (Figure 2C). This early inter-kingdom mediated root growth promotion effect was  
25 strain-specific, not restricted to bacterial strains isolated from the barley rhizosphere, and  
26 maintained in a community context. Co-inoculation with heat-inactivated bacterial  
27 SynComs failed to increase barley root fresh weight (Figure S3), underlying the  
28 importance of living bacteria in promoting root growth.

29 In Arabidopsis, we observed root growth inhibition at 6 dpi upon inoculation with *Bs* or the  
30 SynComs irrespective of the number of bacterial strains and their host origin (Figure 3B).

1 Co-inoculation with *Sv* largely alleviated the *Bs*-mediated root growth inhibition but did not  
2 increase root or shoot size compared to controls (Figures 3B, S2B and S2C). Only the  
3 combination of Root172 with *Sv* led to a significant increase in *Arabidopsis* rosette  
4 diameter at 6 dpi (Figures S2D and S2E). This phenotype was, however, not retained in  
5 a bacterial community context, suggesting that it is less robust and/or plant growth  
6 promoting microbes suffer from competition by other community members. Put together,  
7 our data suggest that the establishment of beneficial inter-kingdom interactions in the  
8 plant microbiota is an evolutionarily conserved trait that can be fine-tuned by bacterial  
9 composition and host species.

## 10 **Inter-kingdom synergistic beneficial activities are not associated with extensive** 11 **host transcriptional responses**

12 To investigate mechanisms underlying the synergistic beneficial effects displayed by a  
13 combined fungal endophyte and bacterial inoculation, we analysed the barley root  
14 transcriptome during fungal and bacterial colonisation by RNA-seq. The multipartite  
15 systems used for transcriptomics included the two fungi (*Sv* and *Bs*) and the bacterial  
16 strains Root172 or Root11, selected based on their distinctive and robust *in planta*  
17 activities with *Bs* and *Sv* at 6 dpi. Namely, Root172 conferred strong host protection  
18 against *Bs* whereas Root11 had a strong root growth promotion phenotype (Figures 2A  
19 and 2B). To determine species representation in the Illumina RNA-seq reads, we mapped  
20 reads to annotated genes of the barley and fungal reference genomes. Bacterial reads  
21 were not present in the dataset due to the method used for the library preparation. On  
22 average, 7.9% of reads matched *Sv* genes in all endophyte-containing samples (Figure  
23 5A; Table S2). By contrast, the relative abundance of reads mapping to *Bs* genes  
24 decreased from 13.1% (*Bs* alone) to 8.6%, 12% or 5% when *Sv*, Root11 or Root172 were  
25 co-inoculated with the fungal pathogen, respectively. Co-inoculation of Root11 or Root172  
26 with *Sv* and *Bs* reduced the relative abundance of pathogen reads, to 2.6% and 2.7%,  
27 respectively. The reduction in *Bs* reads with *Sv* and/or bacterial strains likely reflects  
28 reduced *Bs* biomass, confirming the quantitative RT-PCR analysis (Figure 2A). To dissect  
29 barley transcriptomic trends and identify differentially expressed genes (DEG), we  
30 examined genes that were induced or repressed under specific conditions after transcript  
31 mapping and quality assessment (Figure S5, see Methods). Consistent with our previous

1 data (Sarkar et al., 2019), we detected only a weak host transcriptomic response to Sv  
2 (184 DEG with  $\log_2FC > 1$ , Figure 5C; Table S7). Neither presence of the bacterial strains  
3 nor combined presence of bacteria and Sv led to an extensive host transcriptional  
4 response (Figures 5C and S6; Table S7). Thus, the observed early root growth promoting  
5 effects mediated by Sv with Root11 in barley were not accompanied by a strong host  
6 transcriptional response (with 13 DEG specific to this condition, Figures 5C and S6; Table  
7 S7).

8 Conversely, infection with *Bs* resulted in 2,743 barley DEG. Co-inoculation of *Bs* and  
9 Root172 reduced barley DEG to 1,517, whereas Root11 with *Bs* produced a larger  
10 number of DEG (3,528) compared to *Bs* alone (Figures 5C and S6). Grouping DEG  
11 according to expression patterns identified 15 clusters of highly up or down regulated  
12 barley genes specific to one or more condition/s (Figures 5D and 5E; Table S8) and  
13 showed that the barley response to co-inoculation with *Bs* and Root11 was most different  
14 from all other conditions (Figure 5E). To identify functional categories in co-regulated  
15 genes, we employed a self-organizing map (SOM) to group genes into nodes displaying  
16 similar regulation (Figure S7; Table S6) and we performed GO enrichment analyses  
17 (Figure S8). These analyses showed that *Bs* alone strongly induced a barley immune  
18 response and terpenoid phytoalexin production. Root11 had no effect on immunity or  
19 terpenoid phytoalexin production, whereas Root172 slightly induced an immune  
20 response. Notably, co-inoculation of Root11 with *Bs* provoked a higher activation of  
21 immunity genes and repression of host cell wall biosynthesis and DNA modification  
22 compared to the pathogen alone (Figure S8; Table S8).

23 In accordance with the reduction of *Bs* biomass and disease symptoms, the presence of  
24 Sv reduced the number of barley DEGs in response to *Bs* (Sv\_ *Bs*: 2,403). This reduction  
25 was most pronounced in combination with the bacterial strains, especially with Root172  
26 which had the strongest effect on *Bs* colonisation (Sv\_ *Bs*\_ Root11: 1,921;  
27 Sv\_ *Bs*\_ Root172: 740; Figures 5C and S6; Table S8). Consistently, the expression of  
28 barley genes associated with terpenoid phytoalexin production was partially reduced in  
29 the multipartite interactions compared to *Bs* alone (Figure 5B). The barley root gene  
30 expression data shows that the cooperative action of Sv with bacteria protect barley roots

1 from *Bs* infection without extensive host transcriptional mobilization of immunity and  
2 defense metabolic pathways.

3 To test the above observation further, we investigated the immune modulatory properties  
4 of the beneficial *Sv* fungal and bacterial strains in roots of Arabidopsis and barley by using  
5 specific marker genes. In Arabidopsis, we observed a reduction of the expression of the  
6 gene encoding for the cytochrome P450 monooxygenase CYP81F2 involved in indole  
7 glucosinolate biosynthesis and defense (Pfalz et al., 2009) in *Bs* infected roots co-  
8 inoculated with *Sv* and/or the bacteria compared to *Bs* alone (Figure 3J). Similarly, the  
9 MAMP (microbe-associated molecular pattern) and fungal-responsive *At1g58420* gene  
10 (Nizam et al., 2019) displayed lower expression during the multipartite interactions (Figure  
11 3J), suggesting a reduced host response to *Bs* which correlates well with the pathogen  
12 load. In barley, we previously identified a *PR10* family gene (HORVU0Hr1G011720,  
13 hereafter referred to as *HvPR10*-like) as a robust marker for induced immune responses  
14 to *Bs* colonisation (Sarkar et al., 2019). RNA-seq and quantitative RT-PCR analyses  
15 confirmed that *HvPR10*-like expression was highly induced by *Bs* infection of barley roots.  
16 By contrast, *HvPR10*-like expression was weakly induced by *Sv* and/or the bacterial  
17 strains (Figure 2G). Despite the strong reduction in pathogen infection and disease  
18 symptoms upon co-inoculation with *Sv* and bacteria, we found that *Bs*-induced *HvPR10*-  
19 *like* expression was generally maintained in all combinations (Figure 2G). This result  
20 indicates that *HvPR10*-like expression is driven principally by the pathogen and impacted  
21 less by the presence of *Sv* and bacteria. Only co-inoculation of Root172 and *Sv*, which  
22 displayed the strongest protection against *Bs* infection, significantly lowered *Bs*-induced  
23 *HvPR10*-like gene expression. Hence, in conclusion, despite the general decreased  
24 barley transcriptional response to *Bs* and the lower pathogen load, the activation of  
25 specific immune responses such as the *HvPR10*-like gene were still in place in the  
26 presence of *Sv* and/or bacteria.

### 27 **Synergistic actions of *S. vermifera* and bacteria reduce the virulence potential of** 28 **endophytic *B. sorokiniana***

29 To examine mechanisms underlying the cooperative antagonistic behaviour of *Sv* and the  
30 bacteria towards *Bs*, we analysed the fungal transcriptomes during barley root

1 colonisation at 6 dpi. We previously reported that fungal transcriptome changes are driven  
2 mainly by their interactions with the host and that *Sv* effects on the *Bs* transcriptome occur  
3 mostly in the rhizosphere (Sarkar et al., 2019). Consistent with this notion, *Sv* or the  
4 bacterial treatments alone had little impact on the transcriptome of endophytic *Bs*. By  
5 contrast, the combined presence of *Sv* and Root11 had a strong impact on the *Bs*  
6 transcriptome with 65 up- and 786 down-regulated genes (Figure 6A; Table S8). DEG of  
7 *Bs* during root infection were grouped into nine clusters (Figures 6B and 6C; Table S8).  
8 The largest *Bs* cluster (#8) contained genes that were repressed compared to *Bs* infection  
9 of barley alone. Among the top 10 repressed genes in this cluster there were 4 *Bs* genes  
10 encoding for glycoside hydrolases (Table S8). This prompted us to look into the  
11 expression of all *Bs* CAZyme and effector genes.

12 We observed a general repression for these categories by the combined presence of *Sv*  
13 and Root11, possibly explaining the reduced *Bs* colonisation of roots (Figures 6D, 6E, S9  
14 and S10; Table S9). Notably, *Bs* gene cluster #7 (with genes specifically induced in the  
15 combined presence of *Sv\_Bs\_Root11*, Figure S13; Table S10) (Heine et al., 2018; Ola et  
16 al., 2014; Zhen et al., 2018) contained six up-regulated genes potentially participating in  
17 the production of antibacterial compounds related to chrysoxanthone, neosartorin and  
18 emodin. Hence, it is possible that *Bs* actively engages in antagonizing Root11 in the  
19 presence of *Sv* at 6 dpi. On the other hand, upon *Bs* co-inoculation with Root11 we  
20 observed induced expression of fungal effector and CAZyme genes (Figures 6D, 6E, S9,  
21 S10 and cluster 5 in Figure 6C) such as several AA9, GH43, CE5, PL1 and PL3 that are  
22 known to be enriched in plant associated fungi (Lahrmann et al., 2015; Zuccaro et al.,  
23 2011), which might explain the increased host immune response in this interaction.  
24 Transcriptional changes in endophytic *Sv* in response to the other microbes in barley roots  
25 were generally smaller and predominantly driven by *Bs* pathogen load and the associated  
26 barley immune response (Figure 7, S11 and S12; Table S7-9). This is in agreement with  
27 our previous data which suggests that *Sv* transcriptional response is likely driven by the  
28 changes in the plant host environment due to the pathogen activity rather than by direct  
29 interaction with *Bs* inside the root (Sarkar et al., 2019).

## 30 **Discussion**

1 In complex environments, plant-microbe interactions are not only shaped by the plant  
2 immune system (Dangl and Jones, 2001; Jones and Dangl, 2006; Pieterse et al., 2014)  
3 but also by microbe-microbe competition and co-operation, acting directly on or as an  
4 extension to plant immunity (Card et al., 2016; Snelders et al., 2018). Recent studies  
5 reveal the importance of root associated bacteria for plant survival and protection against  
6 fungi and oomycetes (Bulgarelli et al., 2013; Cha et al., 2016; Duran et al., 2018; Mendes  
7 et al., 2011; Santhanam et al., 2015). Much less attention has been paid to the role of  
8 widely distributed beneficial endophytic fungi in a multi-kingdom context. Here we show  
9 that the effects on host growth and protection that are conferred by the Sebaciniales  
10 member *S. vermifera* in bipartite and tripartite interactions (Deshmukh et al., 2006; Sarkar  
11 et al., 2019) are retained in a community context. The observed robust protective function  
12 and stability of *Sv* colonisation is likely due to its ability to adapt to changes in the plant  
13 host environment (Sarkar et al., 2019). The strength of its protection against an aggressive  
14 root fungal pathogen (*Bs*) is underscored by the observation that *Sv* can functionally  
15 replace core bacterial microbiota members in mitigating pathogen infection and disease  
16 symptoms in distantly related plant hosts. This finding is in accordance with Arabidopsis  
17 root microbiota samplings across European habitats which shows Sebaciniales fungi to be  
18 of low abundance but consistently present in the host roots and the rhizosphere. Our data  
19 highlight the potential importance of less abundant but widespread root fungal endophytes  
20 in maintaining plant host physiological fitness in nature, thereby emphasizing that  
21 numerically inconspicuous microbes can play a significant role in microbiota functional  
22 studies and should be considered when designing SynComs with multiple traits, such as  
23 resilience and specific beneficial functions.

24 Strikingly, the presence of *Sv* also reduced the negative effect caused by the *HvSynCom*  
25 in Arabidopsis (Figures 3E-J), revealing a more general protective activity of root  
26 endophytic fungi. The induction of cell death by the barley derived SynCom in Arabidopsis  
27 could be due to the presence of specific bacterial strains that are absent in the *AtSynCom*.  
28 One such bacterial group that is well represented in the *HvSynCom* but absent in the  
29 *AtSynCom* used in this study is the Pseudomonadales. Several members of this group  
30 are reported to be pathogenic (Xin et al., 2018) whereas others with very few genome  
31 differences promote plant growth and exert biocontrol activities against different fungal



1 pathogens (Mercado-Blanco and Bakker, 2007). However, we did not observe an increase  
2 in ion leakage upon inoculation with the *Pseudomonas* strain bi08 or other members of  
3 the *HvSynCom* when inoculated alone (Figure S4). The pathogenicity of a single bacterial  
4 strain is likely to be suppressed in a community context, as observed for *Bs* (Figures 2  
5 and 3). Thus, another explanation to the negative effects of the *HvSynCom* in Arabidopsis  
6 but not in barley might be a lack of adaptation to Arabidopsis. This notion is supported by  
7 a recent analysis which detected a clear signature of host preferences among commensal  
8 bacteria from diverse taxonomic groups, including Pseudomonadales in Arabidopsis and  
9 *Lotus japonicus* (Wippel et al., 2021).

10 Our transcriptomic analyses show that effects of the tested bacterial strains in tripartite  
11 associations differ substantially. The general decreased barley transcriptional response  
12 to the pathogen driven by the Rhizobiales strain Root172 (Figure 5C) and the lysis of the  
13 fungal matrix at the host rhizoplane suggest that this bacterial strain act mostly directly on  
14 *Bs* (Figure 4). This is also supported by the strong antagonism of *Bs* growth irrespective  
15 of the presence of a host plant (Figures 2A, 2E and 2F). Taken together, these results  
16 point to Root172 as a possible biocontrol agent against *Bs* and potentially other root-  
17 infecting pathogens. The impact of Root172 contrasted strikingly with that of the Bacillales  
18 strain Root11 which did not limit *Bs* growth but rather enhanced *Bs* pathogenicity in barley.  
19 Notably, combining these two bacterial strains with *Sv* led to a restriction of *Bs* that  
20 exceeded the protective benefits of *Sv* and the bacteria alone (Figure 3C). These  
21 synergistic beneficial effects are decoupled from extensive host transcriptional  
22 reprogramming (Figure 5C) and cannot be solely explained by enhanced *Sv* growth  
23 (Figure 2F) as speculated for other fungal-bacterial synergistic beneficial effects (Del  
24 Barrio-Duque et al., 2019). Our transcriptional and phenotypic data further suggest that  
25 *Sv* – bacterial synergism in protecting host roots have also a component which is additive  
26 because the underlying antagonistic mechanisms displayed by the fungal root endophyte  
27 and the bacterial strains are likely to be distinct and explained mainly by direct microbe-  
28 microbe interactions outside the plant. Nonetheless we have observed a higher level of  
29 inter-kingdom mediated antagonism on *Bs* in presence of the host. This suggests a minor  
30 but relevant host-dependent effect which needs to be addressed (Figures 2A, 2E and 2F).

1 At the early time point of 6 dpi, growth promotion was only observed in the combined  
2 presence of *Sv* and certain bacterial strains with the strongest effect during co-inoculation  
3 with Root11 in barley and Root172 in Arabidopsis (Figures 2C and S2). Furthermore,  
4 growth promotion required living microbes, as co-inoculation with heat-inactivated  
5 bacteria did not increase the root fresh weight in barley. Commensal bacteria in the  
6 rhizosphere can trigger plant growth promotion and resistance to pathogen (Pieterse et  
7 al., 2014; Souza et al., 2015; Vlot et al., 2020). Among them, strains belonging to the  
8 genus *Bacillus* are often used as bioagents due to their function in eliciting ISR (induced  
9 systemic resistance) as well as growth promotion (Kloepper et al., 2004; Vlot et al., 2020).  
10 However, plant growth promoting bacteria (PGB) and Sebaciniales mediated growth  
11 promotion are often reported during later stages of colonisation. The early host growth  
12 enhancement observed with *Sv* and the bacteria might thus confer a competitive  
13 advantage for plants in nature. It is striking that the growth promoting effect is not  
14 accompanied by an extensive host transcriptional response with only 13 barley DEG being  
15 specific to this condition (Figure 5C; Table S7). Interestingly, several of these genes  
16 display differential expression across barley accessions (analysed using Genevestigator)  
17 compared to the cultivar Golden Promise. It would therefore be informative to test growth  
18 outcomes of combined *Sv* and e.g. Root11 inoculation in different barley  
19 varieties/ecotypes. The resulting synergistic inter-kingdom benefits in plant protection  
20 against fungal disease and in plant physiology (Figures 2 and 3) are in line with studies of  
21 the Sebaciniales fungus *S. indica* with single bacterial strains on tomato (Del Barrio-Duque  
22 et al., 2019; Kumar et al., 2012; Sarma et al., 2011), rice (Dabral et al., 2020), barley  
23 (Varma et al., 2012) and chickpea (Mansotra et al., 2015) and underlay the broad  
24 functional relevance for fungi of the order Sebaciniales in plant health in multi-kingdom  
25 environments.

26 The deployment of microbiota as biocontrol agents for crop protection and enhancement  
27 is an ancient concept (Vessey, 2003) which is gaining increased relevance in modern  
28 agriculture (Finkel et al., 2017; Vannier et al., 2019). Plant protection and growth  
29 promotion properties conferred by microbial consortia have been found to be more  
30 resilient than use of single strains (Finkel et al., 2017). Moreover, Duran et al. 2018  
31 showed that a complex SynCom consisting of bacteria, fungi and Oomycetes led to

1 strongest beneficial effects on *Arabidopsis* growth and survival compared to mono-  
2 kingdom or small SynCom associations and hypothesized that selective pressures over  
3 evolutionary time favor inter-kingdom microbe-microbe interactions over interactions with  
4 single microbial strains (Duran et al., 2018). Inter-kingdom associations are frequently  
5 observed between members of the *Sebacinales* and bacteria. Different *Sebacinales*  
6 species host endobacteria of the orders *Bacillales* (genera *Paenibacillus*),  
7 *Pseudomonadales* (*Acinetobacter*) and *Actinomycetales* (*Rhodococcus*) and its close  
8 relative *S. indica* hosts an endobacteria of the order *Rhizobiales* (*Rhizobium radibacter*)  
9 (Sharma et al., 2008). Beneficial effects of these intimate inter-kingdom interactions on  
10 the plant host and the fungus itself were described between *S. indica* and *R. radibacter*  
11 (Glaeser et al., 2016; Sharma et al., 2008) and for interactions between arbuscular  
12 mycorrhizal fungi and bacteria belonging to different species of the orders Proteobacteria  
13 (*Rhizobiales*) and Firmicutes (*Bacillales*) (Artursson et al., 2006). Considering the  
14 pervasiveness of beneficial effects conferred by *Sebacinales* and bacteria compared to  
15 the vulnerability of *Bs* in a multipartite context, our data support the hypothesis that  
16 establishment of beneficial inter-kingdom interactions in the plant microbiota is an  
17 evolutionary conserved and robust trait.

## 18 **Acknowledgments**

19 We thank Paul Schulze-Lefert and the DECRyPT community (SPP 2125) for providing the  
20 bacterial strains used in this study. LM was supported by the Max-Planck-Gesellschaft  
21 through the International Max Planck Research School (IMPRS) on ‘Understanding  
22 Complex Plant Traits using Computational and Evolutionary Approaches’ and the  
23 University of Cologne. AZ and JEP acknowledge support from the Cluster of Excellence  
24 on Plant Sciences (CEPLAS) funded by the Deutsche Forschungsgemeinschaft (DFG,  
25 German Research Foundation) under Germany’s Excellence Strategy – EXC 2048/1 –  
26 Project ID: 390686111 and projects ZU 263/11-1 and PA 917/8-1 (SPP DECRyPT). JEP  
27 and CU acknowledge The Max Planck Society for additional support. Graphical  
28 illustrations were designed with the BioRender online tool. SM would like to express our  
29 gratitude to Prof. Francis Martin for allowing us to use the secretome prediction and visual  
30 omics workflow on the computing cluster at INRAE Nancy, France.

## 31 **References**

- 1 Almario, J., Jeena, G., Wunder, J., Langen, G., Zuccaro, A., Coupland, G., and Bucher, M. (2017). Root-  
2 associated fungal microbiota of nonmycorrhizal *Arabidopsis thaliana* and its contribution to plant phosphorus  
3 nutrition. *Proc Natl Acad Sci U S A*. 114(44), E9403-E9412.
- 4 Artursson, V., Finlay, R.D., and Jansson, J.K. (2006). Interactions between arbuscular mycorrhizal fungi and  
5 bacteria and their potential for stimulating plant growth. *Environ Microbiol*. 8(1), 1-10.
- 6 Bai, Y., Muller, D.B., Srinivas, G., Garrido-Oter, R., Potthoff, E., Rott, M., Dombrowski, N., Munch, P.C.,  
7 Spaepen, S., Remus-Emsermann, M., et al. (2015). Functional overlap of the *Arabidopsis thaliana* leaf and root  
8 microbiota. *Nature*. 528(7582), 364-369.
- 9 Barazani, O., Benderoth, M., Groten, K., Kuhlemeier, C., and Baldwin, I.T. (2005). *Piriformospora indica* and  
10 *Sebacina vermifera* increase growth performance at the expense of herbivore resistance in *Nicotiana*  
11 *attenuata*. *Oecologia*. 146(2), 234-243.
- 12 Bulgarelli, D., Garrido-Oter, R., Munch, P.C., Weiman, A., Droge, J., Pan, Y., McHardy, A.C., and Schulze-  
13 Lefert, P. (2015). Structure and function of the bacterial root microbiota in wild and domesticated barley.  
14 *Cell Host Microbe*. 17(3), 392-403.
- 15 Bulgarelli, D., Schlaeppli, K., Spaepen, S., Ver Loren van Themaat, E., and Schulze-Lefert, P. (2013). Structure  
16 and functions of the bacterial microbiota of plants. *Annu Rev Plant Biol*. 64, 807-838.
- 17 Card, S., Johnson, L., Teasdale, S., and Caradus, J. (2016). Deciphering endophyte behaviour: the link  
18 between endophyte biology and efficacious biological control agents. *FEMS Microbiol Ecol*. 92(8).
- 19 Carlson, M. (2016). KEGG.db: A set of annotation maps for KEGG. R package version 3.2.3.
- 20 Carlson, M. (2019). GO.db: A set of annotation maps describing the entire Gene Ontology. R package  
21 version 3.8.2.
- 22 Carlson, M., Liu, T., Lin, C., Falcon, S., Zhang, J., and MacDonald, J. (2018). PFAM.db: A set of protein ID  
23 mappings for PFAM. R package version 3.6.0.
- 24 Cha, J.Y., Han, S., Hong, H.J., Cho, H., Kim, D., Kwon, Y., Kwon, S.K., Crusemann, M., Bok Lee, Y., Kim, J.F.,  
25 et al. (2016). Microbial and biochemical basis of a *Fusarium* wilt-suppressive soil. *ISME J*. 10(1), 119-129.
- 26 Chen, S., Zhou, Y., Chen, Y., and Gu, J. (2018). fastp: an ultra-fast all-in-one FASTQ preprocessor.  
27 *Bioinformatics*. 34(17), i884-i890.
- 28 Dabral, S., Saxena, S.C., Choudhary, D.K., Bandyopadhyay, P., Sahoo, R.K., Tuteja, N., and Nath, M. (2020).  
29 Synergistic inoculation of *Azotobacter vinelandii* and *Serendipita indica* augmented rice growth. *Symbiosis*.  
30 81(2), 139-148.
- 31 Dangl, J.L., and Jones, J.D. (2001). Plant pathogens and integrated defence responses to infection. *Nature*.  
32 411(6839), 826-833.
- 33 Del Barrio-Duque, A., Ley, J., Samad, A., Antonielli, L., Sessitsch, A., and Compant, S. (2019). Beneficial  
34 Endophytic Bacteria-*Serendipita indica* Interaction for Crop Enhancement and Resistance to  
35 Phytopathogens. *Front Microbiol*. 10, 2888.
- 36 Delgado-Baquerizo, M., Guerra, C.A., Cano-Diaz, C., Egidi, E., Wang, J.T., Eisenhauer, N., Singh, B.K., and  
37 Maestre, F.T. (2020). The proportion of soil-borne pathogens increases with warming at the global scale.  
38 *Nat Clim Change*. 10(6), 550-+.
- 39 Deshmukh, S., Huckelhoven, R., Schafer, P., Imani, J., Sharma, M., Weiss, M., Waller, F., and Kogel, K.H.  
40 (2006). The root endophytic fungus *Piriformospora indica* requires host cell death for proliferation during  
41 mutualistic symbiosis with barley. *Proc Natl Acad Sci U S A*. 103(49), 18450-18457.
- 42 Duran, P., Thiergart, T., Garrido-Oter, R., Agler, M., Kemen, E., Schulze-Lefert, P., and Hacquard, S. (2018).  
43 Microbial Interkingdom Interactions in Roots Promote *Arabidopsis thaliana* Survival. *Cell*. 175(4), 973-983 e914.
- 44 Duveiller, E., and Gilchrist, L. (1994). Production constraints due to *Bipolaris sorokiniana* in wheat: current  
45 situation and future prospects. In: *Wheat in Heat-stressed Environments: Irrigated, Dry Areas and Rice-  
46 Wheat Farming Systems*, S. DA, and H. GP eds. (CIMMYT, Mexico, DF), pp. 343-352.
- 47 Edwards, J., Johnson, C., Santos-Medellin, C., Lurie, E., Podishetty, N.K., Bhatnagar, S., Eisen, J.A., and  
48 Sundaresan, V. (2015). Structure, variation, and assembly of the root-associated microbiomes of rice. *Proc  
49 Natl Acad Sci U S A*. 112(8), E911-920.

- 1 Fesel, P.H., and Zuccaro, A. (2016). Dissecting endophytic lifestyle along the parasitism/mutualism  
2 continuum in *Arabidopsis*. *Curr Opin Microbiol.* 32, 103-112.
- 3 Finkel, O.M., Castrillo, G., Herrera Paredes, S., Salas Gonzalez, I., and Dangl, J.L. (2017). Understanding and  
4 exploiting plant beneficial microbes. *Curr Opin Plant Biol.* 38, 155-163.
- 5 Finn, R.D., Coggill, P., Eberhardt, R.Y., Eddy, S.R., Mistry, J., Mitchell, A.L., Potter, S.C., Punta, M., Qureshi,  
6 M., Sangrador-Vegas, A., et al. (2016). The Pfam protein families database: towards a more sustainable  
7 future. *Nucleic Acids Res.* 44(D1), D279-285.
- 8 Fitzpatrick, C.R., Copeland, J., Wang, P.W., Guttman, D.S., Kotanen, P.M., and Johnson, M.T.J. (2018).  
9 Assembly and ecological function of the root microbiome across angiosperm plant species. *Proc Natl Acad  
10 Sci U S A.* 115(6), E1157-E1165.
- 11 Franken, P. (2012). The plant strengthening root endophyte *Piriformospora indica*: potential application  
12 and the biology behind. *Appl Microbiol Biotechnol.* 96(6), 1455-1464.
- 13 Gehlenborg, N., and Conway, J. (2019). A More Scalable Alternative to Venn and Euler Diagrams for  
14 Visualizing Intersecting Sets.
- 15 Gene Ontology, C. (2015). Gene Ontology Consortium: going forward. *Nucleic Acids Res.* 43(Database  
16 issue), D1049-1056.
- 17 Ghimire, S.R., Charlton, N.D., and Craven, K.D. (2009). The Mycorrhizal Fungus, *Sebacina vermifera*,  
18 Enhances Seed Germination and Biomass Production in Switchgrass (*Panicum virgatum* L). *Bioenerg Res.*  
19 2(1-2), 51-58.
- 20 Glaeser, S.P., Imani, J., Alabid, I., Guo, H., Kumar, N., Kampfer, P., Hardt, M., Blom, J., Goesmann, A.,  
21 Rothballer, M., et al. (2016). Non-pathogenic *Rhizobium radiobacter* F4 deploys plant beneficial activity  
22 independent of its host *Piriformospora indica*. *ISME J.* 10(4), 871-884.
- 23 Harbort, C.J., Hashimoto, M., Inoue, H., Niu, Y., Guan, R., Rombola, A.D., Kopriva, S., Voges, M., Sattely,  
24 E.S., Garrido-Oter, R., et al. (2020). Root-Secreted Coumarins and the Microbiota Interact to Improve Iron  
25 Nutrition in *Arabidopsis*. *Cell Host Microbe.* 28(6), 825-837 e826.
- 26 Heine, D., Holmes, N.A., Worsley, S.F., Santos, A.C.A., Innocent, T.M., Scherlach, K., Patrick, E.H., Yu, D.W.,  
27 Murrell, J.C., Viera, P.C., et al. (2018). Chemical warfare between leafcutter ant symbionts and a co-  
28 evolved pathogen. *Nat Commun.* 9(1), 2208.
- 29 Hermosa, R., Viterbo, A., Chet, I., and Monte, E. (2012). Plant-beneficial effects of *Trichoderma* and of its  
30 genes. *Microbiology (Reading).* 158(Pt 1), 17-25.
- 31 Hiruma, K., Gerlach, N., Sacristan, S., Nakano, R.T., Hacquard, S., Kracher, B., Neumann, U., Ramirez, D.,  
32 Bucher, M., O'Connell, R.J., et al. (2016). Root Endophyte *Colletotrichum tofieldiae* Confers Plant Fitness  
33 Benefits that Are Phosphate Status Dependent. *Cell.* 165(2), 464-474.
- 34 Jones, J.D., and Dangl, J.L. (2006). The plant immune system. *Nature.* 444(7117), 323-329.
- 35 Kloepper, J.W., Ryu, C.M., and Zhang, S. (2004). Induced Systemic Resistance and Promotion of Plant  
36 Growth by *Bacillus* spp. *Phytopathology.* 94(11), 1259-1266.
- 37 Kolde, R. (2019). Implementation of heatmaps that offers more control over dimensions and appearance.
- 38 Kumar, V., Sarma, M.V., Saharan, K., Srivastava, R., Kumar, L., Sahai, V., Bisaria, V.S., and Sharma, A.K.  
39 (2012). Effect of formulated root endophytic fungus *Piriformospora indica* and plant growth promoting  
40 rhizobacteria fluorescent pseudomonads R62 and R81 on *Vigna mungo*. *World J Microbiol Biotechnol.*  
41 28(2), 595-603.
- 42 Lahrman, U., Strehmel, N., Langen, G., Frerigmann, H., Leson, L., Ding, Y., Scheel, D., Herklotz, S., Hilbert,  
43 M., and Zuccaro, A. (2015). Mutualistic root endophytism is not associated with the reduction of  
44 saprotrophic traits and requires a noncompromised plant innate immunity. *New Phytol.* 207(3), 841-857.
- 45 Lemanceau, P., Blouin, M., Muller, D., and Moenne-Loccoz, Y. (2017). Let the Core Microbiota Be  
46 Functional. *Trends in Plant Science.* 22(7), 583-595.
- 47 Lombard, V., Golaconda Ramulu, H., Drula, E., Coutinho, P.M., and Henrissat, B. (2014). The carbohydrate-  
48 active enzymes database (CAZy) in 2013. *Nucleic Acids Res.* 42(Database issue), D490-495.

- 1 Love, M.I., Huber, W., and Anders, S. (2014). Moderated estimation of fold change and dispersion for RNA-  
2 seq data with DESeq2. *Genome Biol.* 15(12), 550.
- 3 Lundberg, D.S., Lebeis, S.L., Paredes, S.H., Yourstone, S., Gehring, J., Malfatti, S., Tremblay, J.,  
4 Engelbrektson, A., Kunin, V., Del Rio, T.G., et al. (2012). Defining the core *Arabidopsis thaliana* root  
5 microbiome. *Nature.* 488(7409), 86-90.
- 6 Manamgoda, D.S., Rossman, A.Y., Castlebury, L.A., Crous, P.W., Madrid, H., Chukeatirote, E., and Hyde,  
7 K.D. (2014). The genus *Bipolaris*. *Stud Mycol.* 79, 221-288.
- 8 Mansotra, P., Sharma, P., and Sharma, S. (2015). Bioaugmentation of *Mesorhizobium cicer*, *Pseudomonas*  
9 spp. and *Piriformospora indica* for Sustainable Chickpea Production. *Physiol Mol Biol Plants.* 21(3), 385-  
10 393.
- 11 Mendes, R., Kruijt, M., de Bruijn, I., Dekkers, E., van der Voort, M., Schneider, J.H., Piceno, Y.M., DeSantis,  
12 T.Z., Andersen, G.L., Bakker, P.A., et al. (2011). Deciphering the rhizosphere microbiome for disease-  
13 suppressive bacteria. *Science.* 332(6033), 1097-1100.
- 14 Mercado-Blanco, J., and Bakker, P.A.H.M. (2007). Interactions between plants and beneficial  
15 *Pseudomonas* spp.: exploiting bacterial traits for crop protection. *Antonie van Leeuwenhoek.* 92(4), 367-  
16 389.
- 17 Miyauchi, S., Hage, H., Drula, E., Lesage-Meessen, L., Berrin, J.G., Navarro, D., Favel, A., Chaduli, D., Grisel,  
18 S., Haon, M., et al. (2020). Conserved white-rot enzymatic mechanism for wood decay in the  
19 Basidiomycota genus *Pycnoporus*. *DNA Res.* 27(2).
- 20 Miyauchi, S., Navarro, D., Grigoriev, I.V., Lipzen, A., Riley, R., Chevret, D., Grisel, S., Berrin, J.G., Henrissat,  
21 B., and Rosso, M.N. (2016). Visual Comparative Omics of Fungi for Plant Biomass Deconstruction. *Front*  
22 *Microbiol.* 7, 1335.
- 23 Miyauchi, S., Navarro, D., Grisel, S., Chevret, D., Berrin, J.G., and Rosso, M.N. (2017). The integrative omics  
24 of white-rot fungus *Pycnoporus coccineus* reveals co-regulated CAZymes for orchestrated lignocellulose  
25 breakdown. *PLoS One.* 12(4), e0175528.
- 26 Miyauchi, S., Rancon, A., Drula, E., Hage, H., Chaduli, D., Favel, A., Grisel, S., Henrissat, B., Herpoel-Gimbert,  
27 I., Ruiz-Duenas, F.J., et al. (2018). Integrative visual omics of the white-rot fungus *Polyporus brumalis*  
28 exposes the biotechnological potential of its oxidative enzymes for delignifying raw plant biomass.  
29 *Biotechnol Biofuels.* 11, 201.
- 30 Nizam, S., Qiang, X., Wawra, S., Nostadt, R., Getzke, F., Schwanke, F., Dreyer, I., Langen, G., and Zuccaro,  
31 A. (2019). *Serendipita indica* E5'NT modulates extracellular nucleotide levels in the plant apoplast and  
32 affects fungal colonization. *EMBO Rep.* 20(2).
- 33 Nostadt, R., Hilbert, M., Nizam, S., Rovenich, H., Wawra, S., Martin, J., Kupper, H., Mijovilovich, A., Ursinus,  
34 A., Langen, G., et al. (2020). A secreted fungal histidine- and alanine-rich protein regulates metal ion  
35 homeostasis and oxidative stress. *New Phytol.*
- 36 Oberwinkler, F., Riess, K., Bauer, R., Selosse, M.-A., Weiß, M., Garnica, S., and Zuccaro, A. (2013). Enigmatic  
37 *Sebacinales*. *Mycol Prog.* 12(1), 1-27.
- 38 Ogata, H., Goto, S., Sato, K., Fujibuchi, W., Bono, H., and Kanehisa, M. (1999). KEGG: Kyoto Encyclopedia  
39 of Genes and Genomes. *Nucleic Acids Res.* 27(1), 29-34.
- 40 Oksanen, J., Guillaume, B., Friendly, M., Kindt, R., Legendre, P., McGlenn, D., Minchin, P.R., O'Hara, R.B.,  
41 Simpson, G.L., Solymos, P., et al. (2020). *vegan: Community Ecology Package*.
- 42 Ola, A.R.B., Debbab, A., Aly, A.H., Mandi, A., I., Z., Hamacher, A., Kassack, M.U., Brötz-Oesterhelt, I., Kurtan,  
43 T., and Proksch, P. (2014). Absolute configuration and antibiotic activity of neosartorin from the  
44 endophytic fungus *Aspergillus fumigati*affinis. *Tetrahedron Letters.* 55(5), 1020-1023.
- 45 Pedersen, T.L. (2020). *ggraph: An Implementation of Grammar of Graphics for Graphs and Networks*. R  
46 package version 2.0.3. . <https://CRAN.R-project.org/package=ggraph>.
- 47 Pellegrin, C., Morin, E., Martin, F.M., and Veneault-Fourrey, C. (2015). Comparative Analysis of Secretomes  
48 from Ectomycorrhizal Fungi with an Emphasis on Small-Secreted Proteins. *Front Microbiol.* 6, 1278.

- 1 Peter Wittek, S.C.G., Ik Soo Lim, Li Zhao (2017). somoclu: An Efficient Parallel Library for Self-Organizing  
2 Maps. *Journal of Statistical Software*. 78(9).
- 3 Pfalz, M., Vogel, H., and Kroymann, J. (2009). The gene controlling the indole glucosinolate modifier1  
4 quantitative trait locus alters indole glucosinolate structures and aphid resistance in *Arabidopsis*. *Plant*  
5 *Cell*. 21(3), 985-999.
- 6 Pieterse, C.M., Zamioudis, C., Berendsen, R.L., Weller, D.M., Van Wees, S.C., and Bakker, P.A. (2014).  
7 Induced systemic resistance by beneficial microbes. *Annu Rev Phytopathol*. 52, 347-375.
- 8 Rafiqi, M., Jelonek, L., Akum, N.F., Zhang, F., and Kogel, K.H. (2013). Effector candidates in the secretome  
9 of *Piriformospora indica*, a ubiquitous plant-associated fungus. *Frontiers in plant science*. 4, 228.
- 10 Rawlings, N.D., Barrett, A.J., Thomas, P.D., Huang, X., Bateman, A., and Finn, R.D. (2018). The MEROPS  
11 database of proteolytic enzymes, their substrates and inhibitors in 2017 and a comparison with peptidases  
12 in the PANTHER database. *Nucleic Acids Res*. 46(D1), D624-D632.
- 13 Robertson-Albertyn, S., Concas, F., Brown, L.H., Orr, J.N., Abbott, J.C., George, T.S., and Bulgarelli, D.  
14 (2021). A genome-annotated bacterial collection of the barley rhizosphere microbiota. *bioRxiv*.  
15 2021.2003.2010.434690.
- 16 Ron Wehrens, L.M.C.B. (2007). Self- and Super-organizing Maps in R: The kohonen Package. *Journal of*  
17 *Statistical Software*. 21(5).
- 18 Santhanam, R., Luu, V.T., Weinhold, A., Goldberg, J., Oh, Y., and Baldwin, I.T. (2015). Native root-associated  
19 bacteria rescue a plant from a sudden-wilt disease that emerged during continuous cropping. *Proc Natl*  
20 *Acad Sci U S A*. 112(36), E5013-5020.
- 21 Sarkar, D., Rovenich, H., Jeena, G., Nizam, S., Tissier, A., Balcke, G.U., Mahdi, L.K., Bonkowski, M., Langen,  
22 G., and Zuccaro, A. (2019). The inconspicuous gatekeeper: endophytic *Serendipita vermifera* acts as  
23 extended plant protection barrier in the rhizosphere. *New Phytol*. 224(2), 886-901.
- 24 Sarma, M.V., Kumar, V., Saharan, K., Srivastava, R., Sharma, A.K., Prakash, A., Sahai, V., and Bisaria, V.S.  
25 (2011). Application of inorganic carrier-based formulations of fluorescent pseudomonads and  
26 *Piriformospora indica* on tomato plants and evaluation of their efficacy. *J Appl Microbiol*. 111(2), 456-466.
- 27 Sharma, M., Schmid, M., Rothballer, M., Hause, G., Zuccaro, A., Imani, J., Kampfer, P., Domann, E., Schafer,  
28 P., Hartmann, A., et al. (2008). Detection and identification of bacteria intimately associated with fungi of  
29 the order Sebaciales. *Cell Microbiol*. 10(11), 2235-2246.
- 30 Snelders, N.C., Kettles, G.J., Rudd, J.J., and Thomma, B. (2018). Plant pathogen effector proteins as  
31 manipulators of host microbiomes? *Molecular plant pathology*. 19(2), 257-259.
- 32 Sonesson, C., Love, M.I., and Robinson, M.D. (2015). Differential analyses for RNA-seq: transcript-level  
33 estimates improve gene-level inferences. *F1000Res*. 4, 1521.
- 34 Souza, R., Ambrosini, A., and Passaglia, L.M. (2015). Plant growth-promoting bacteria as inoculants in  
35 agricultural soils. *Genet Mol Biol*. 38(4), 401-419.
- 36 Spaepen, S., Vanderleyden, J., and Remans, R. (2007). Indole-3-acetic acid in microbial and microorganism-  
37 plant signaling. *FEMS Microbiol Rev*. 31(4), 425-448.
- 38 Tatusov, R.L., Fedorova, N.D., Jackson, J.D., Jacobs, A.R., Kiryutin, B., Koonin, E.V., Krylov, D.M., Mazumder,  
39 R., Mekhedov, S.L., Nikolskaya, A.N., et al. (2003). The COG database: an updated version includes  
40 eukaryotes. *BMC Bioinformatics*. 4, 41.
- 41 Tedersoo, L., Bahram, M., Ryberg, M., Otsing, E., Koljalg, U., and Abarenkov, K. (2014). Global biogeography  
42 of the ectomycorrhizal /sebacia lineage (Fungi, Sebaciales) as revealed from comparative phylogenetics  
43 analyses. *Mol Ecol*.
- 44 Thiergart, T., Duran, P., Ellis, T., Vannier, N., Garrido-Oter, R., Kemen, E., Roux, F., Alonso-Blanco, C., Agren,  
45 J., Schulze-Lefert, P., et al. (2020a). Root microbiota assembly and adaptive differentiation among  
46 European *Arabidopsis* populations. *Nat Ecol Evol*. 4(1), 122-131.
- 47 Thiergart, T., Duran, P., Ellis, T., Vannier, N., Garrido-Oter, R., Kemen, E., Roux, F., Alonso-Blanco, C., Agren,  
48 J., Schulze-Lefert, P., et al. (2020b). Root microbiota assembly and adaptive differentiation among  
49 European *Arabidopsis* populations. *Nat Ecol Evol*. 4(1), 122-+.

- 1 Thomas, P.D., Campbell, M.J., Kejariwal, A., Mi, H., Karlak, B., Daverman, R., Diemer, K., Muruganujan, A.,  
2 and Narechania, A. (2003). PANTHER: a library of protein families and subfamilies indexed by function.  
3 *Genome Res.* 13(9), 2129-2141.
- 4 Vannier, N., Agler, M., and Hacquard, S. (2019). Microbiota-mediated disease resistance in plants. *PLoS*  
5 *Pathog.* 15(6), e1007740.
- 6 Varma, A., Bakshi, M., Lou, B., Hartmann, A., and Oelmueller, R. (2012). Piriformospora indica: A Novel  
7 Plant Growth-Promoting Mycorrhizal Fungus. *Agricultural Research.* 1(2), 117-131.
- 8 Vessey, J.K. (2003). Plant growth promoting rhizobacteria as biofertilizers. *Plant and Soil.* 255(2), 571-586.
- 9 Vlot, A.C., Sales, J.H., Lenk, M., Bauer, K., Brambilla, A., Sommer, A., Chen, Y., Wenig, M., and Nayem, S.  
10 (2020). Systemic propagation of immunity in plants. *New Phytol.*
- 11 Vorholt, J.A., Vogel, C., Carlstrom, C.I., and Muller, D.B. (2017). Establishing Causality: Opportunities of  
12 Synthetic Communities for Plant Microbiome Research. *Cell Host Microbe.* 22(2), 142-155.
- 13 Waller, F., Mukherjee, K., Deshmukh, S.D., Achatz, B., Sharma, M., Schaefer, P., and Kogel, K.H. (2008).  
14 Systemic and local modulation of plant responses by Piriformospora indica and related Sebaciales  
15 species. *J Plant Physiol.* 165(1), 60-70.
- 16 Wawra, S., Fesel, P., Widmer, H., Timm, M., Seibel, J., Leson, L., Kesseler, L., Nostadt, R., Hilbert, M.,  
17 Langen, G., et al. (2016). The fungal-specific beta-glucan-binding lectin FGB1 alters cell-wall composition  
18 and suppresses glucan-triggered immunity in plants. *Nature communications.* 7, 13188.
- 19 Weiss, M., Waller, F., Zuccaro, A., and Selosse, M.A. (2016a). Sebaciales - one thousand and one  
20 interactions with land plants. *New Phytol.* 211(1), 20-40.
- 21 Weiss, M., Waller, F., Zuccaro, A., and Selosse, M.A. (2016b). Sebaciales - one thousand and one  
22 interactions with land plants. *New Phytologist.* 211(1), 20-40.
- 23 Whipps, J.M. (2001). Microbial interactions and biocontrol in the rhizosphere. *Journal of Experimental*  
24 *Botany.* 52(suppl\_1), 487-511.
- 25 Wippel, K., Tao, K., Niu, Y., Zgadzaj, R., Guan, R., Dahms, E., Zhang, P., Jensen, D.B., Logemann, E., Radutoiu,  
26 S., et al. (2021). Host preference and invasiveness of commensals in the *Lotus* and  
27 *Arabidopsis* root microbiota. *bioRxiv.* 2021.2001.2012.426357.
- 28 Xin, X.-F., Kvitko, B., and He, S.Y. (2018). *Pseudomonas syringae*: what it takes to be a pathogen. *Nature*  
29 *Reviews Microbiology.* 16(5), 316-328.
- 30 Zhang, Y., Parmigiani, G., and Johnson, W.E. (2020). ComBat-seq: batch effect adjustment for RNA-seq  
31 count data. *NAR Genom Bioinform.* 2(3), lqaa078.
- 32 Zhen, X., Gong, T., Wen, Y.H., Yan, D.J., Chen, J.J., and Zhu, P. (2018). Chrysoxanthones A(-)C, Three New  
33 Xanthone(-)Chromanone Heterdimers from Sponge-Associated *Penicillium chrysogenum* HLS111 Treated  
34 with Histone Deacetylase Inhibitor. *Mar Drugs.* 16(10).
- 35 Zuccaro, A. (2020). Plant phosphate status drives host microbial preferences: a trade-off between fungi  
36 and bacteria. *Embo J.* 39(2), e104144.
- 37 Zuccaro, A., Lahrmann, U., Guldener, U., Langen, G., Pfiffi, S., Biedenkopf, D., Wong, P., Samans, B., Grimm,  
38 C., Basiewicz, M., et al. (2011). Endophytic life strategies decoded by genome and transcriptome analyses  
39 of the mutualistic root symbiont *Piriformospora indica*. *PLoS Pathog.* 7(10), e1002290.
- 40 Zuccaro, A., Lahrmann, U., and Langen, G. (2014). Broad compatibility in fungal root symbioses. *Current*  
41 *opinion in plant biology.* 20, 135-145.



bioRxiv preprint doi: <https://doi.org/10.1101/2021.03.18.435831>; this version posted March 18, 2021. The copyright holder for this preprint (which was not certified by peer review) is the author/funder, who has granted bioRxiv a license to display the preprint in perpetuity. It is made available under aCC-BY-NC-ND 4.0 International license.

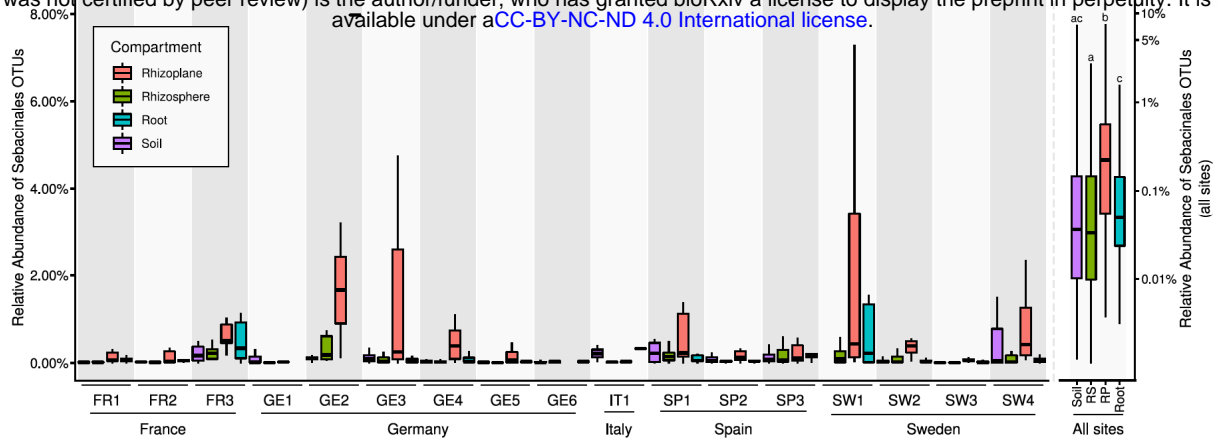

**Fig. 1: Abundance of Sebaciniales in *Arabidopsis* roots of different European locations** A) Analysis of fungal (ITS1) OTUs belonging to the Sebaciniales order from sequencing data obtained from samples of soil and root-associated microbial communities across 3 years and 17 European sites where naturally occurring *A. thaliana* populations were found (Thiergart et al., 2020). A non-parametric Kruskal-Wallis test with a Dunn's test for multiple comparisons on relative abundances of Sebaciniales OTUs in different compartments, aggregated for all site, shows that this fungal taxon is enriched in the rhizoplane compartment of *A. thaliana* roots compared to the other compartments.

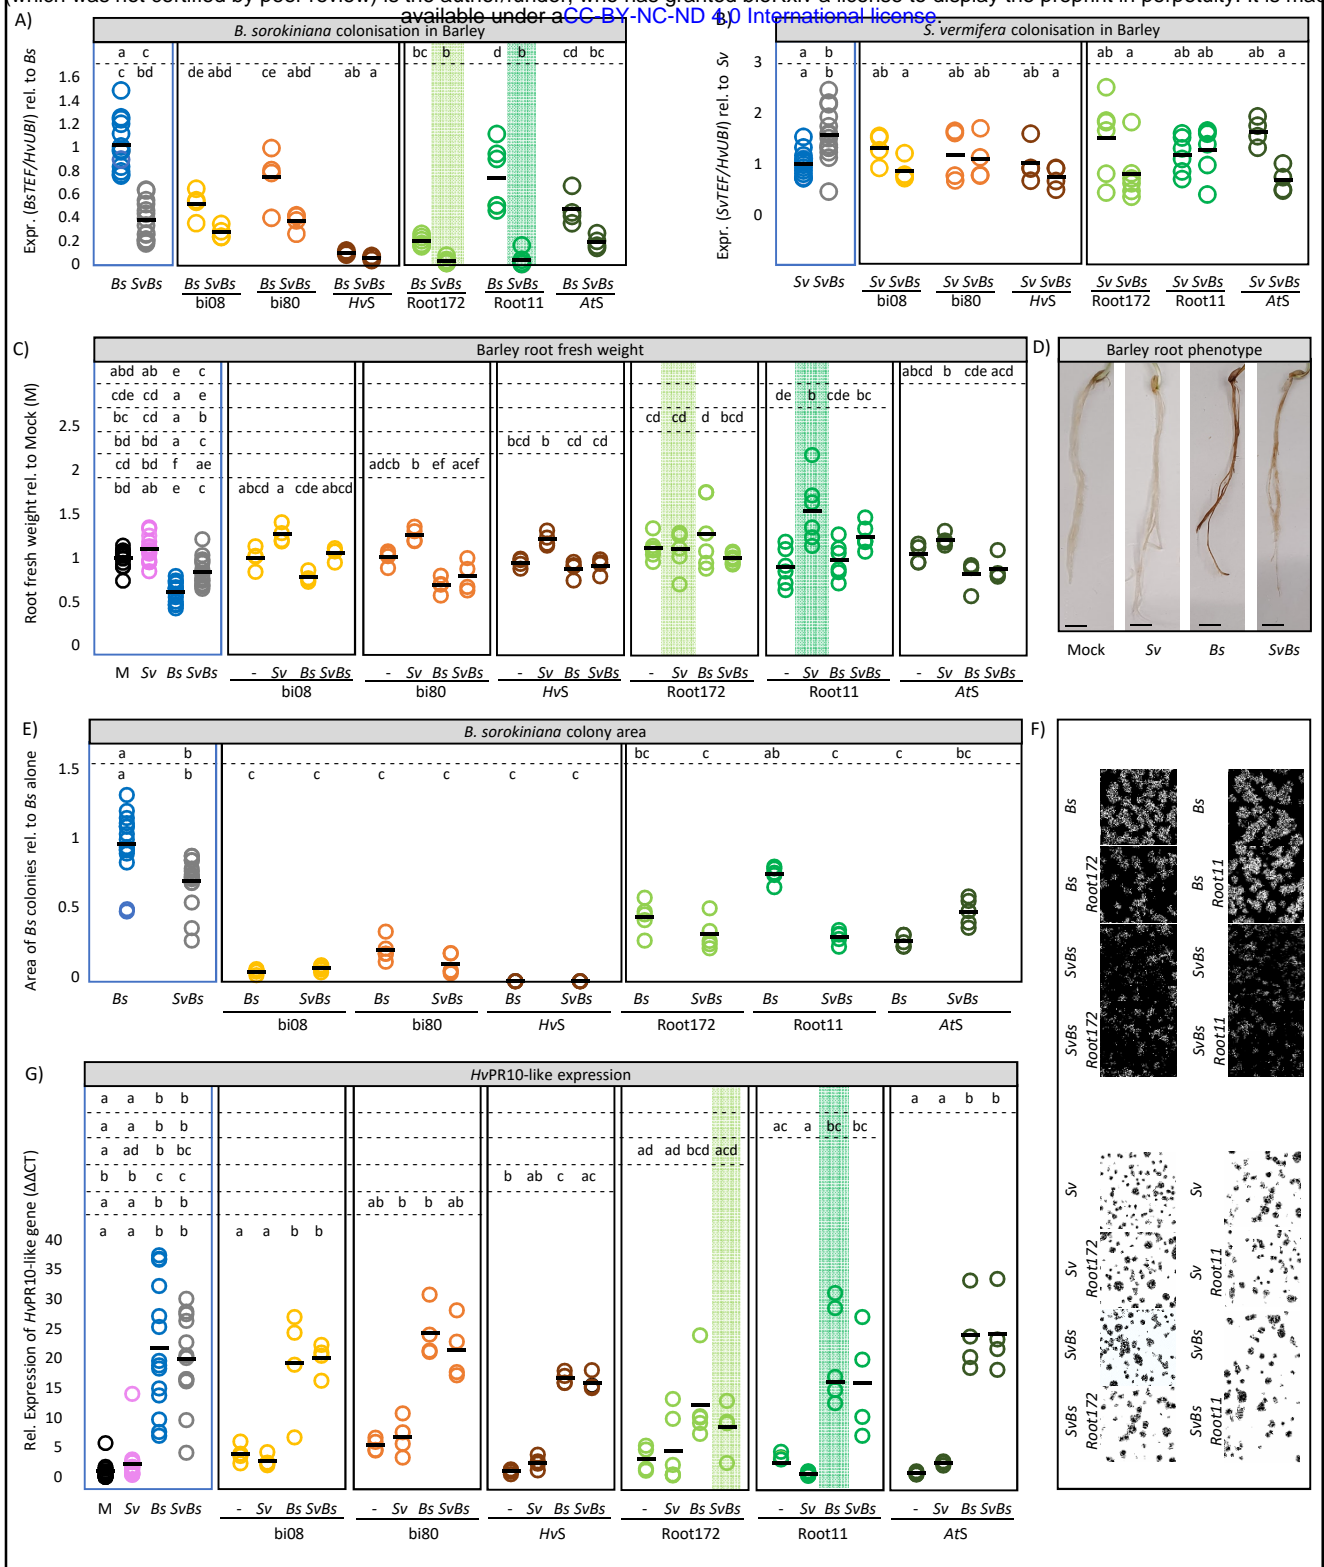

**Fig. 2**

**Fig. 2. Barley root colonisation and responses after fungal and/or bacterial inoculation at 6 dpi.** A) *Bs* and B) *Sv* colonisation in barley at 6 d post inoculation. Fungal colonisation in each biological replicate was confirmed by quantitative RT-PCR inferred by expression analysis of the fungal housekeeping gene *TEF* compared with barley ubiquitin (*UBI*) gene ( $n = 4-14$ ). C) Barley root fresh weight per biological replicate normalised to water (Mock) inoculated plants ( $n = 4-14$  with 4 plants each). D) Pictures showing barley roots inoculated with water as a control (Mock), *Sv*, *Bs* or both fungi, scale bar = 1 cm). E) *Bs* colony area in direct confrontation with *Sv* or bacteria in absence of the host on defined medium relative to *Bs* alone. F) Pictures of direct confrontation assays. *Bs* colonies (black background) and *Sv* colonies (white background) were filtered using ImageJ and the morphoLipJ plugin. *Sv* colony area was not negatively affected by the presence of the other microbes (data not shown). G) Relative expression of HvPr10-like gene (HORVU0Hr1G011720). Green background highlights samples that were later used for RNAseq. Different letters in the comparison between the tripartite panel (blue square) and combinations of any other panel (defined by the dashed lines) represent statistically significant differences according to one-way ANOVA and Tukey's post-hoc test ( $p < 0.05$ ).

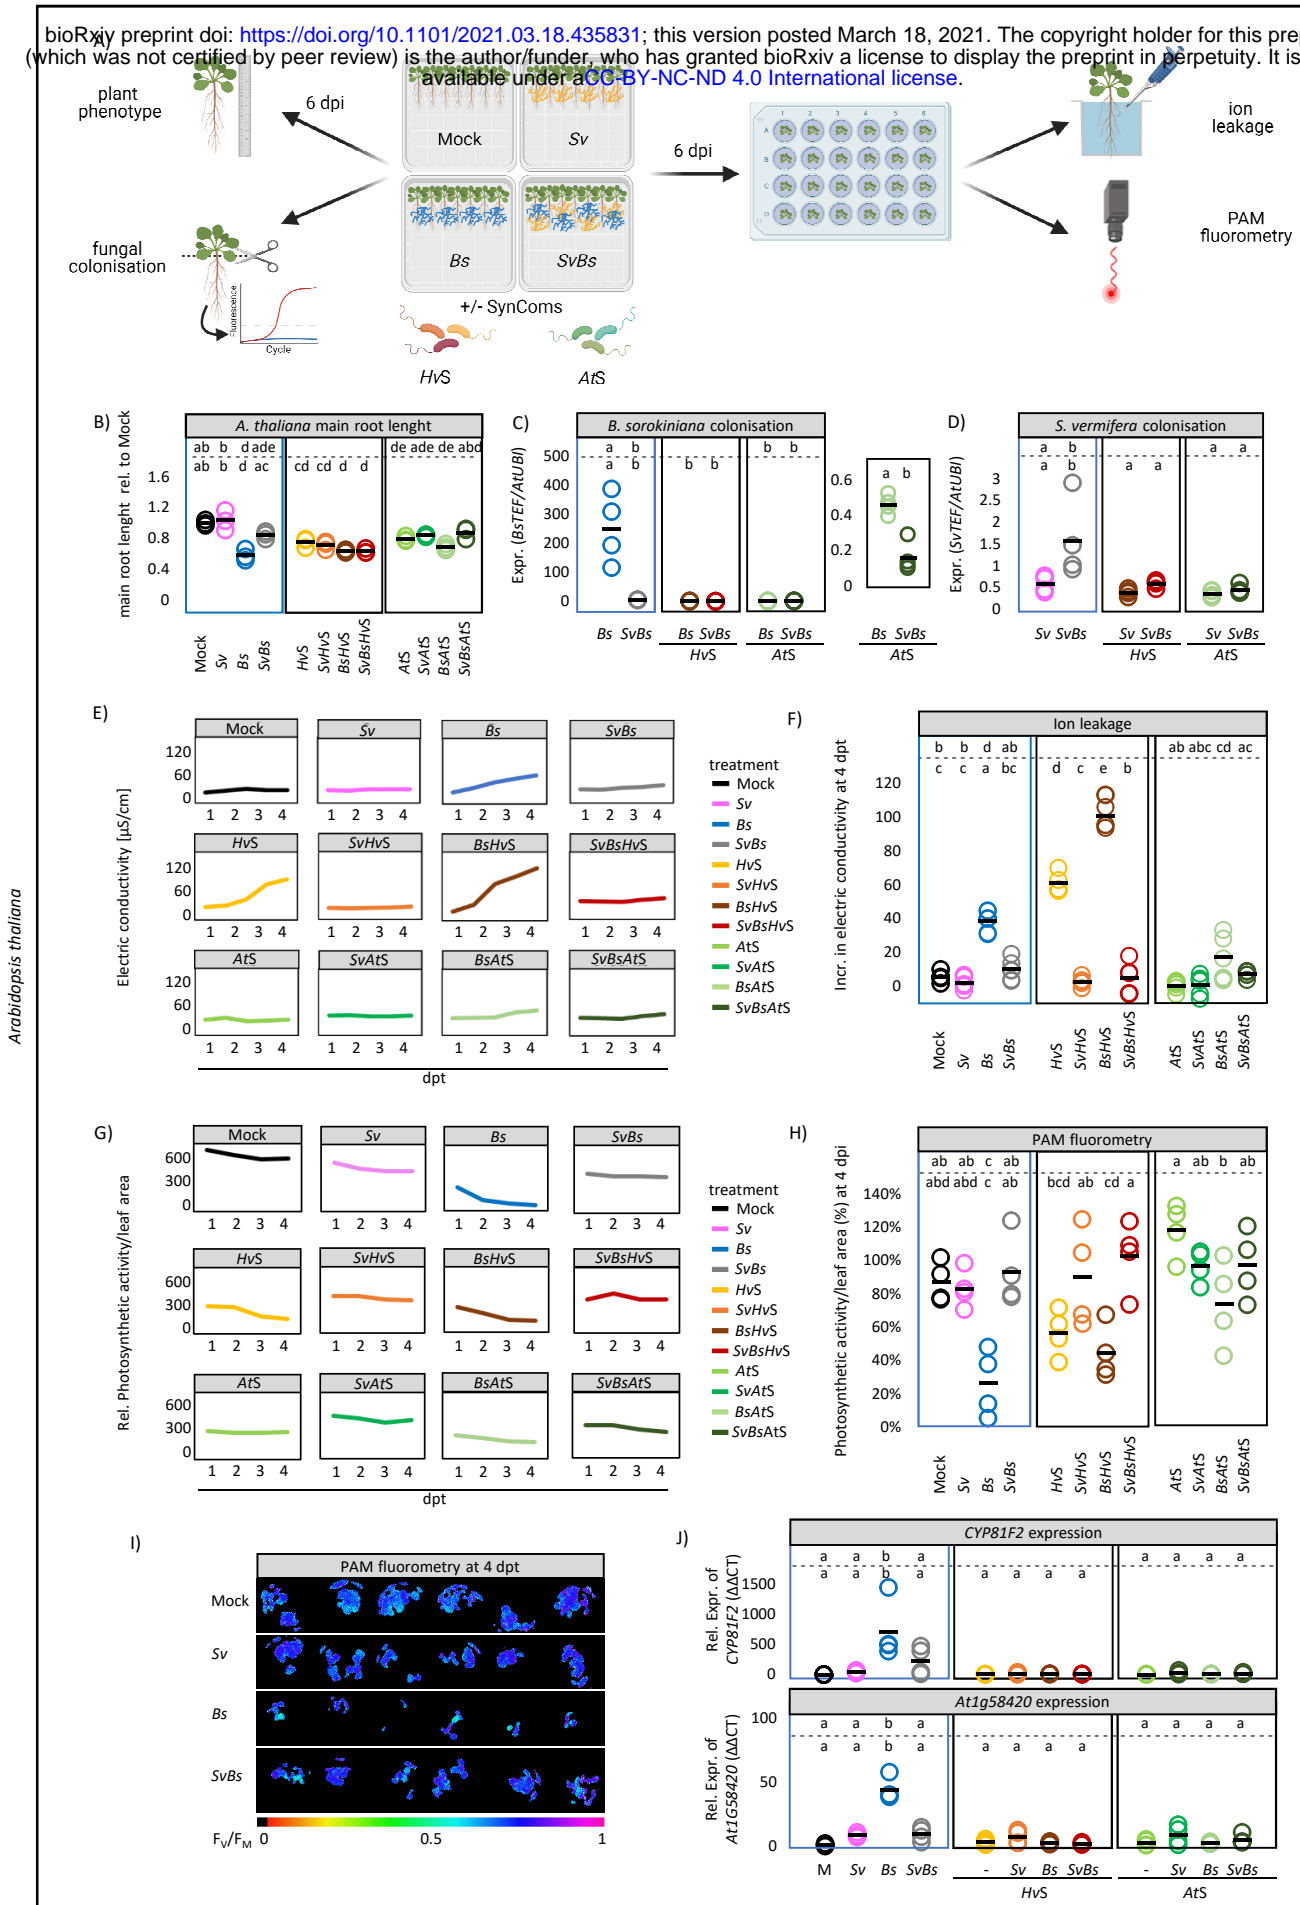

Fig. 3

bioRxiv preprint doi: <https://doi.org/10.1101/2021.03.18.435831>; this version posted March 18, 2021. The copyright holder for this preprint (which was not certified by peer review) is the author/funder, who has granted bioRxiv a license to display the preprint in perpetuity. It is made available under aCC-BY-NC-ND 4.0 International license.

**Fig. 3. Arabidopsis root colonisation and responses after fungal and/or bacterial inoculation at 6 dpi.** A) schematic drawing of the experimental setup measuring the electric conductivity (ion leakage) and photosynthetic activity (PAM fluorometry) in Arabidopsis seedlings. B) the main root length of *A. thaliana* inoculated in dipartite, tripartite and multipartite systems with *B. sorokiniana* (*Bs*), *S. vermifera* (*Sv*) and the bacterial synthetic communities *Hv* SynCom (*HvS*) or *At* SynCom (*AtS*). C) *Bs* and D) *Sv* colonisation in *A. thaliana* at 6 d post inoculation inferred by expression analysis of the fungal housekeeping gene TEF compared with Arabidopsis ubiquitin (UBI) (n = 4). To further assess *Bs* disease symptoms and plant health we measured E) the electric conductivity from 1 – 4 d post transfer (n = 6); F) the total increase in electric conductivity from 1 – 4 d post transfer (n = 6); G) the photosynthetic activity ( $F_V/F_M$ ) from 1 – 4 d post transfer (n = 6); and H) the photosynthetic activity per leaf area at 4 dpi relative to 1 dpi (n = 6). I) The photosystem II (PSII) quantum yield of 5 *At* seedlings/well at 4 dpi after dark adaptation ( $F_V/F_M$ ) via PAM fluorometry. Purple/dark blue, lighter colors and black color indicate high, reduced and lack of PS II activity respectively. *Bs* infection continuously reduces local PS II activity and spreads across the whole seedling, leading to a reduced photosynthetic active leaf area over time. J) The expression of the fungal responsive gene At1g58420 and the gene encoding for the cytochrome P450 monooxygenase CYP81F2 involved in indole glucosinolate biosynthesis and defense. Statistical analyses were performed for each subpanel together with the tripartite panel (in blue). Different letters in the comparison between the tripartite panel (blue square) and combinations of any other panel (defined by the dashed lines) represent statistically significant differences according to one-way ANOVA and Tukey's post-hoc test ( $p < 0.05$ ).

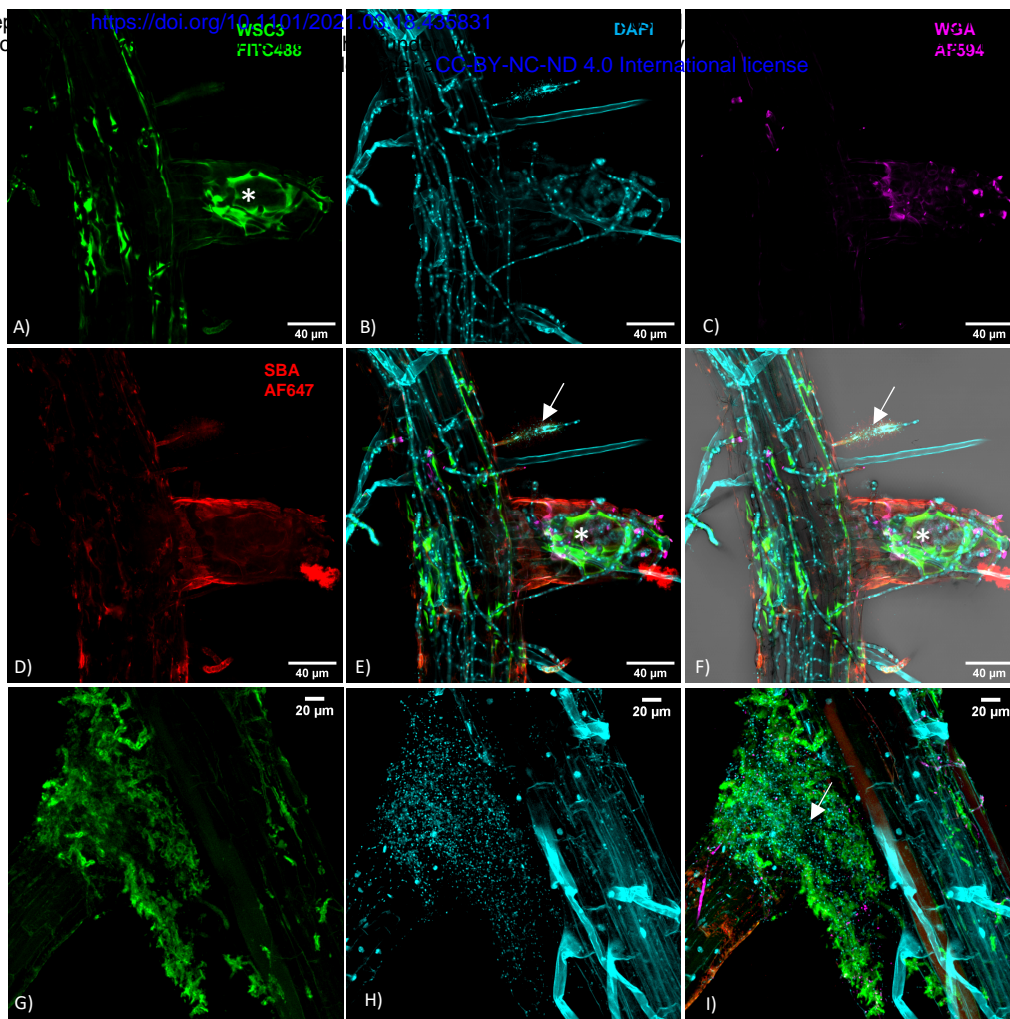

**Fig. 4:** *Arabidopsis thaliana* Col-0 inoculated with *Bs*+Root172 at 7 dpi. Roots were fixed with 70% EtOH and stained with the  $\beta$ -1,3-glucan binding lectin WSC3-FITC488 which binds to the fungal matrix (in A and G), the fluorescent DNA stain DAPI (in B and H), the chitin stain WGA-AF594 (in C) and the lectin SBA AF647, which binds  $\alpha$ - and  $\beta$ -N-acetylgalactosamine and galactopyranosyl residues (in D). Overlay in E, F and I. White arrows: *Bs* hyphae after loss of matrix in the presence of Root172. Asterisks: intact fungal matrix.

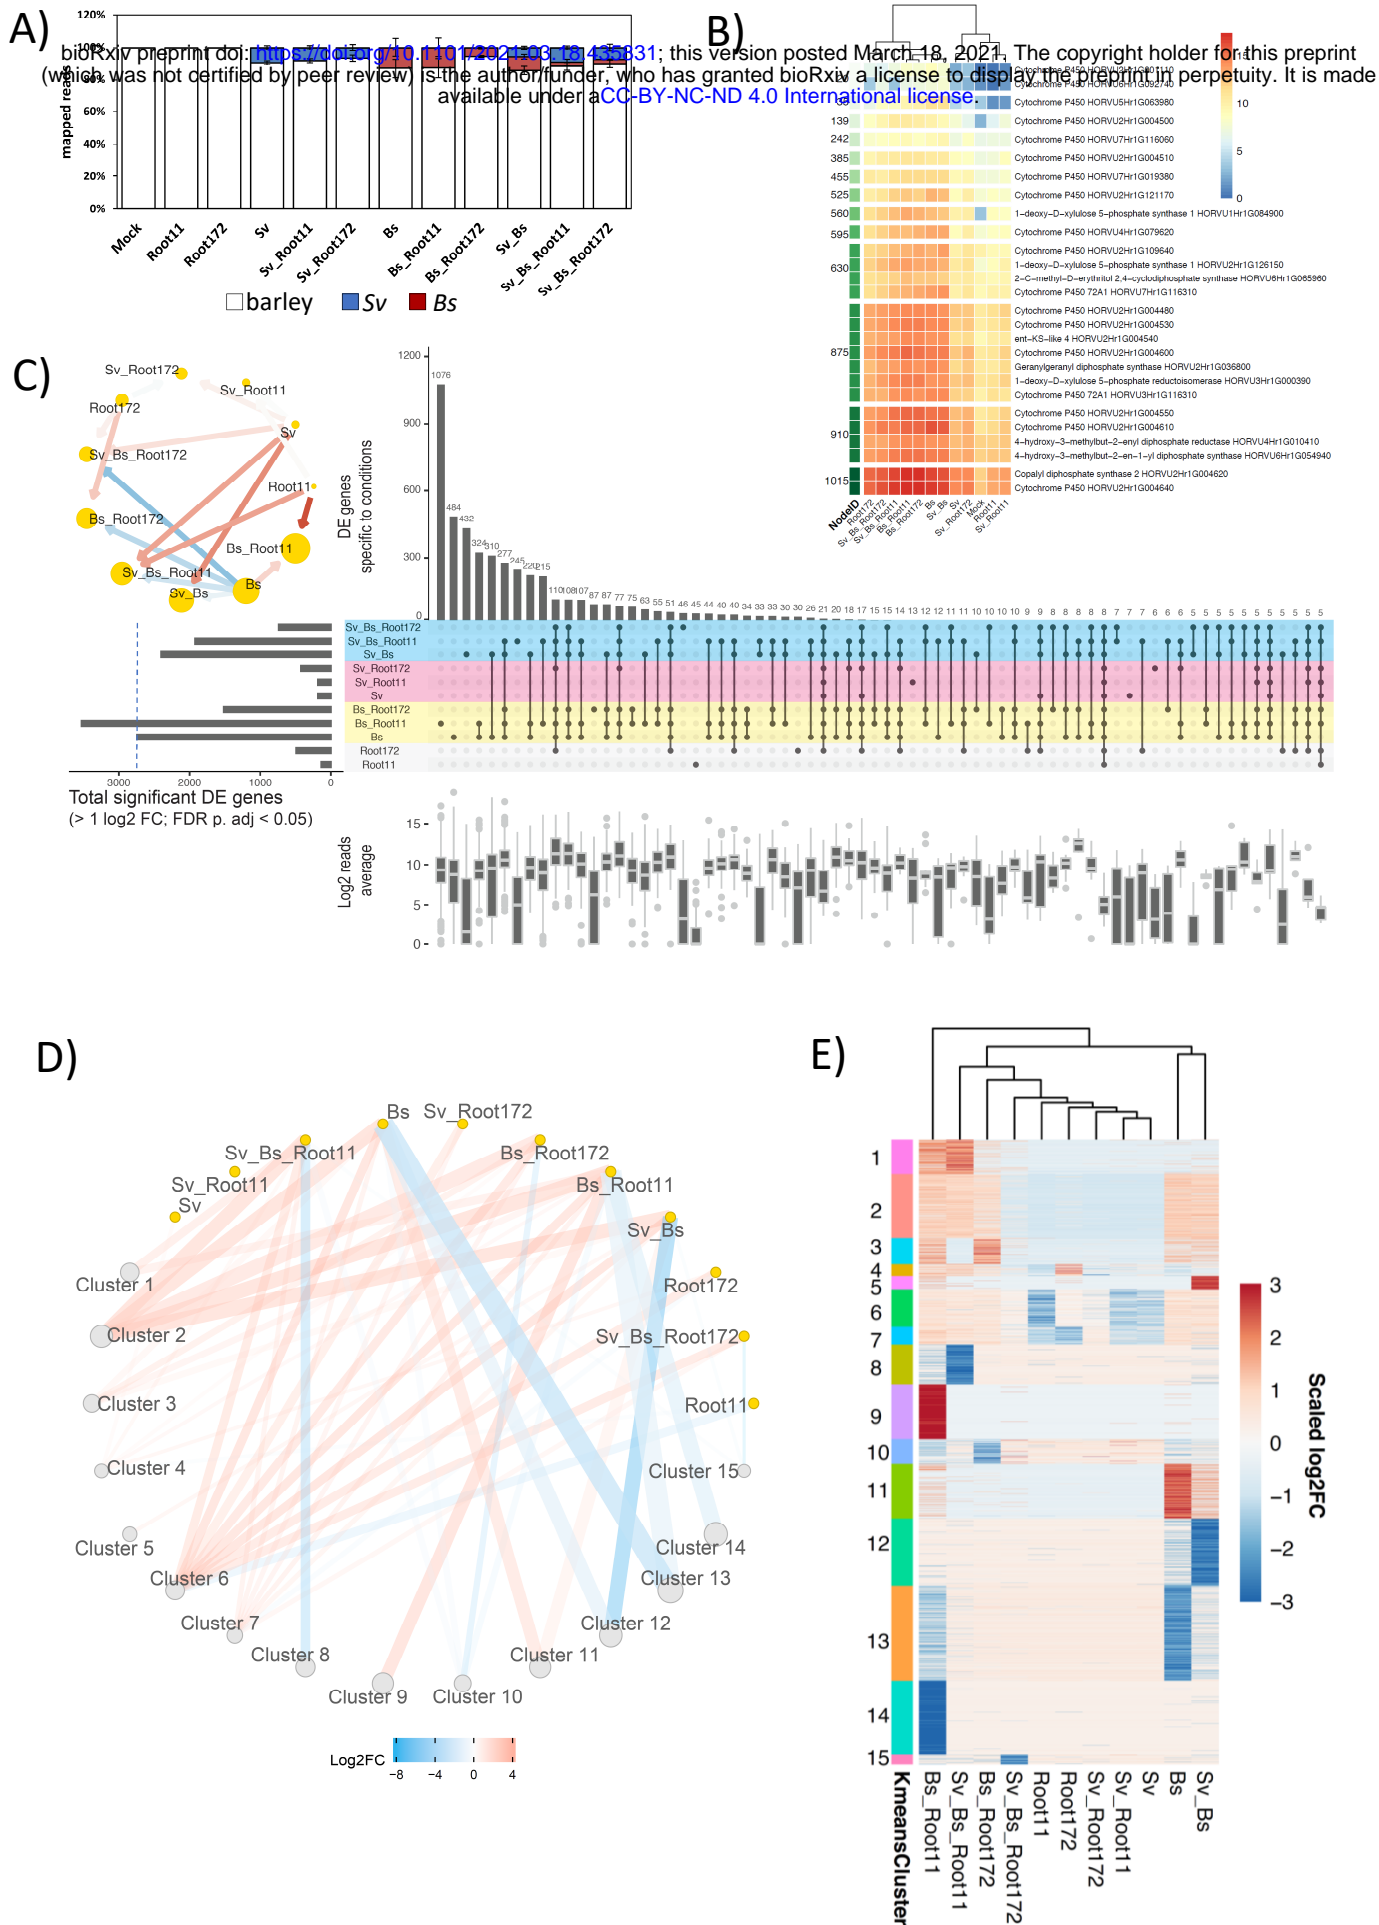

**Fig. 5**

**Fig. 5: Analysis of barley root transcriptional responses to fungal and bacterial inoculation at 6 dpi.** BS: *Bipolaris sorokiniana*, Sv: *Serenicarpita vermifera*. Root11 & Root172: *A. thaliana* root-associated bacterial strains Root11 & Root172. A) Proportion of reads mapped to the organisms per sample. A total of 34 RNA-seq samples were mapped to the corresponding organisms. Mock: *Hordeum vulgare*. See Table S2. B) Transcription level of genes putatively involved in terpenoid phytoalexin synthesis. Averaged transcription in log<sub>2</sub> is shown per condition. Terpenoid phytoalexin synthesis pathway in barley was published earlier (Sarkar et al., 2019). See Tab. S6. C) Condition-specific differentially expressed genes (> 1 log<sub>2</sub>FC; FDR adjusted p-value < 0.05) are compared to barley Mock control. Horizontal bars: Total number of DE genes per condition, additionally visualised as a network. Red and blue arrows represent a normalised high and low number of DEGs among the conditions compared. The size of the circles corresponds to the total number of DEGs. Vertical bars: Number of genes unique/shared for top 70 intersections. See Table S7. D) K-means clustering of differentially expressed genes grouped into 15 clusters visualised as a network. Node size and line thickness correspond to the number of DEGs. Colours of lines connecting clusters and conditions represent log<sub>2</sub> fold changes and up/down regulations. E) K-means clustering of above is presented as a heatmap. A total of 14,274 differentially expressed genes are used for C, D, and E. See Tab. S7 and Tab. S8.



A)

bioRxiv preprint doi: <https://doi.org/10.1101/2021.03.18.455831>; this version posted March 18, 2021. The copyright holder for this preprint (which was not certified by peer review) is the author/funder, who has granted bioRxiv a license to display the preprint in perpetuity. It is made available under aCC-BY-NC-ND 4.0 International license.

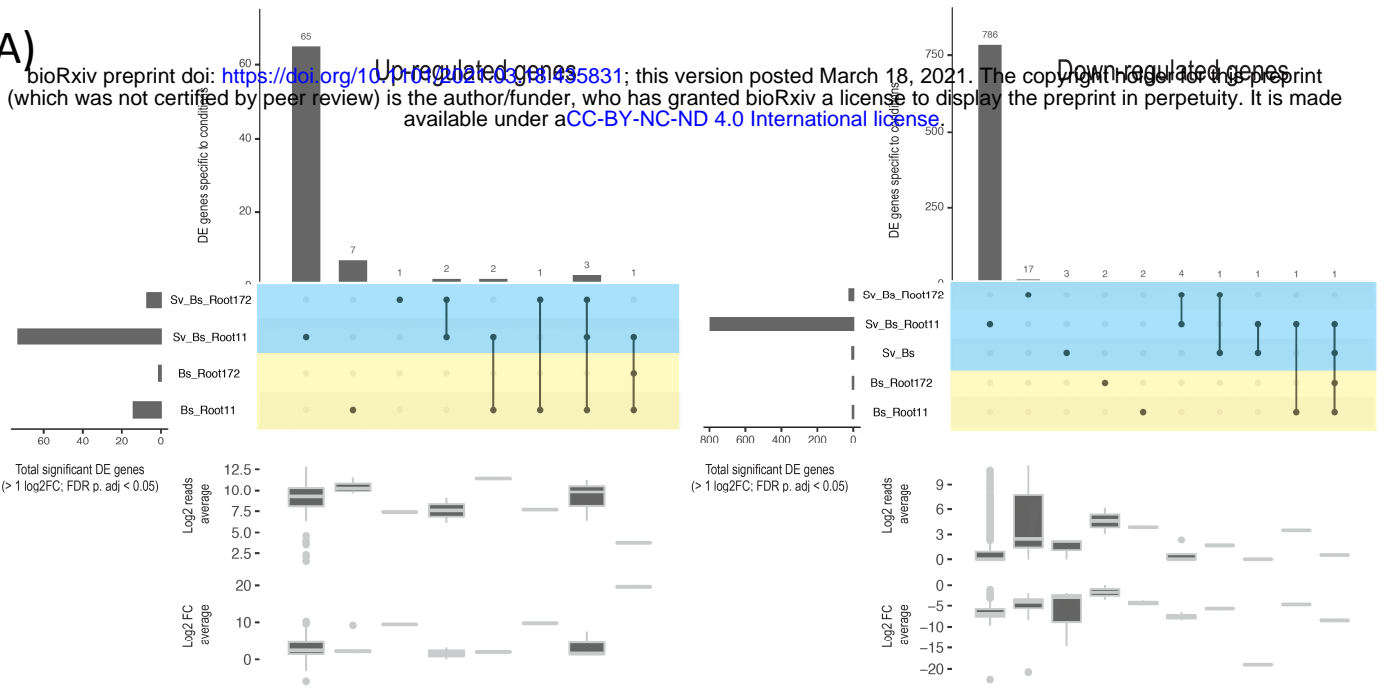

B)

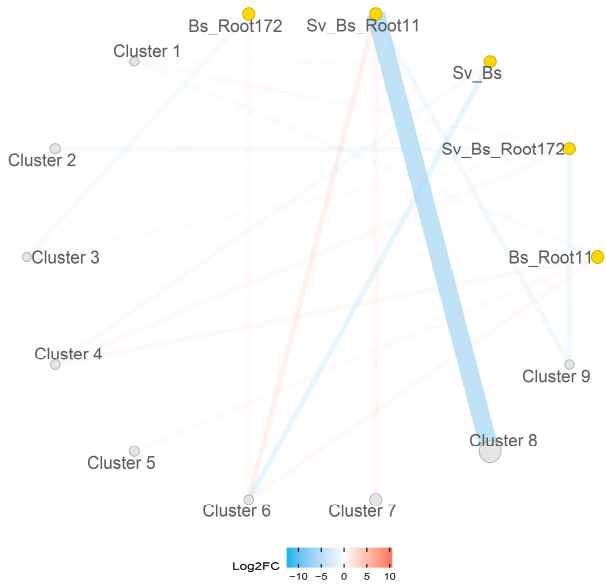

C)

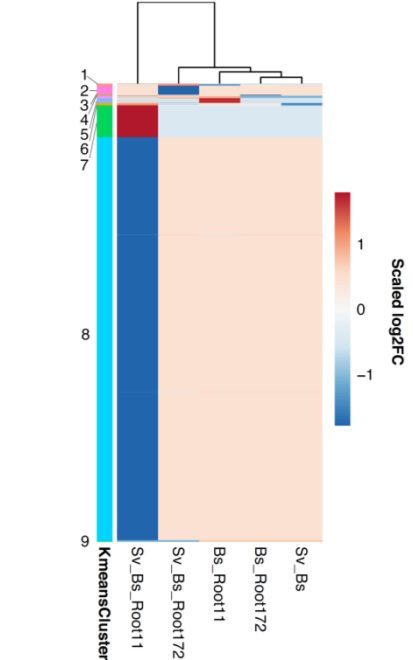

D)

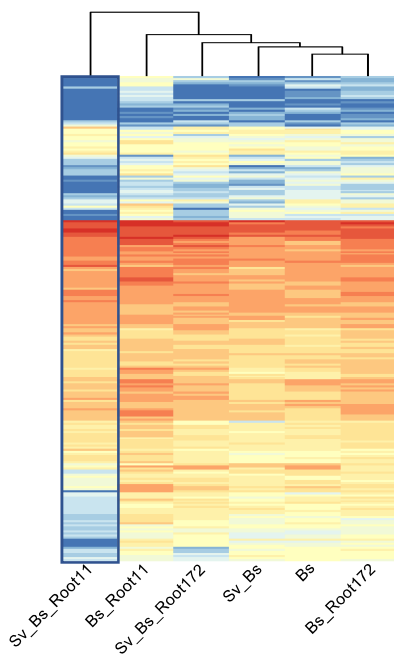

E)

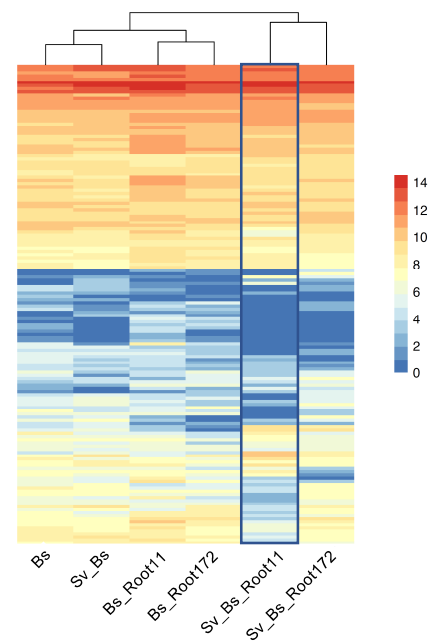

Fig. 6

**Fig 6. *B. sorokiniana* transcriptional responses to *S. vermifera* and bacteria at 6 dpi during colonisation of barley host plants. Bs: *Bipolaris sorokiniana*. Sv: *Serendipita vermifera*. Root11 & Root172: *A. thaliana* root-associated bacterial strains Root11 & Root172.** A) Condition-specific differentially expressed *B. sorokiniana* genes ( $> 1$  log<sub>2</sub>FC; FDR adjusted p-value  $< 0.05$ ) compared to barley infection alone. Horizontal bars: Total number of DEGs per condition. Vertical bars: Number of genes unique/shared for intersections. See Tab S7. B) K-means clustering of differentially expressed genes grouped into 9 clusters visualised as a network. Node size and line thickness correspond to the number of DEGs. Colours of lines connecting clusters and conditions represent log<sub>2</sub> fold changes and up/down regulations. C) K-means clustering of the 9 groups is displayed as a heatmap. A total of 923 differentially expressed genes are used for B and C. See Tab. S8. D) Averaged log<sub>2</sub> read counts of predicted secreted CAZyme coding genes. E) Averaged log<sub>2</sub> read count of effector coding genes. See Tab. S9.

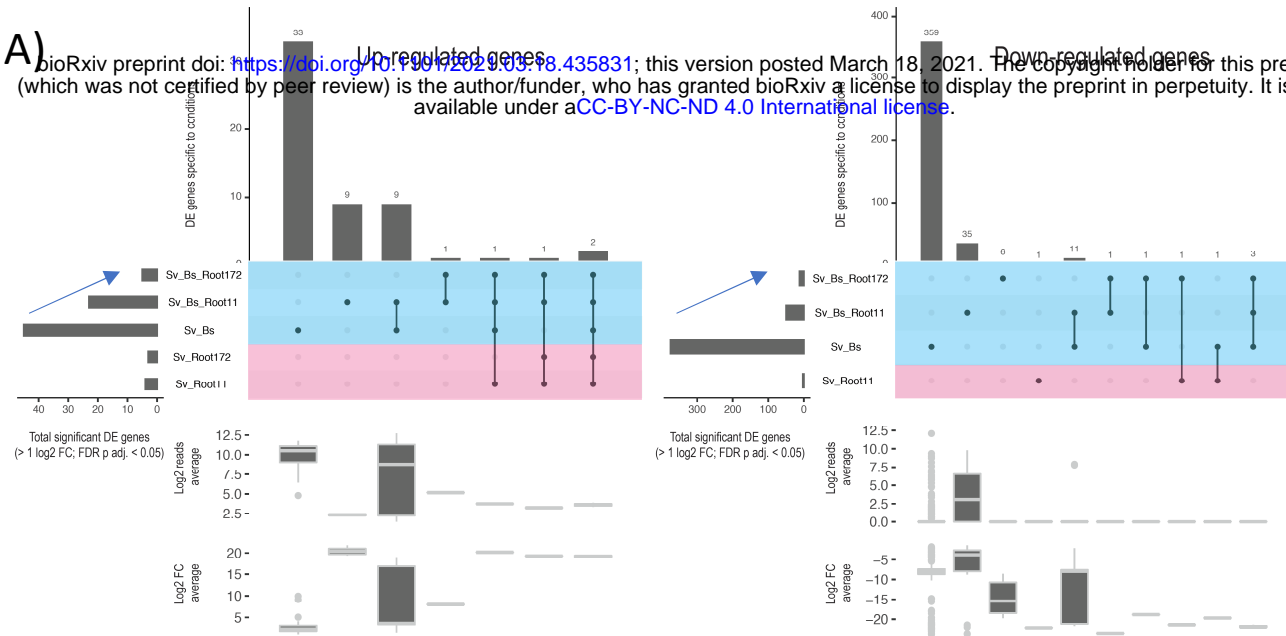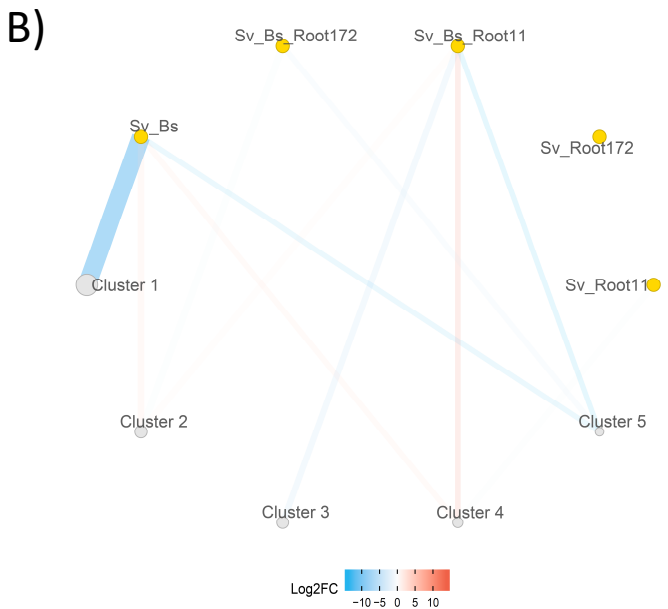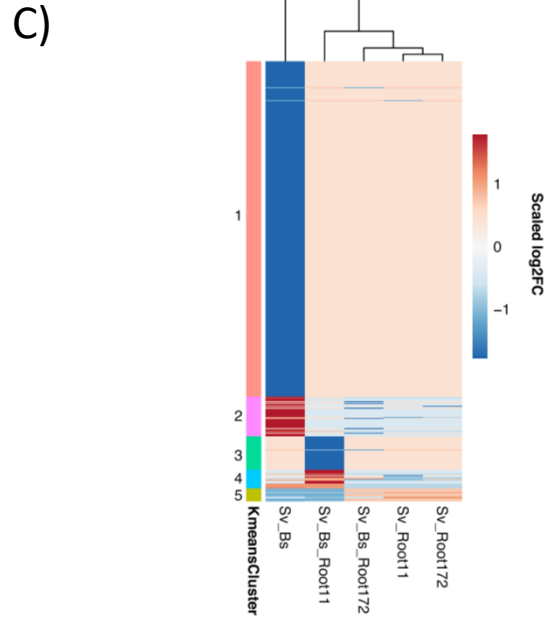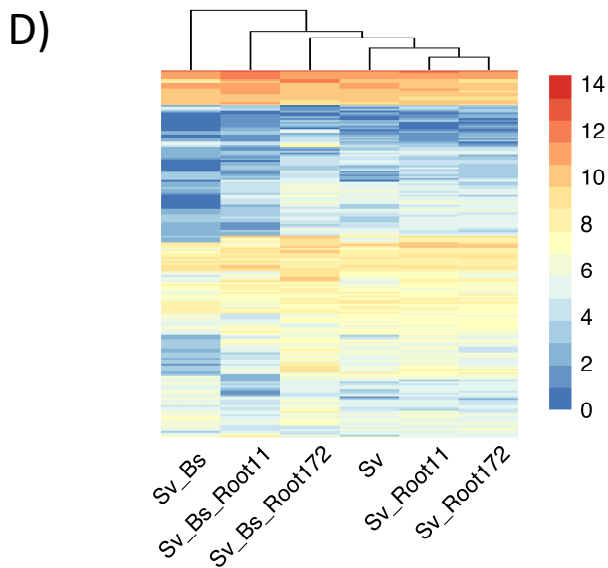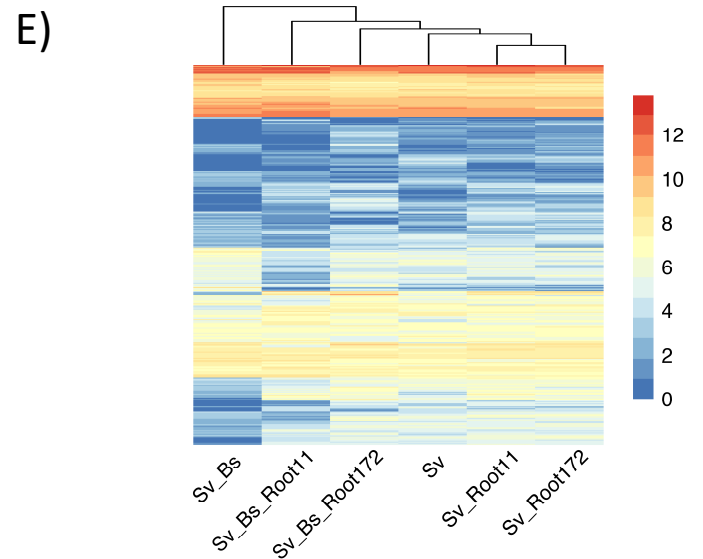

Fig. 7

**Fig. 7. *S. vermifera* transcriptional responses to *B. sorokiniana* and bacteria at 6 dpi during colonisation of barley host plants. *Bs*: *Bipolaris sorokiniana*. *Sv*: *Serendipita vermifera*. Root11 & Root172: *A. thaliana* root-associated bacterial strains Root11 & Root172. A) Condition-specific of differentially expressed genes ( $> 1 \log_2FC$ ; FDR adjusted p-value  $< 0.05$ ) are identified by comparing to the control condition (i.e. fungus alone). Horizontal bars: Total number of DEGs per condition. Vertical bars: Number of genes unique/shared for intersections. See Tab. S7. B) K-means clustering of differentially expressed genes forming 5 clusters is displayed as a network. Node size and line thickness correspond to the number of DE genes. Colours of lines connecting clusters and conditions represent  $\log_2$  fold changes and up/down regulations. C) K-means clustering above is given as a heatmap. A total of 520 differentially expressed genes are used for B and C. See Tab. S8. D) Averaged  $\log_2$  read count of predicted secreted CAZyme coding genes. E) Averaged  $\log_2$  read count of effector coding genes. See Tab. S9.**

# Supplementary Figures

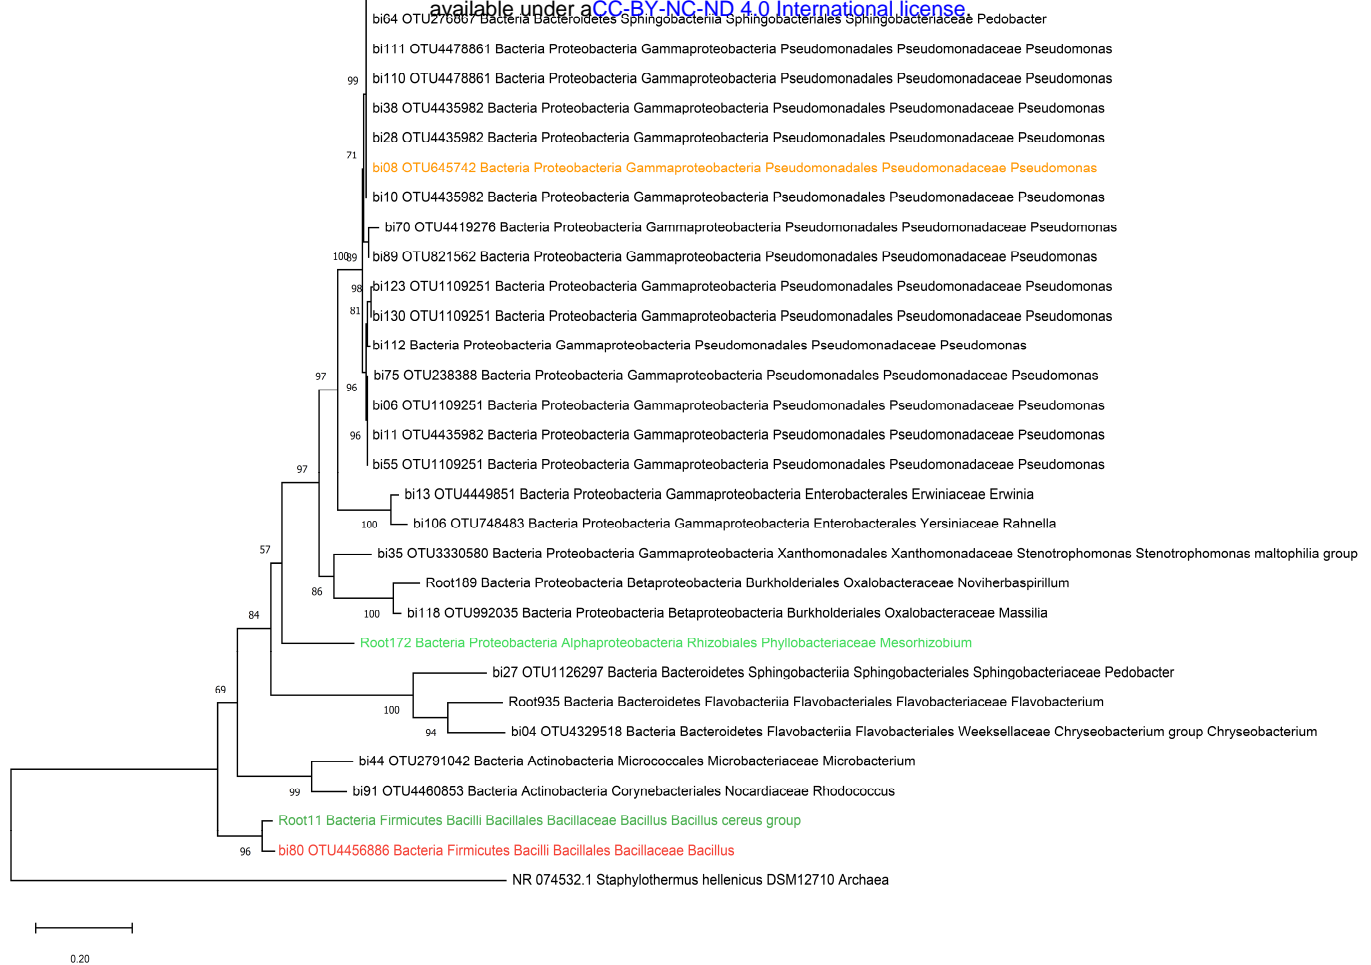

**Fig. S1: Phylogenetic tree of Arabidopsis and barley associated bacteria.** The evolutionary history was inferred from 16S rRNA genes (Bai et al., 2015) by using the Maximum Likelihood method and Tamura-Nei model (Tamura et al., 1993). The percentage of trees in which the associated taxa clustered together is shown next to the branches. The tree is drawn to scale, with branch lengths measured in the number of substitutions per site. Evolutionary analyses were conducted in MEGA X (Kumar et al., 2018). Taxonomy of strains was inferred by blast searches against NCBI rRNA/ITS databases.

## References

- Bai, Y., Müller, D., Srinivas, G. et al. Functional overlap of the Arabidopsis leaf and root microbiota. *Nature* 528, 364–369 (2015). <https://doi.org/10.1038/nature16192> and Robertson-Albertyn S. et al., bioRxiv preprint doi: <https://doi.org/10.1101/2021.03.10.434690>
- Tamura K. and Nei M. (1993). Estimation of the number of nucleotide substitutions in the control region of mitochondrial DNA in humans and chimpanzees. *Molecular Biology and Evolution* 10:512-526.
- Kumar S., Stecher G., Li M., Knyaz C., and Tamura K. (2018). MEGA X: Molecular Evolutionary Genetics Analysis across computing platforms. *Molecular Biology and Evolution* 35:1547-1549.

Arabidopsis thaliana

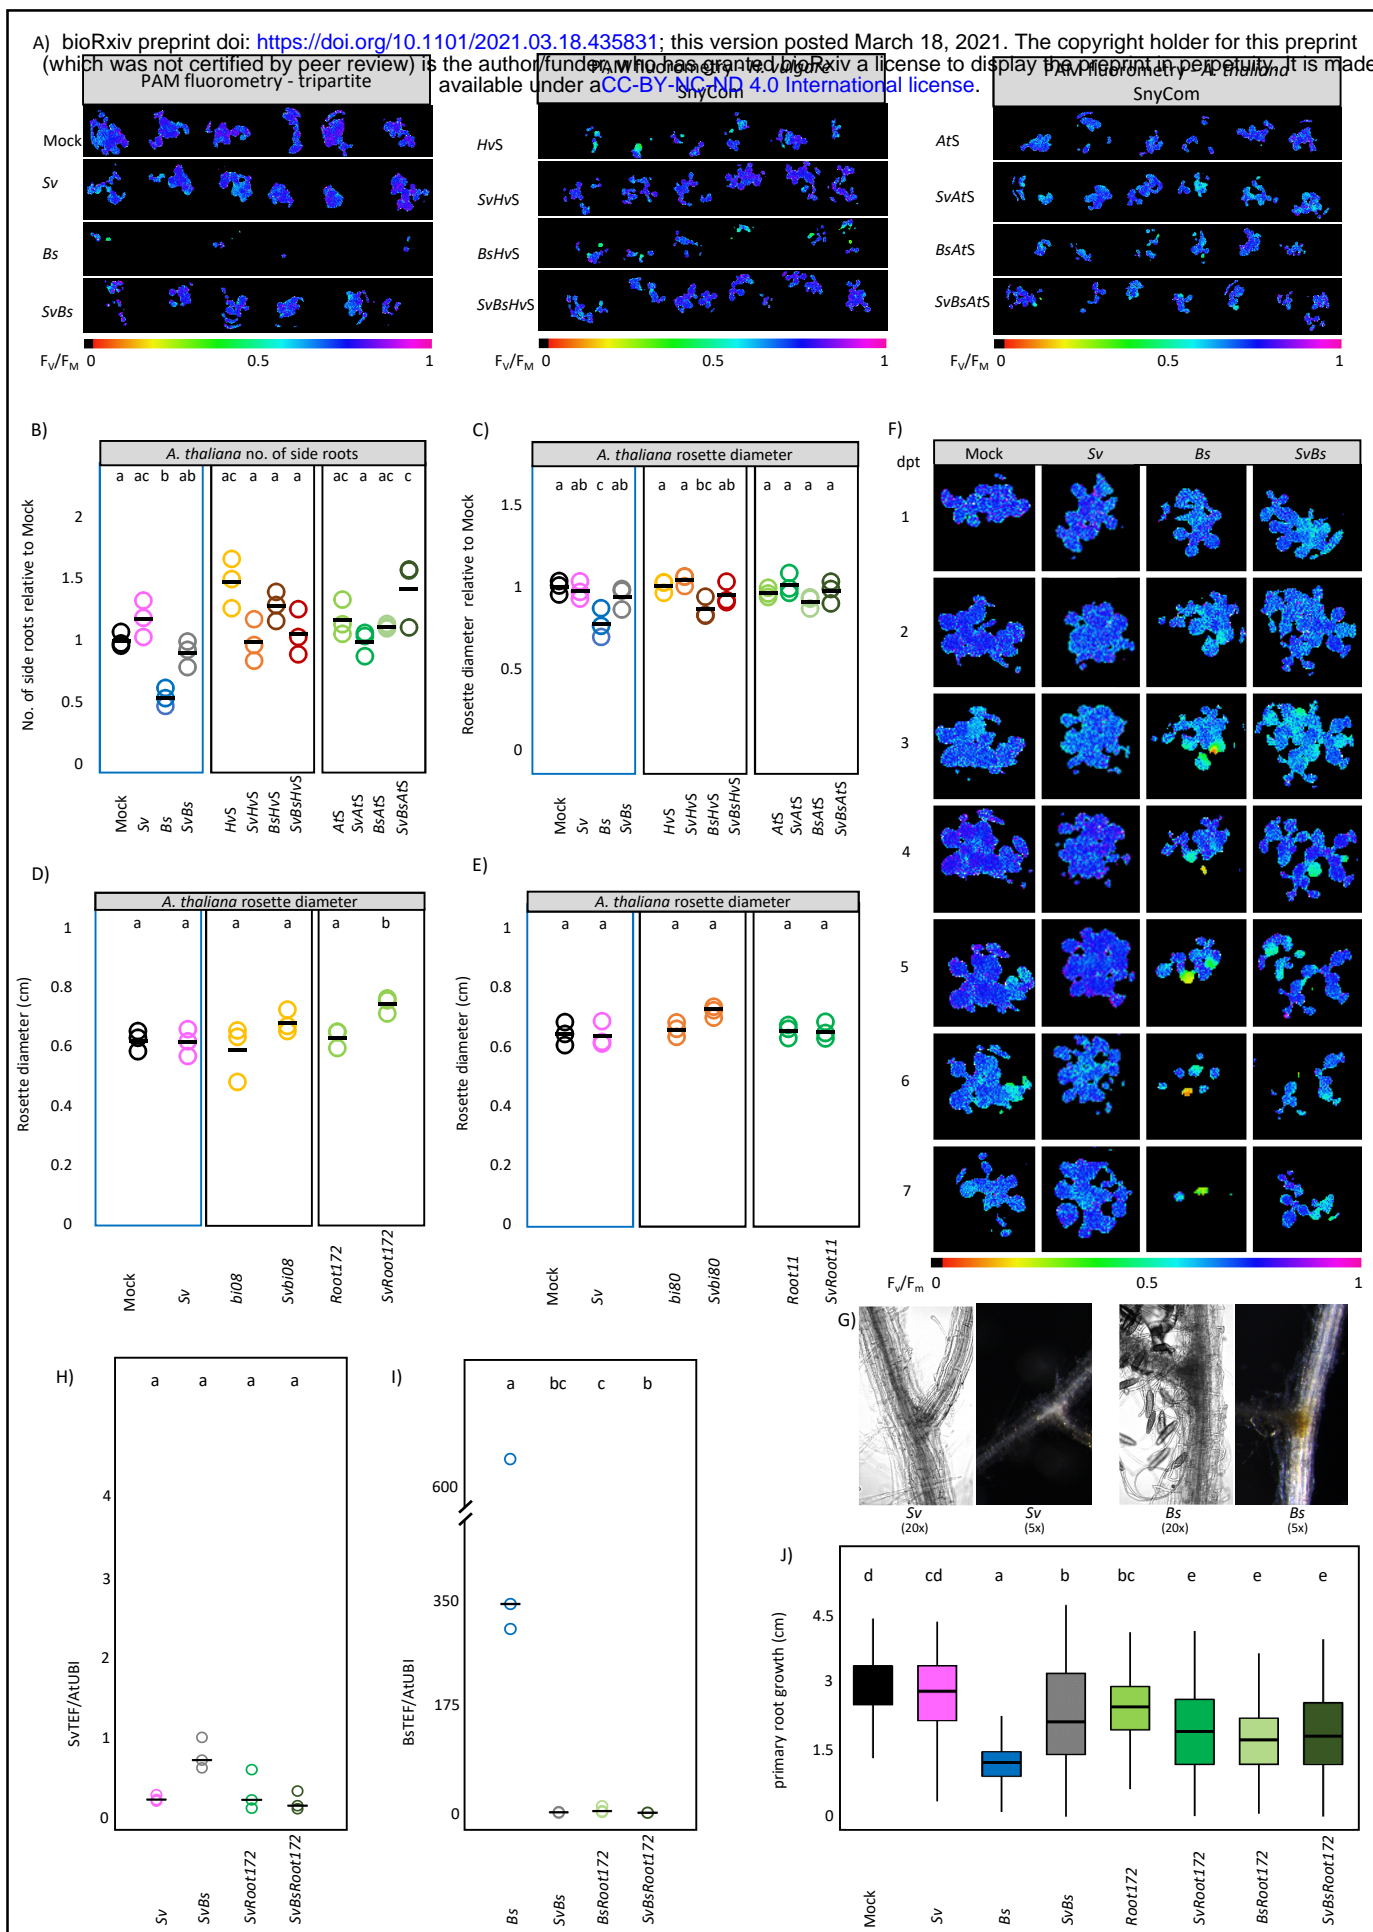

**Fig. S2**

**Fig. S2: Phenotypic analysis of Arabidopsis roots at 6 dpi with Sv and/or Bs with or without the bacterial SynComs HvS and AtS or single bacterial strains.** A) The photosystem II (PSII) quantum yield of 5 At seedlings/well in absence or presence of Sv, Bs and/or a bacterial SynCom (HvS or AtS) at 4 dpt after dark adaptation ( $F_v/F_m$ ) via PAM fluorometry. Purple/dark blue, lighter colors and black color indicate high, reduced and lack of PS II activity respectively. B) number of *A. thaliana* side roots relative to control plants (Mock) C-E) *A. thaliana* rosette diameter in presence or absence of Sv, Bs and the different bacterial strains/SynComs and C) the bacterial SynComs. D) the single Proteobacteria strains bi08 and Root172 E) the single Firmicutes strains bi80 and Root11. F) exemplary time course PAM fluorometry pictures from 1-7 d post transfer in the tripartite conditions G) Pictures of Sv and Bs inoculated Arabidopsis roots at 6 dpi in 5x and 20x magnification H) Bs and H) Sv colonisation in Arabidopsis inoculated with Sv, Bs or both fungi in the absence or presence of Root172 at 6 d post inoculation inferred by expression analysis of the fungal housekeeping gene TEF compared with Arabidopsis ubiquitin (UBI) (n = 3 with 60 plants per replicate). I) Root growth of Arabidopsis seedlings inoculated with Sv, Bs or Root172 in all combinations from 0 dpi – 6 dpi (cm). Different letters represent statistically significant differences according to one-way ANOVA and Tukey's post-hoc test (p < 0.05).



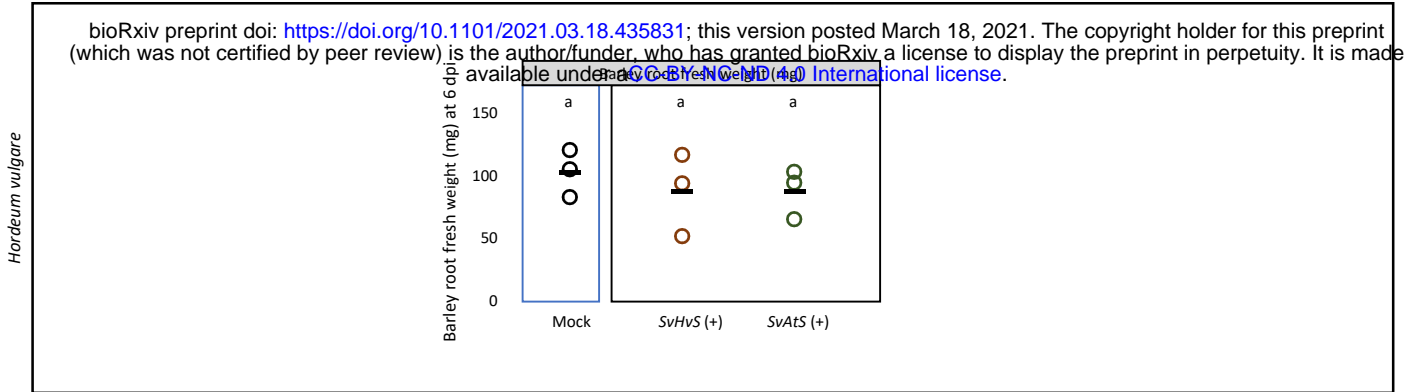

**Fig. S3: Root fresh weight (mg) of barley seedlings inoculated with *Sv* and the heat-inactivated bacterial SynComs (+).** Root weight was measured at 6 dpi. Different letters represent statistically significant differences according to one-way ANOVA and Turkey's post-hoc test ( $p < 0.05$ ).

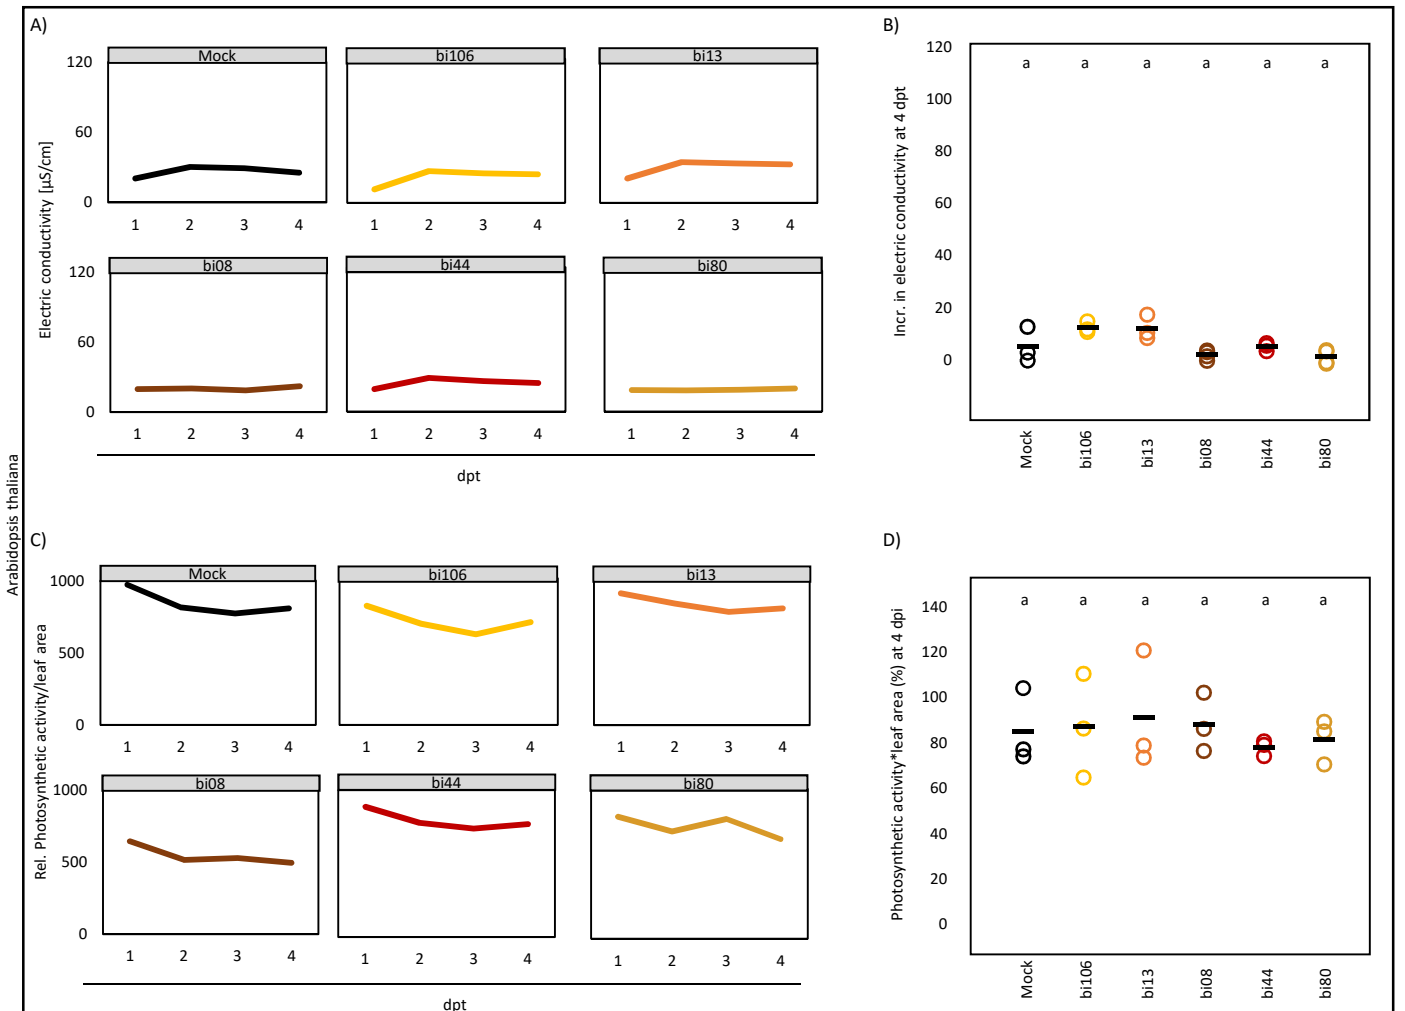

**Fig. S4: Arabidopsis root responses to bacterial inoculations at 6 dpi.** Arabidopsis seedlings were inoculated with individual strains bi106, bi13, bi08, bi44 and bi80, all derived from the *HvS*. A) Electric conductivity from 1 to 4 days post transfer ( $n = 6$ ). B) Total increase in electric conductivity from 1 to 4 days post transfer ( $n = 3$ ). C) Photosynthetic activity ( $F_V/F_M$ ) from 1 to 4 days post transfer ( $n = 3$ ). D) Photosynthetic activity per leaf area at 4 dpi relative to 1 dpi ( $n = 3$ ). Different letters represent statistically significant differences according to one-way ANOVA and Tukey's post-hoc test ( $p < 0.05$ ).

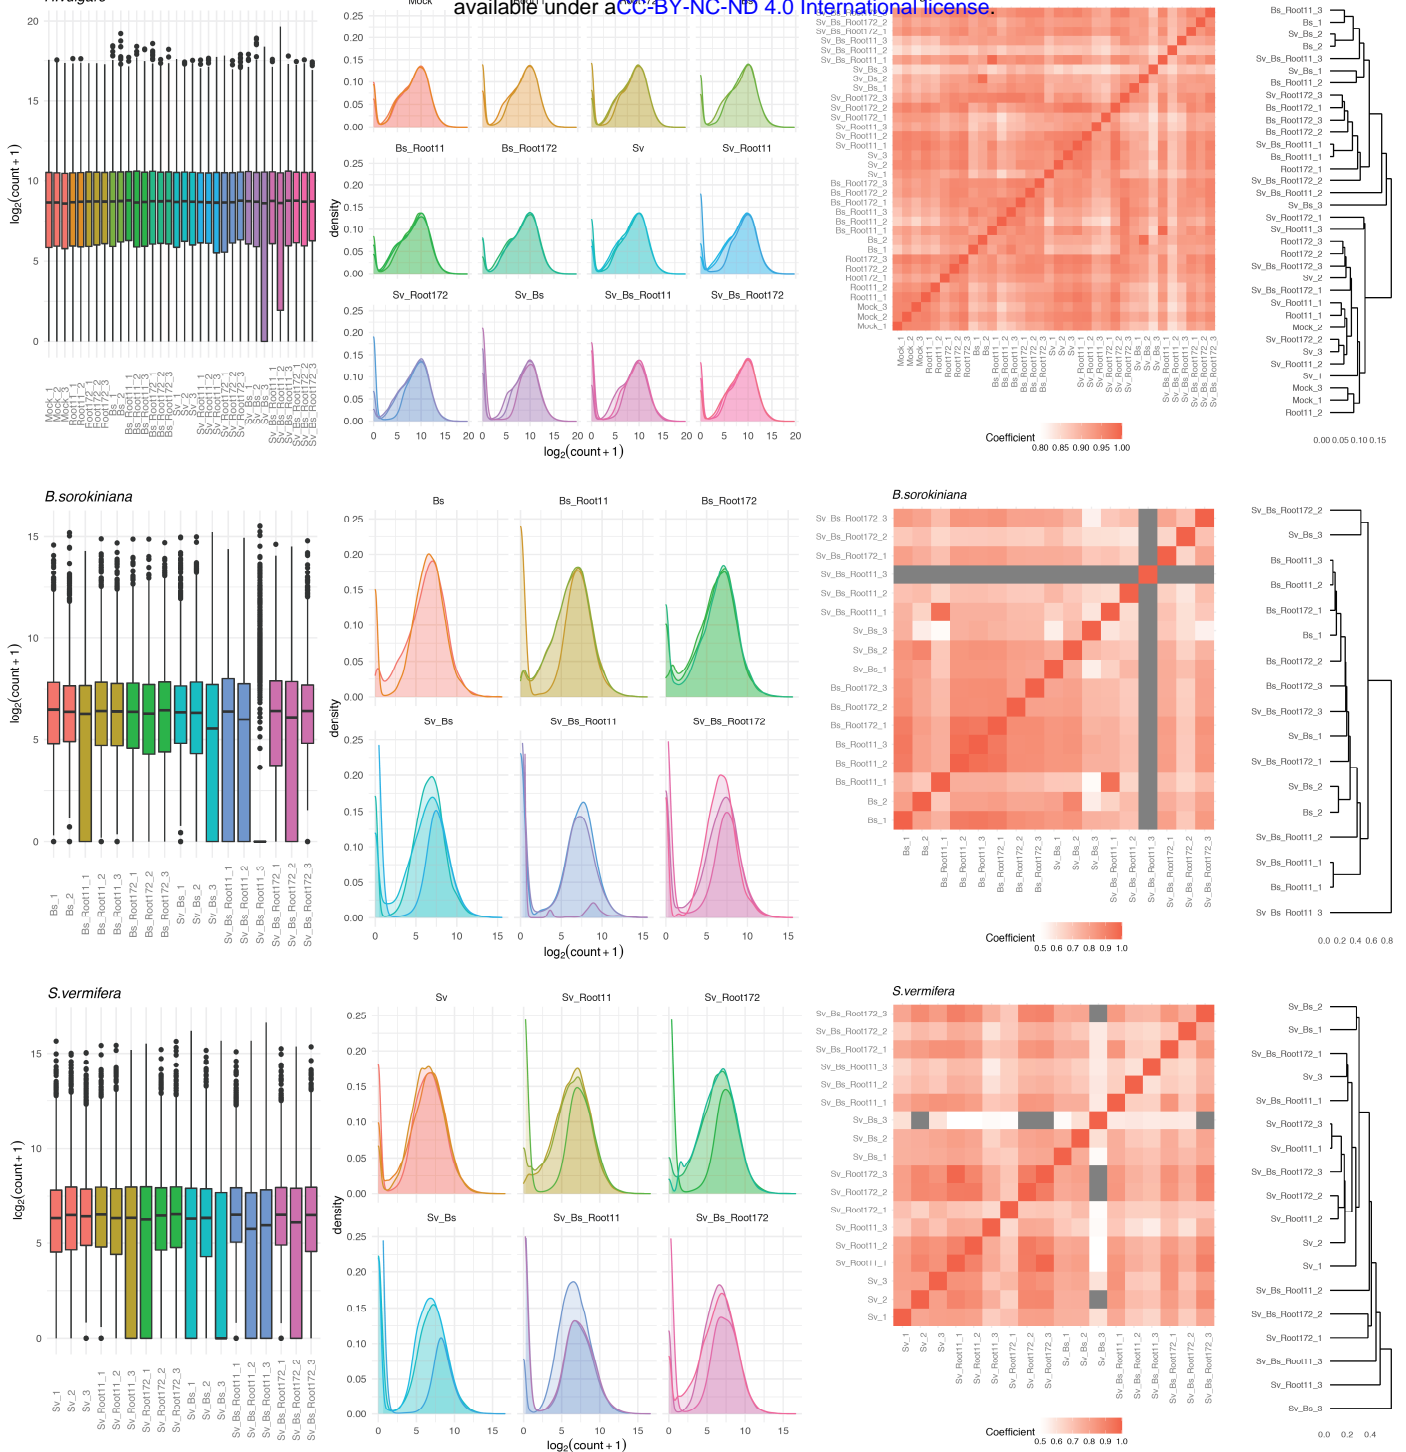

**Fig. S5: Assessment of RNA-seq data.** A) Distribution and density of the normalised log<sub>2</sub> transformed transcript count of genes for three organisms. B) Correlation of transcriptomes of RNA-seq samples. Left part: Adjacent matrix based on the of the correlation coefficients. Right part: Hierarchical clustering of biological replicates according to the distances of transcriptomic similarities. Grey represents correlation coefficients lower than 0.5.

## *Hordeum vulgare*

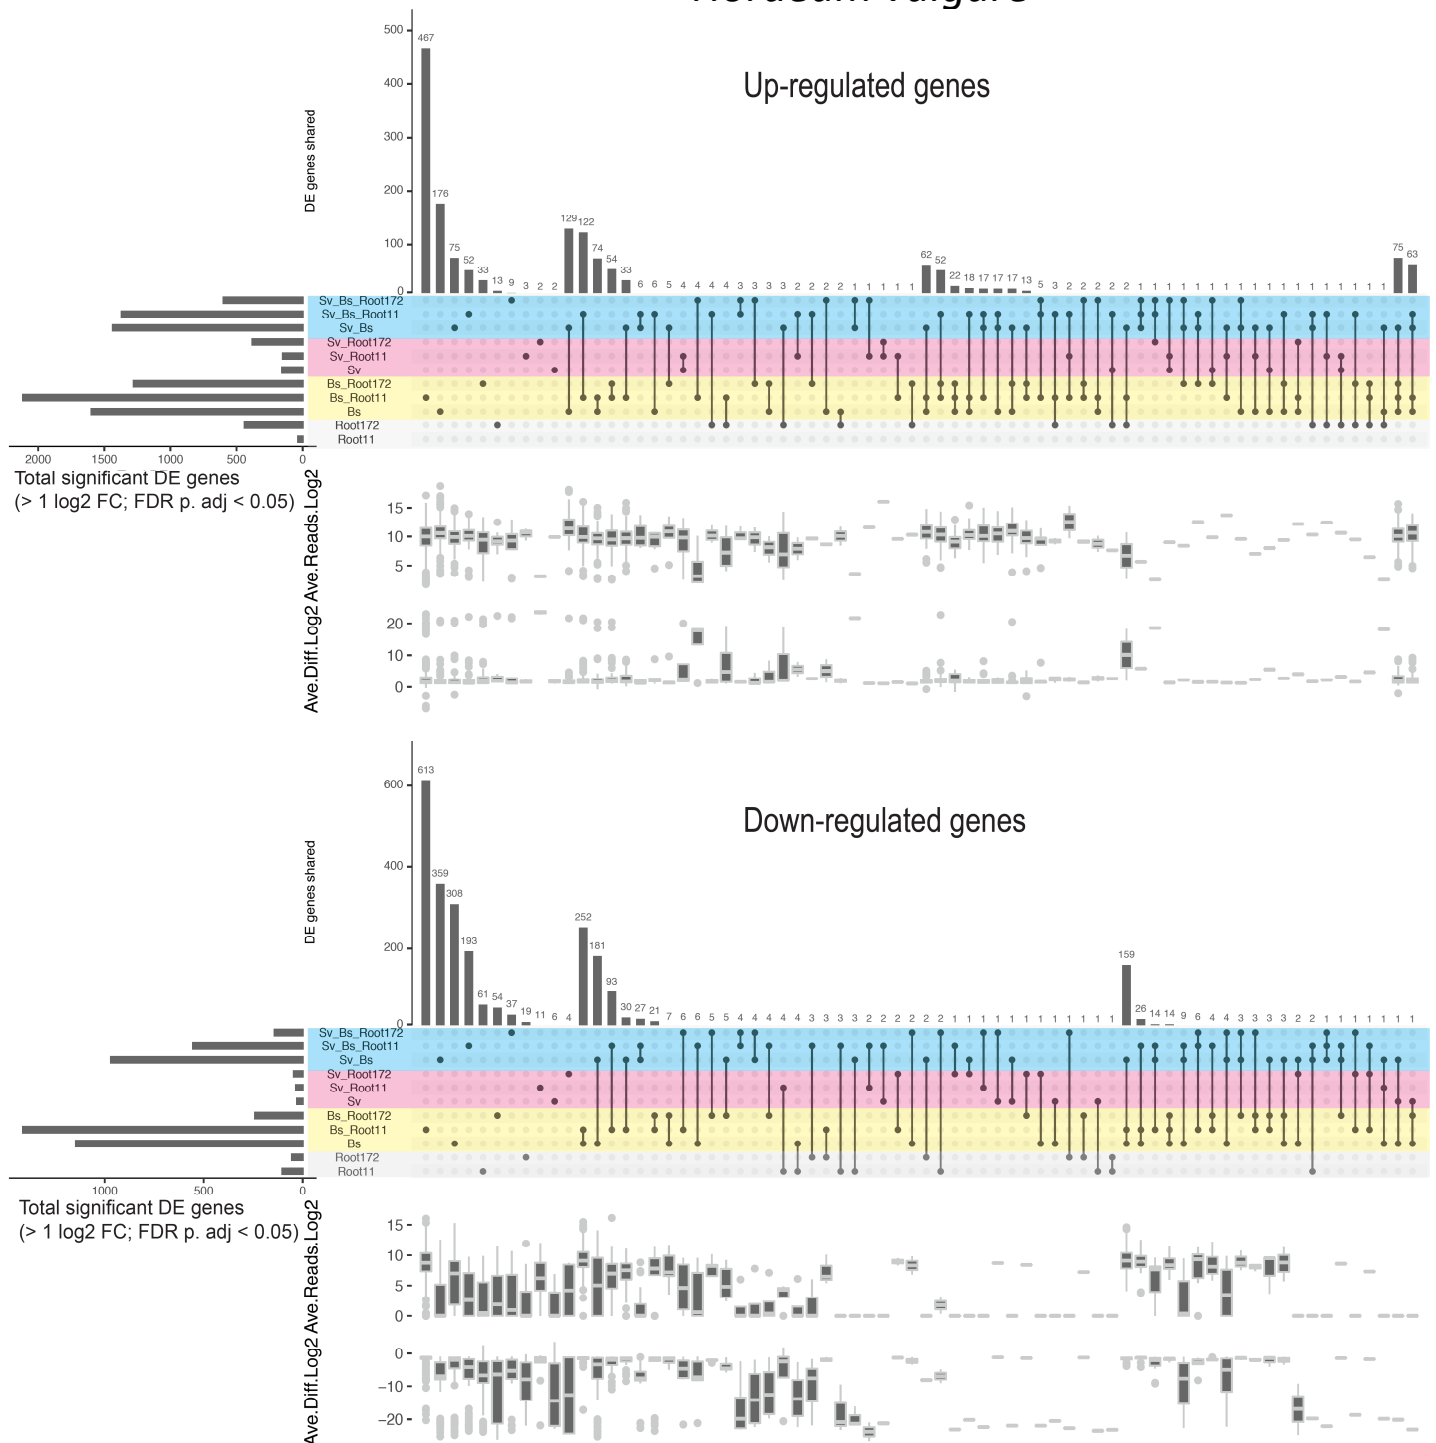

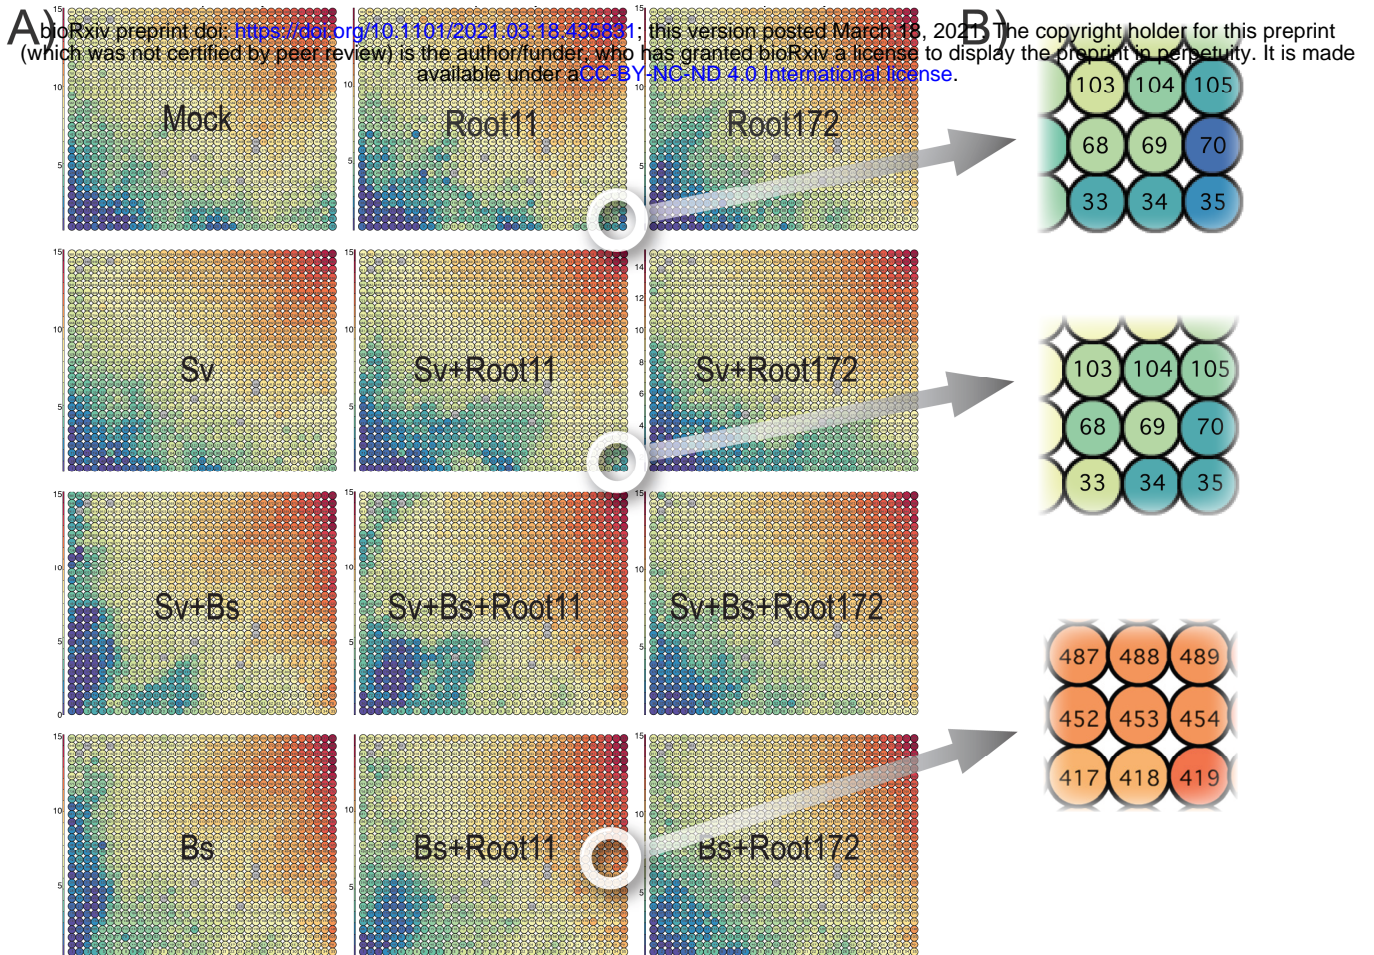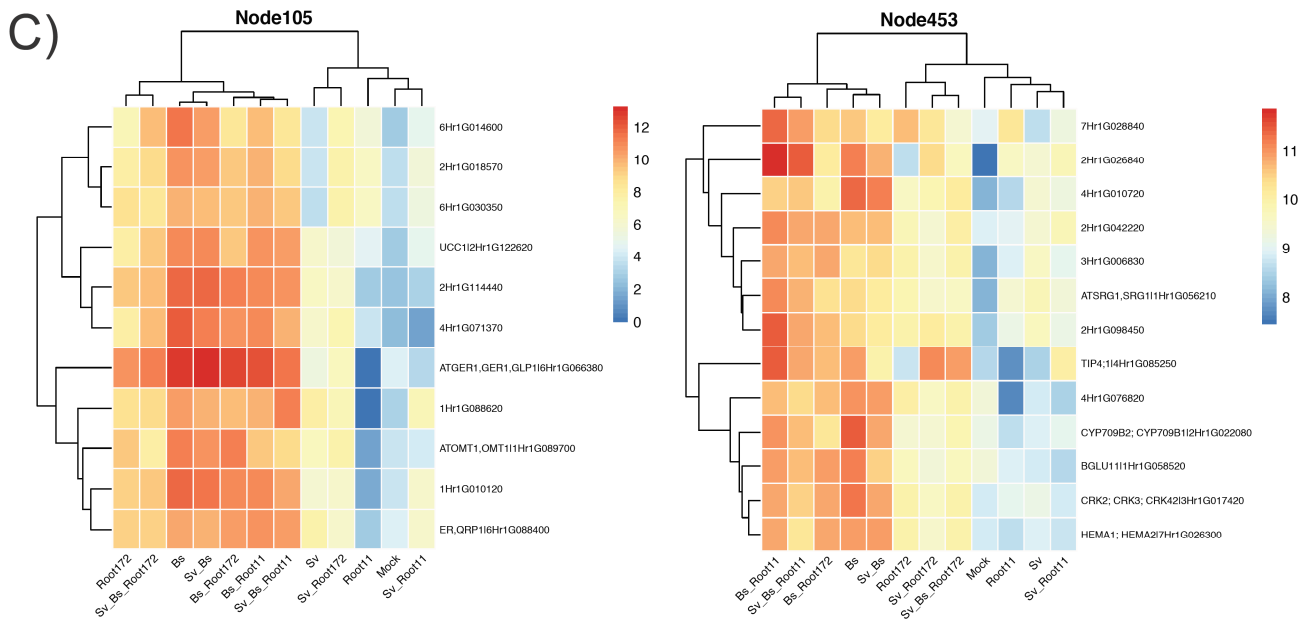

Fig. S7

**Fig. S7: Genome-wide transcriptomic dynamics of *H. vulgare* per condition.** A) Trained Self-Organizing Maps (SOM, Tatami maps) showing barley global transcriptomic trends. Colors indicate the averaged log<sub>2</sub> read count of replicates from each of the conditions. Each circle represents a node (IDs 1 to 1015). Single nodes contain approximately 10 to 100 genes. The SOM resulted in similarly-expressed genes separated into high, medium, and low expressed groups. The highly transcribed genes are clustered at the top right corner (red) and the lowly transcribed groups at the bottom left corner (blue). Barley inoculated with *S. vermifera* (Sv) exhibited similar patterns to barley mock. The presence of the pathogen (*Bs*) was a major factor driving responses in the host, which was consistent with the dynamics of DEG shown in Fig. 5. There were additional effects of the co-inoculated bacteria on barley (Root11 and Root172). The shape of the lowly transcribed clusters shifted in co-inoculated roots with the bacterial strains (e.g. *Bs* vs *Bs*+Root11 or *Bs*+Root172). B) Double-circles (i.e. white doughnuts) on Tatami maps indicate the location of highly regulated gene groups and such gene groups are magnified. C) Examples of highly regulated genes (FDR adjusted  $p < 0.05$ ) present in particular nodes. The high and low log<sub>2</sub> gene expression is displayed in red and blue respectively. Gene identification number with corresponding annotations (if there is any) are presented on Y-axis. Node 105 contains similarly lowly expressed genes for barley mock, bacterium 11, and *S. vermifera* (Mock, Root11, Sv\_Root11). Node 453 shows highly expressed genes for *B. sorokiniana* with bacterium 11 (*Bs*\_Root11). See Table S3 for details.

bioRxiv preprint doi: <https://doi.org/10.1101/2021.03.18.435831>; this version posted March 18, 2021. The copyright holder for this preprint (which was not certified by peer review) is the author/funder, who has granted bioRxiv a license to display the preprint in perpetuity. It is made available under aCC-BY-NC-ND 4.0 International license.

GO enrichment analysis (up-regulated barley genes)

Cross comparison of SEA (SEACOMPARE)

AgriGO V2 doi: 10.1093/nar/gkx382

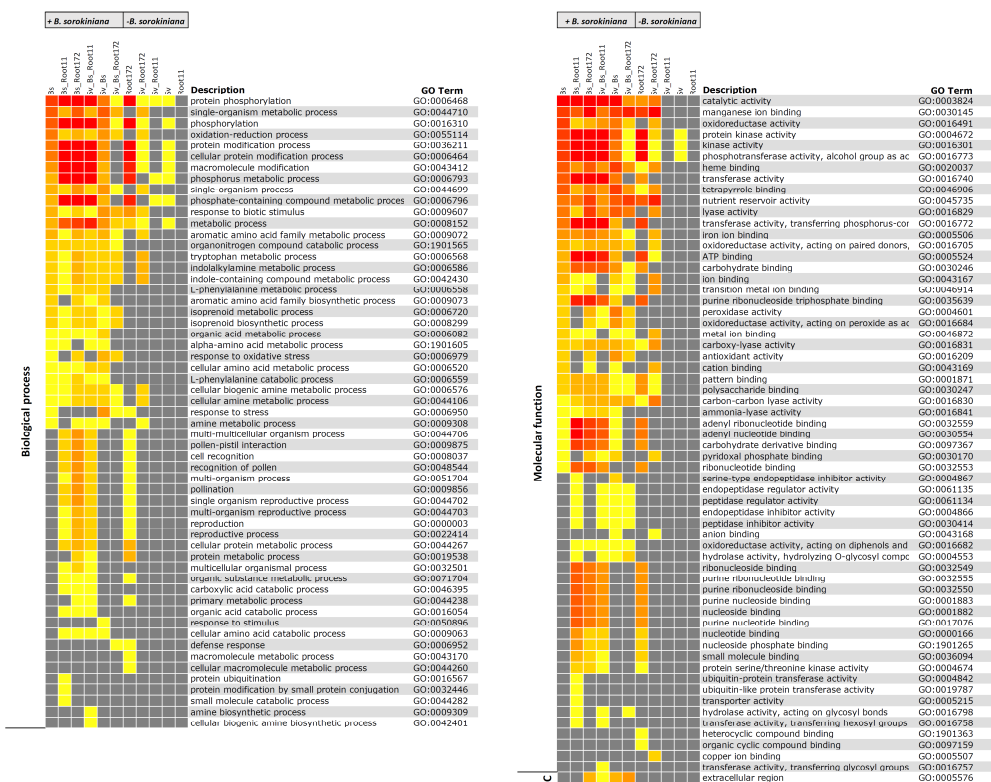

Color code: red - most significant, yellow - significant, grey - not significant

Differentially expressed barley genes compared to mock.

C. Cellular Component

GO enrichment analysis (down-regulated genes)

Cross comparison of SEA (SEACOMPARE)

AgriGO V2 doi: 10.1093/nar/gkx382

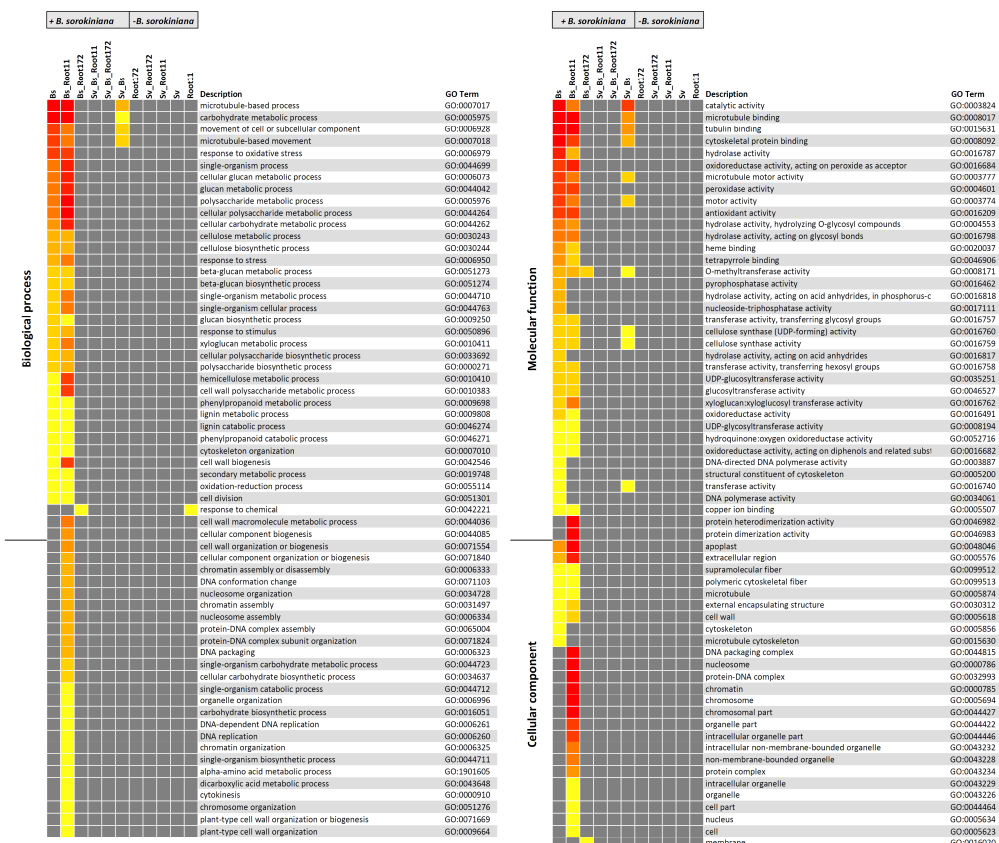

Color code: red - most significant, yellow - significant, grey - not significant

Differentially expressed barley genes compared to mock.

**Fig. S8: GO enrichment analysis (up- and down-regulated barley genes)**

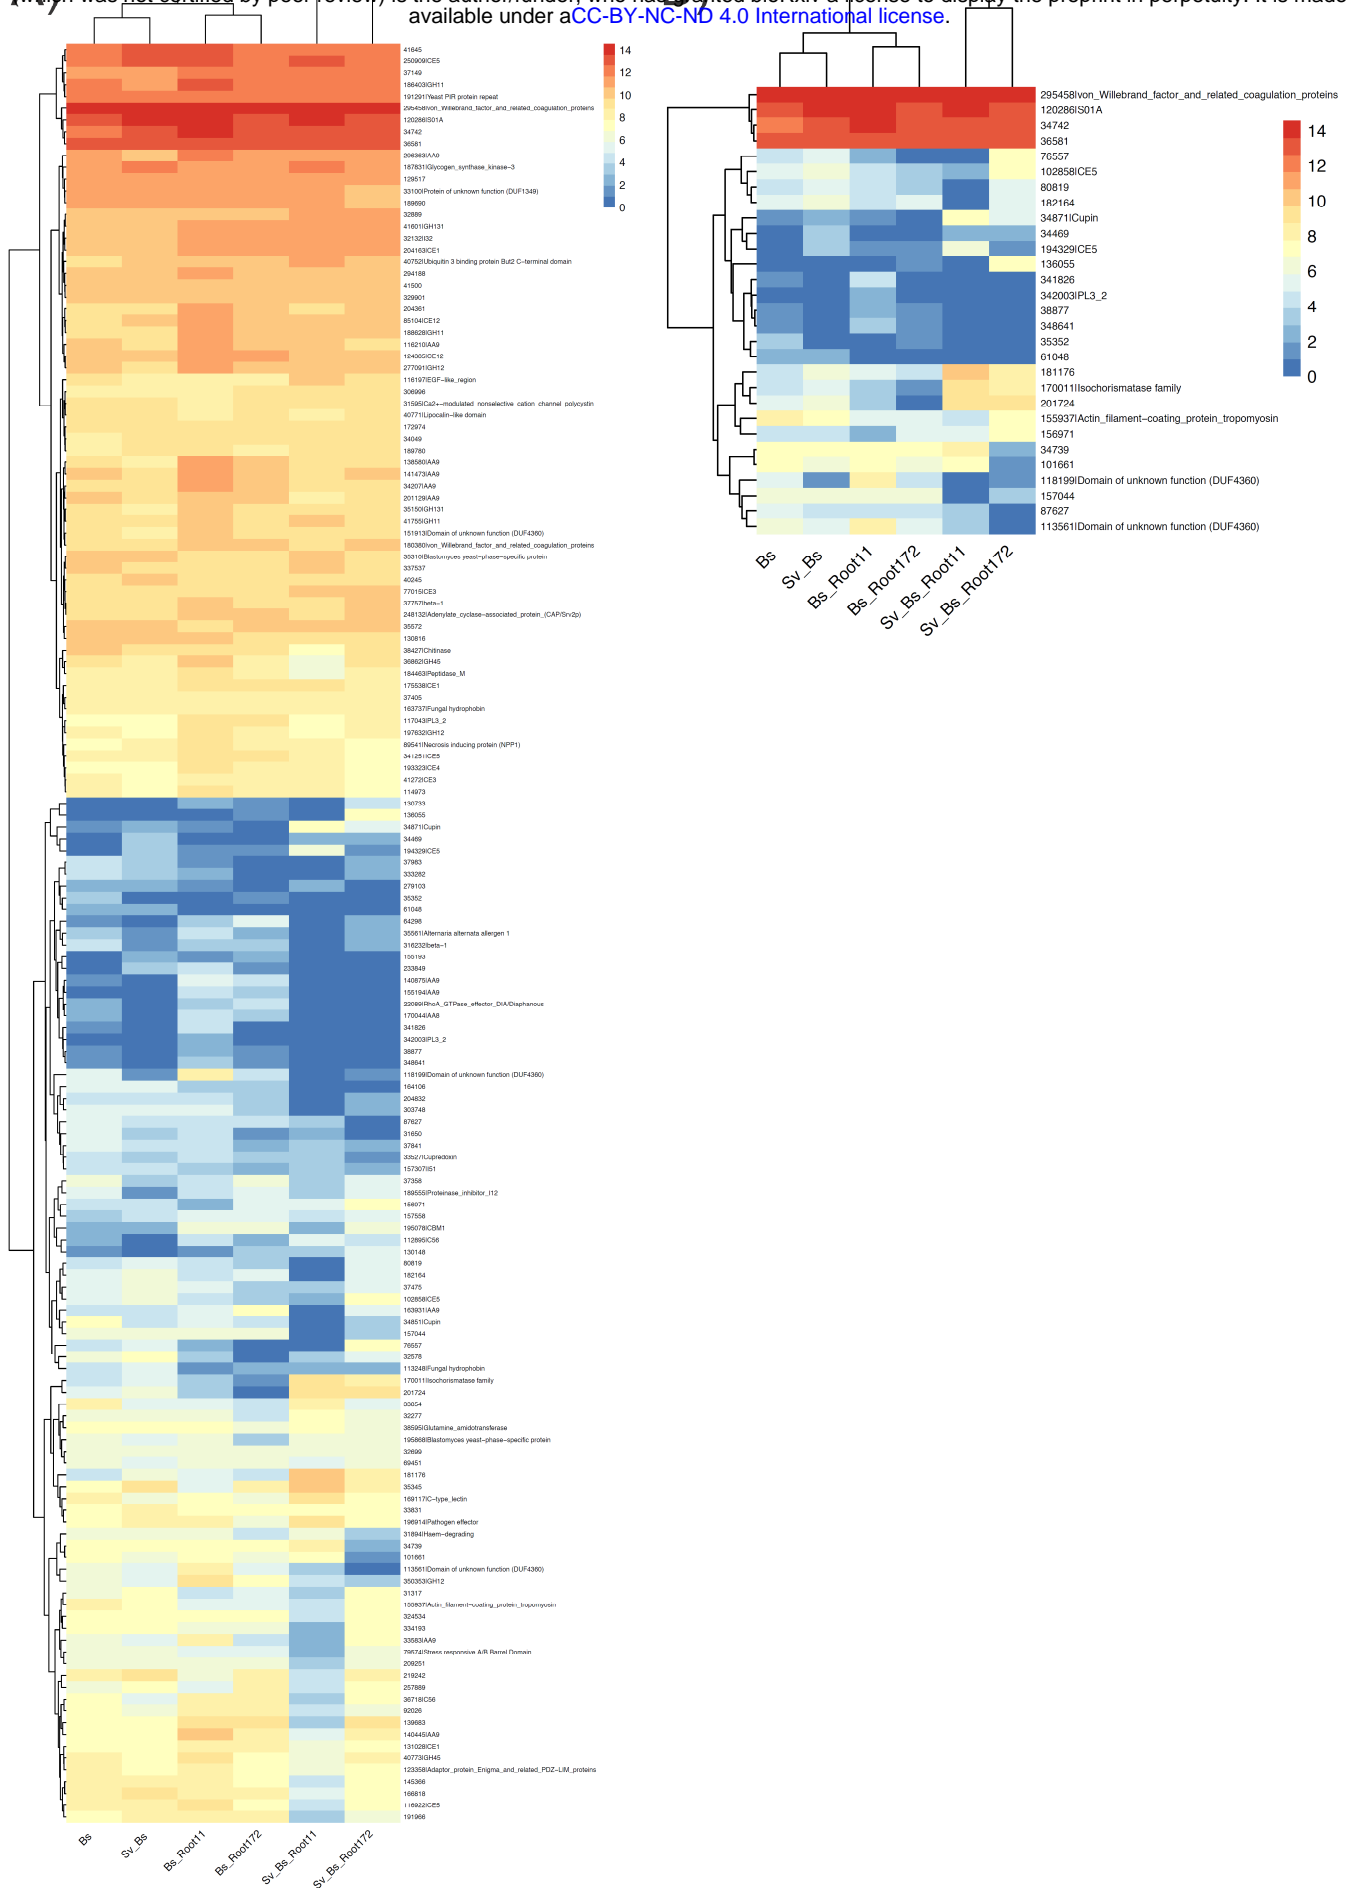

Fig. S9

**Fig. S9: Expression of genes coding for effectors in *B. sorokiniana*.** A) Averaged log<sub>2</sub> read count of genes under the conditions. Y-axis shows JGI Protein IDs with corresponding annotations. B) Averaged log<sub>2</sub> read count of genes with high loadings (see Methods). Y-axis shows JGI Protein IDs with corresponding annotations if there is any. See Table S9.



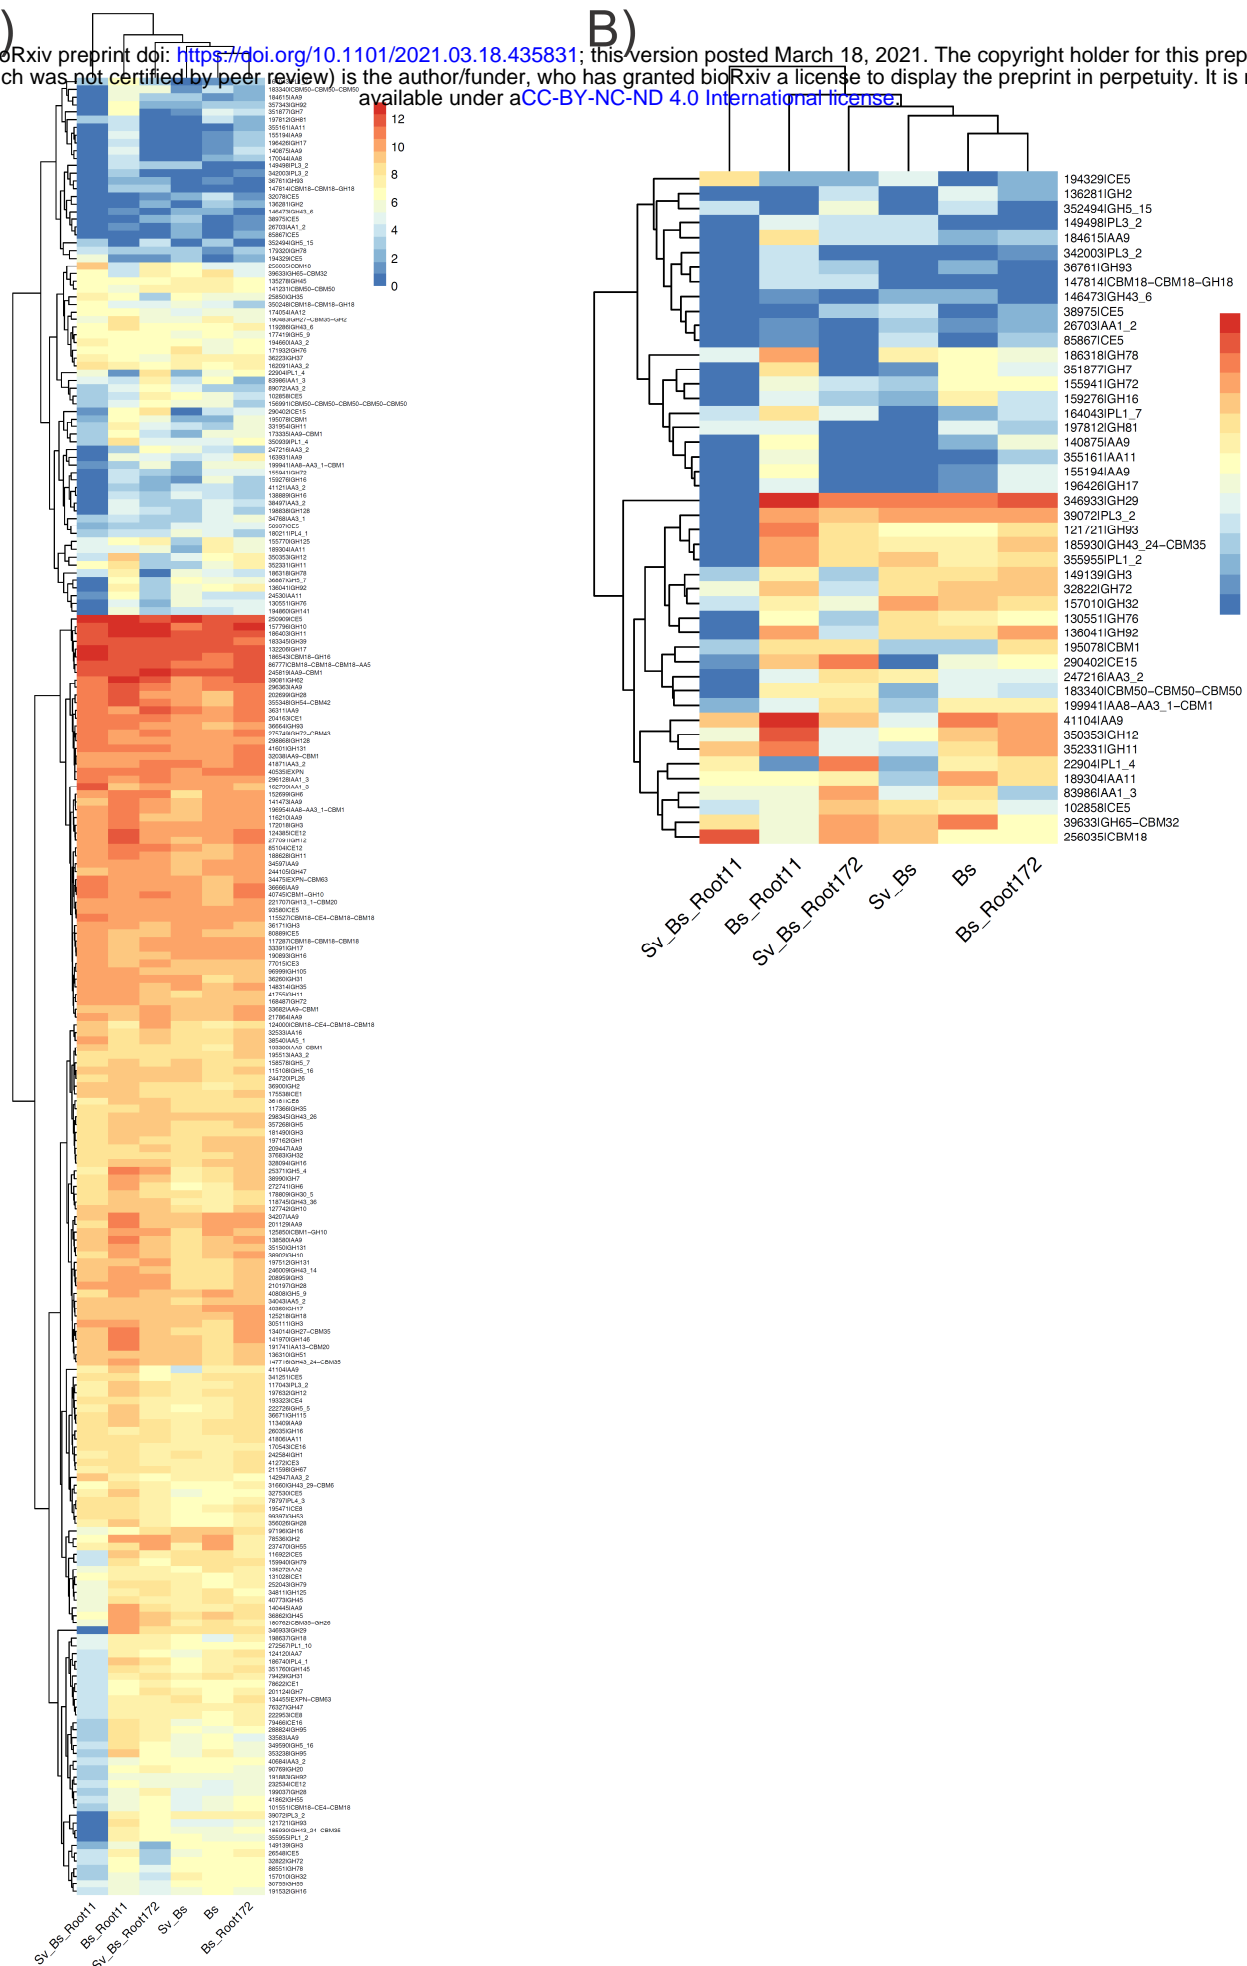

**Fig. S10**

bioRxiv preprint doi: <https://doi.org/10.1101/2021.03.18.435831>; this version posted March 18, 2021. The copyright holder for this preprint (which was not certified by peer review) is the author/funder, who has granted bioRxiv a license to display the preprint in perpetuity. It is made available under aCC-BY-NC-ND 4.0 International license.

**Fig. S10. Expression of genes coding for CAZymes predicted to be secreted in *B. sorokiniana*.** A) Averaged log<sub>2</sub> read count of genes under the conditions. Y-axis shows JGI Protein IDs with corresponding annotations. B) Averaged log<sub>2</sub> read count of genes with high loadings (see Methods). Y-axis shows JGI Protein IDs with corresponding annotations if there is any. See Table S9.

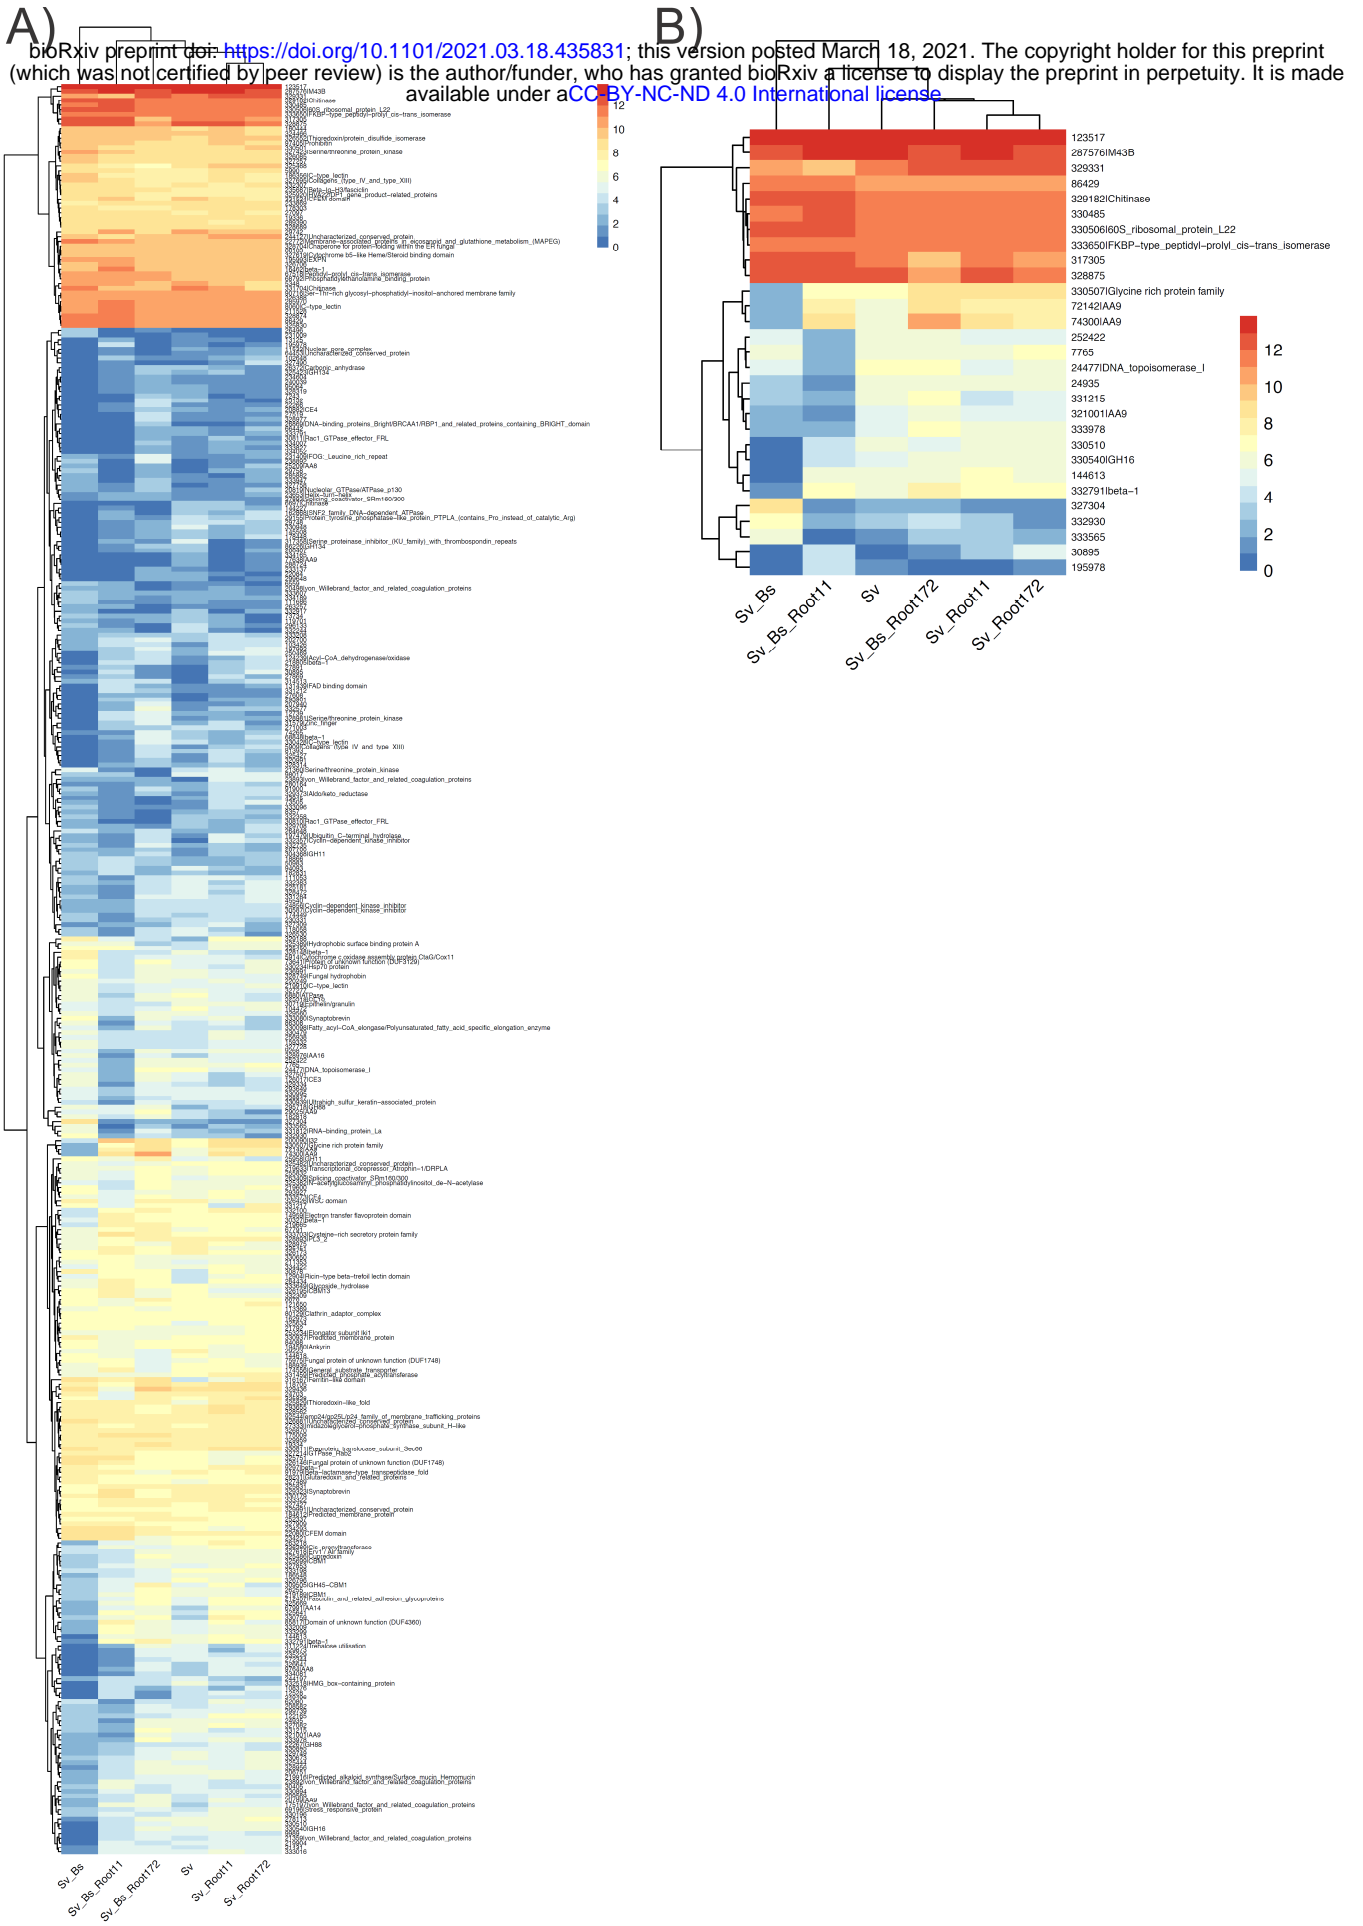

Fig. S11

**Fig. S11. Expression of genes coding for effectors in *S. vermifera*.** A) Averaged log<sub>2</sub> read count of genes under the conditions. Y-axis shows JGI Protein IDs with corresponding annotations. B) Averaged log<sub>2</sub> read count of genes with high loadings (see Methods). Y-axis shows JGI Protein IDs with corresponding annotations if there is any. See Table S9.

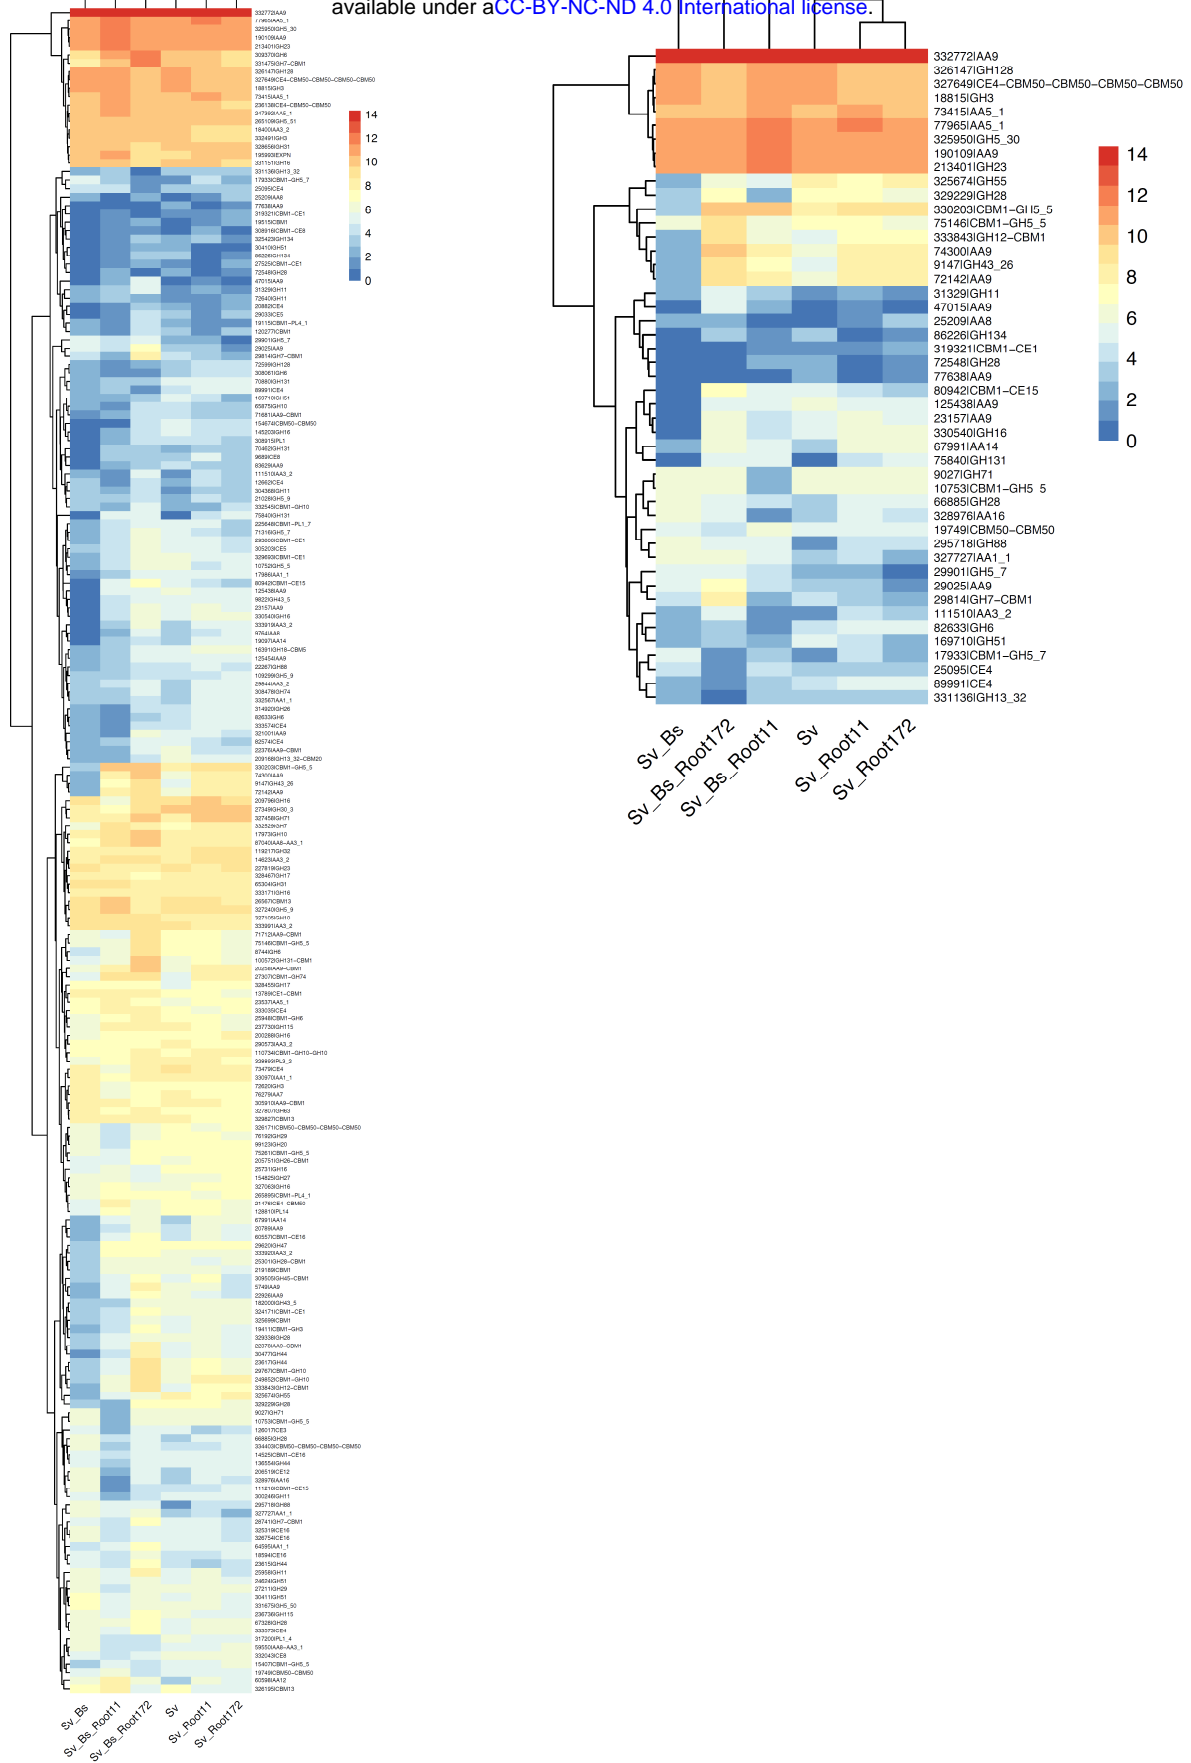

Fig. S12

**Fig. S12: Expression of genes coding for CAZymes predicted to be secreted in *S. vermifera*.** A) Averaged log<sub>2</sub> read count of genes under the conditions. Y-axis shows JGI Protein IDs with corresponding annotations. B) Averaged log<sub>2</sub> read count of genes with high loadings (see Methods). Y-axis shows JGI Protein IDs with corresponding annotations if there is any. See Table S9.

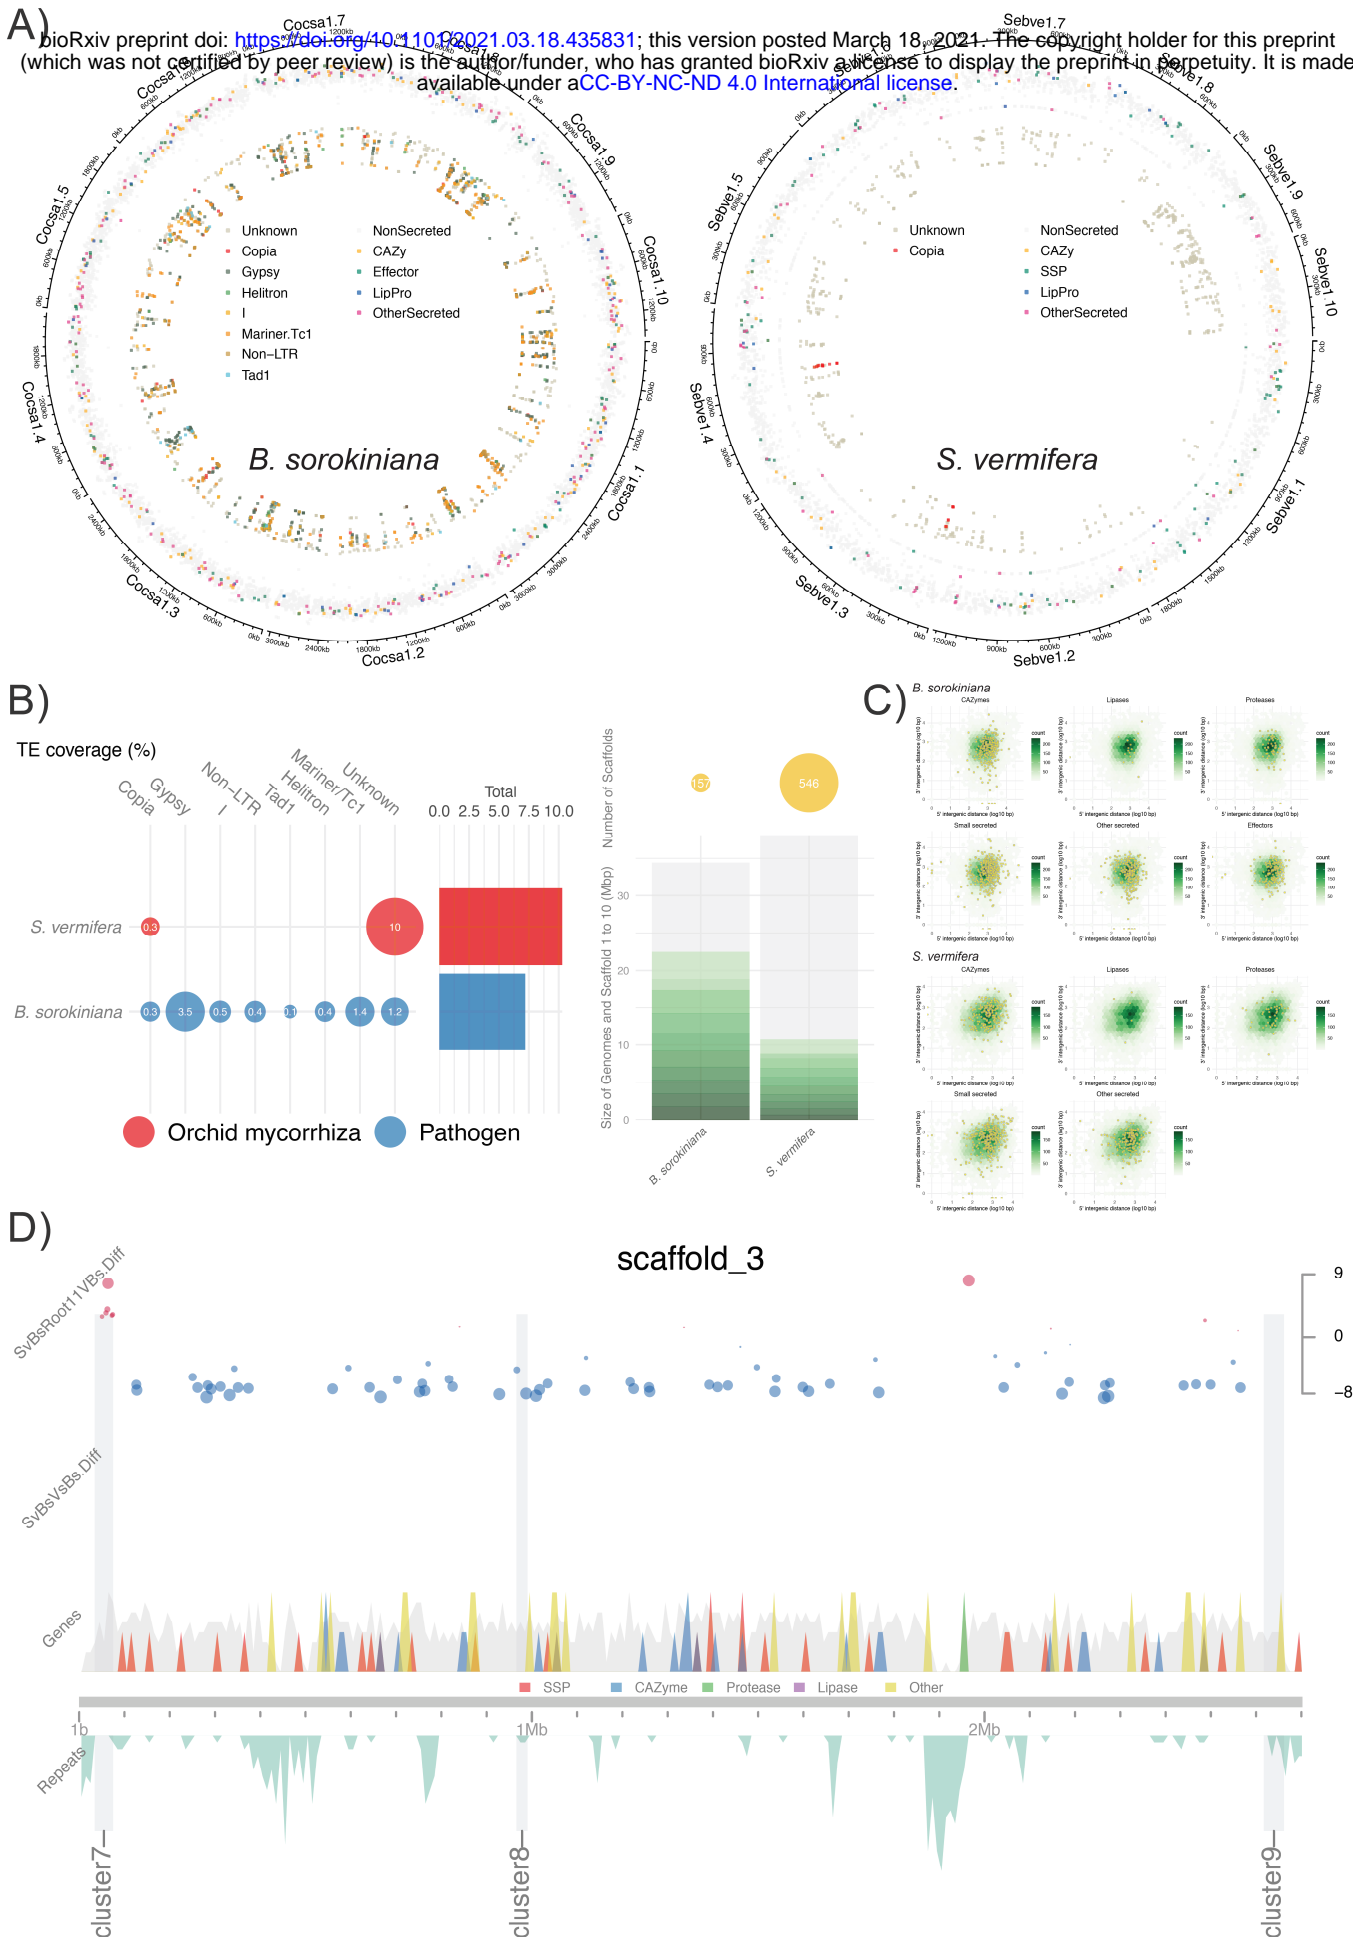

Fig. S13

**Fig. S13: Genomic features of *B. sorokiniana* and *S. vermifera*.** A) The genomic location of genes and transposable elements (TEs) are visualised with the largest 1 to 10 scaffolds from the genome assemblies. Hanabi plots (fireworks in Japanese) contains three rings. Outer ring: The size of scaffold 1 to 10 presented clock-wise starting from 3 o'clock. Colors of Scaffold 1 to 10 are from dark grey to light grey. The boxes next to "fungal names + scaffold ID" represents the length of the scaffolds. Approximate locations of genomic features can be seen with the small rulers aligned in the outer ring. Middle ring: The genomic locations of all genes based on JGI GFF files. Genes coding for theoretically secreted proteins (CAZymes, SSPs, lipases, proteases) are in color. Other genes coding for non-secreted (i.e. intracellular) proteins are in grey. Inner ring: The genomic locations of TE families and unidentified repeats. Repeat sequences (>50 bases with >10 occurrences in a genome) were identified. Vertical axis for the density of genes/TEs in the rings: The mean distance of neighboring genes or TEs in log<sub>2</sub>. If distances between genes/TEs are short, dots (i.e. the locations of genes and TEs) go towards the centre of plots. If distances between genes/TEs are long, dots go towards the outer circle (it gives a sense of how densely localized or dispersed genes/TEs are). See Table S10 for details. B) TE content and scaffolds in the genome assemblies. Left panel: Coverage of transposable elements in the genomes. The size of the bubbles corresponds to the percentage of TE coverage in the genomes. Right panel: Genome size and the number of scaffolds. The bars in grey indicate the genome size. Individual green sections shows the largest scaffolds 1 to 10. The circle size corresponds to the number of total scaffolds. The ecological lifestyle is in color. C) Intergenic distances of genes for secreted proteins (i.e. intergenic distance = gene to gene distance). Proteins predicted to be secreted are categorised into CAZymes, proteases, lipases, the rest of secreted protein, effectors, and a subcategory for small secreted proteins (< 300 amino acids). Yellow points: Intergenic 5' and 3' distances of individual genes. Green tiles: Density of intergenic distances of all genes present in a genome. Genes tend to be gathered at the centre of the maps, showing average intergenic distances. Genes nearby a cluster of transposable elements tend to show long intergenic distances (see top right corner) where new functions of genes might be evolved due to the transposition. See Table S11. D) Visual integration of multi-omics showing highly regulated biosynthetic gene clusters in *B. sorokiniana*. Omics data (transcriptome, secretome, repeatome and genome) are combined and visualised. Scaffold 3 from the genome assembly is presented for example. Grey vertical bars: Biosynthetic gene clusters. Top panel: Significantly regulated genes under conditions. The size of circles and colors correspond to differential transcription levels in log<sub>2</sub>. Middle panel: The genomic locations and density of all genes (grey) and gene for secreted proteins (colors). The scaffold size of a genome assembly is shown as a grey horizontal bar. Bottom panel: The genomic location and density of total and individual TE families. See Table S12 for details.



## Supplementary Methods to Fig. S13

bioRxiv preprint doi: <https://doi.org/10.1101/2021.03.18.435831>; this version posted March 18, 2021. The copyright holder for this preprint (which was not certified by peer review) is the author/funder, who has granted bioRxiv a license to display the preprint in perpetuity. It is made available under aCC-BY-NC-ND 4.0 International license.

**Multio-mics integration and visualization for fungi: Secreted proteins were predicted using** the method described previously (Pellegrin *et al.*, 2015). CAZy annotations were provided from CAZy team ([www.cazy.org](http://www.cazy.org)). Transposable element (TE) identification was performed with Transposon Identification Nominative Genome Overview (TINGO; Morin *et al.*, 2019). We predicted biosynthetic gene clusters with antiSMASH 5.1 (Madema *et al.*, 2011). Differential expression of genes was calculated with the control, *B. sorokiniana* alone grown in barley using DESeq2 (Love *et al.*, 2014). We excluded genes showing either very low raw reads or adjusted p value (FDR) larger than 0.05. Differentially expressed genes coding for effectors were obtained from the previous study (Sarkar *et al.*, 2019). Output files obtained from the various analyses above and functional annotations from JGI MycoCosm were cleaned, sorted, combined and visualized using a set of custom R scripts, Visually Integrated Numerous Genes of Omics (VINGO; Looney *et al.*, 2021) incorporating R package karyoploteR (Gel & Serra 2017). Also, we located genomic features (i.e. genes, predicted secretome, transposable elements) in the largest scaffold 1 to 10 in a circular manner (Hanabi plots) with Syntenic Governance Overview (SynGO; Hage *et al.*, 2021) incorporating R package Circlize for visualization (Gu *et al.*, 2014).

*Visual intergenic distances in genomes with statistics.* Intergenic distances in the genomes were calculated based on the study (Saunders *et al.* 2014). The original scripts are obtained from <https://github.com/Adamtaranto/density-Mapr>. Theoretically secreted proteins were determined with Secretome pipeline mentioned above. The results were visualized using a visual pipeline SynGO (Hage *et al.*, 2021). The mean TE-gene distances were calculated from; (i) the locations of observed genes and TEs; and (ii) random “null hypothesis” genome models made by randomly reshuffling the locations of genes. The distribution of genomic features was purely random for null models and there was no association between the locations of genes and repeat elements. The probability (p-value) of mean TE-gene distances was calculated based on a normal distribution of 10,000 null hypothesis models. The process was performed with R package, regioneR (Gel *et al.*, 2016).

## References

- Gel & Serra. (2017). karyoploteR: an R/Bioconductor package to plot customizable genomes displaying arbitrary data. *Bioinformatics*, 31–33. doi:10.1093/bioinformatics/btx346
- Gel, B. et al. regioneR: an R/Bioconductor package for the association analysis of genomic regions based on permutation tests. *Bioinformatics* 32, 289–91 (2016).
- Gu et al. circlize implements and enhances circular visualization in R. *Bioinformatics* 30, 2811–2812 (2014).
- Hage, H. *et al.* Gene family expansions and transcriptome signatures uncover fungal adaptations to wood decay. *Environ. Microbiol.* (2021).
- Looney, B. *et al.* Comparative genomics of Russulales Evolutionary priming and transition to the ectomycorrhizal habit in an iconic lineage of mushroom-forming fungi : is preadaptation a requirement? Comparative genomics of Russulales. bioRxiv (2021).
- Love, M. I., Huber, W., and Anders, S. (2014). Moderated estimation of fold change and dispersion for RNA-seq data with DESeq2. *Genome Biol.* 15, 550. doi:10.1186/PREACCEPT-8897612761307401.
- Medema, M. H. et al. antiSMASH: rapid identification, annotation and analysis of secondary metabolite biosynthesis gene clusters in bacterial and fungal genome sequences. *Nucleic Acids Res.* 39, W339-46 (2011).
- Morin, E. et al. Comparative genomics of *Rhizophagus irregularis*, *R. cerebriforme*, *R. diaphanus* and *Gigaspora rosea* highlights specific genetic features in Glomeromycotina. *New Phytol.* 222, 1584–1598 (2019).
- Pellegrin, C., Morin, E., Martin, F. M. & Veneault-Fourrey, C. Comparative Analysis of Secretomes from Ectomycorrhizal Fungi with an Emphasis on Small-Secreted Proteins. *Front. Microbiol.* 6, 1278 (2015).
- Sarkar, D. et al. The inconspicuous gatekeeper: endophytic *Serendipita vermifera* acts as extended plant protection barrier in the rhizosphere. *New Phytol.* 224, 886–901 (2019).
- Saunders, Diane GO, et al. "Two-dimensional data binning for the analysis of genome architecture in filamentous plant pathogens and other eukaryotes." *Plant-Pathogen Interactions: Methods and Protocols* (2014): 29-51.
